# Supplementary material for: Design of chiral ferrocenylphosphine-spiro phosphonamidite ligands for ruthenium-catalyzed highly enantioselective coupling of 1,2-diols with amines
Source: Royal Society of Chemistry journal article supplement (doi:10.1039/d1qo01443a), 2021-01-01
Supplement: d1qo01443a1.pdf [file d1qo01443a1.pdf]

## *Supporting information*

### **Design of Chiral Ferrocenylphosphine-spiro Phosphonamidite Ligands for Ruthenium-Catalysed Highly Enantioselective Coupling of 1,2-Diols with Amines**

Xiao Yi,<sup>‡</sup> Yirui Chen,<sup>‡</sup> An Huang, Dingguo Song, Jiaying He, Fei Ling\* and Weihui Zhong\*

*College of Pharmaceutical Sciences, Zhejiang University of Technology, Hangzhou 310014, P. R. China*

*E-mail: lingfei@zjut.edu.cn; weihuizhong@zjut.edu.cn*

| <b>Table of contents</b>                                                      | <b>Page</b> |
|-------------------------------------------------------------------------------|-------------|
| 1. General information                                                        | S3          |
| 2. General procedure for the preparation of SPIROL-derived PPFAPhos           | S4          |
| 3. General procedure for the Ru-catalyzed enantioselective amination of diols | S8          |
| 4. Characterization of the products                                           | S9          |
| 5. DFT calculations                                                           | S25         |
| 6. References                                                                 | S39         |
| 7. NMR spectrum                                                               | S40         |
| 8. HPLC charts of the products                                                | S86         |

## 1. General information

Commercial reagents were purchased from Adamas-beta, Aladdin, Bidepharm, Energy Chemical and TCI. 3,3'-diphenyl-SPINOLs were synthesized according to literature.<sup>[1]</sup> All air-sensitive manipulations were carried out with standard Schlenk techniques under argon. The progress of the reactions was monitored by TLC with silica gel plates, and the visualization was carried out under UV light (254 nm). Melting points were determined using a Büchi B-540 capillary melting point apparatus. Optical rotations were determined using an Rudolph AUTOPOL<sup>®</sup> V polarimeter. HPLC analyses were performed on Agilent 1100 and Waters e2695 with Daicel chiral columns. NMR spectra were recorded on Bruker Ascend<sup>™</sup> (400 MHz for <sup>1</sup>H, 100 MHz for <sup>13</sup>C, 375 MHz for <sup>19</sup>F, 162 MHz for <sup>31</sup>P) or Bruker Ascend<sup>™</sup> (600 MHz for <sup>1</sup>H, 125 MHz for <sup>13</sup>C, 565 MHz for <sup>19</sup>F, 243 MHz for <sup>31</sup>P). Chemical shifts were reported in  $\delta$  (ppm) referenced to the residual solvent peak of CDCl<sub>3</sub> ( $\delta$  7.26), DMSO-*d*<sub>6</sub> ( $\delta$  2.50), Acetone-*d*<sub>6</sub> ( $\delta$  2.050) for <sup>1</sup>H NMR and CDCl<sub>3</sub> ( $\delta$  77.0), DMSO-*d*<sub>6</sub> ( $\delta$  40.0), Acetone-*d*<sub>6</sub> ( $\delta$  29.8) for <sup>13</sup>C NMR. Multiplicity was indicated as follows: s (singlet), d (doublet), t (triplet), q (quartet), m (multiplet), br (broad). Coupling constants were reported in Hertz (Hz). HRMS spectra were recorded on an electrospray ionization quadrupole time-of-flight (ESI-Q-TOF) mass spectrometer.

## 2. General procedure for the preparation of SPIROL-derived PPFAPhos

**2** were prepared from (*R*) or (*S*)-**1** according to the literatures.<sup>[2]</sup> A solution of aminophosphine **2** (1 mmol) in acetic anhydride (3 mL) was stirred at 60 °C for 2-3 h to afford a homogeneous solution. The excess acetic was removed under reduced pressure. Then, 5 mL of hexane was added, and the solvent was concentrated again. The operation was repeated three times following by adding a solution of 40% wt. methylamine solution (3 mL) in *iso*-propanol (3 mL). The mixture was heated to 60 °C overnight to afford a homogeneous solution. The mixture was cooled to room temperature, and water (4 mL) was added. This resulted in an orange precipitate. The mixture was stirred at ambient temperature for 30 min and the solid was filtered, washed with water, and dried in a nitrogen-purged vacuum oven at 40 °C for 2 days to afford (*Rc*, *Sp*) or (*Sc*, *Rp*)-**3** as an orange solid (~84% two steps).

Chlorophosphite **4** (0.5 mmol) was dissolved in 4.0 mL of dried toluene, which was cooled to 0 °C. A solution of (*Rc, Sp*)-**3** or (*Sc, Rp*)-**3** (1.0 mmol) and Et<sub>3</sub>N (3.0 mmol) in 4.0 mL of toluene was added to above-solution during 30 minutes. The resulting mixture was standing at room temperature overnight. The precipitation was filtrated, and the solid was washed with toluene. The filtrate was collected, and concentrated under reduced pressure. The crude product was purified by column chromatography (silica gel, hexanes/ethyl acetate = 10/1) to yield **L1-L5**.

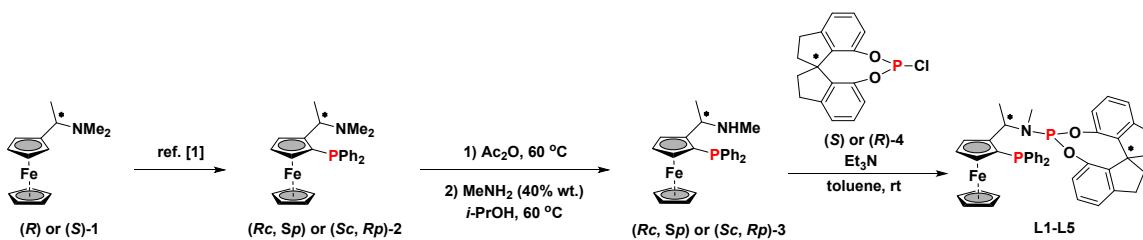

**Scheme S1.** Preparation of SPIROL-derived PPFAPHos

(*Rc, Sp, S*)-**L1**:

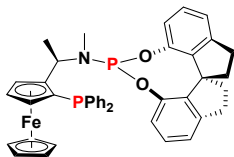

Yellow solid; m.p.= 138-140 °C; 56% yield;  $[\alpha]_{\text{D}}^{25} = -266.8$  ( $c = 0.25$ , CHCl<sub>3</sub>); <sup>1</sup>H NMR (400 MHz, Acetone-*d*<sub>6</sub>)  $\delta$  7.73 – 7.62 (m, 2H), 7.51 – 7.42 (m, 3H), 7.21 – 6.88 (m, 9H), 6.84 (d,  $J = 8.0$  Hz, 1H), 5.87 (d,  $J = 7.2$  Hz, 1H), 5.28 – 5.15 (m, 1H), 4.59 (d,  $J = 1.0$  Hz, 1H), 4.43 (t,  $J = 2.8$  Hz, 1H), 4.05 (s, 1H), 3.90 (s, 5H), 3.10 – 2.95 (m, 2H), 2.78 – 2.63 (m, 2H), 2.25 – 2.11 (m, 2H), 1.81 (d,  $J = 7.2$  Hz, 3H), 1.78 – 1.67 (m, 2H), 1.57 (d,  $J = 2.8$  Hz, 3H); <sup>13</sup>C NMR (100 MHz, Acetone-*d*<sub>6</sub>)  $\delta$  149.4 (d,  $J_{\text{C-P}} = 6.0$  Hz), 147.8 (d,  $J_{\text{C-P}} = 7.5$  Hz), 145.9 (d,  $J = 2.0$  Hz), 145.8, 142.7 (d,  $J_{\text{C-P}} = 9.5$  Hz), 141.5, 140.2 (d,  $J_{\text{C-P}} = 9.5$  Hz), 136.7 (d,  $J_{\text{C-P}} = 23.0$  Hz), 132.5 (d,  $J_{\text{C-P}} = 16.5$  Hz), 130.1, 129.0, 128.9 (d,  $J_{\text{C-P}} = 8.4$  Hz), 128.7 (d,  $J = 2.0$  Hz), 128.4 (d,  $J_{\text{C-P}} = 5.0$  Hz), 127.9, 122.4, 121.3 (d,  $J = 2.5$  Hz), 121.0, 96.4 (dd,  $J_{\text{C-P}} = 27.5, 14.0$  Hz), 76.0 (d,  $J_{\text{C-P}} = 14.0$  Hz), 72.4 (d,  $J_{\text{C-P}} = 5.5$  Hz), 71.2 (dd,  $J_{\text{C-P}} = 4.5, 2.5$  Hz), 70.6, 70.5, 59.4, 52.2 (dd,  $J = 54.5, 9.0$  Hz), 38.9, 31.2, 30.9, 24.9 (d,  $J = 7.0$  Hz), 19.6; <sup>31</sup>P NMR (162 MHz, Acetone-*d*<sub>6</sub>)  $\delta$  125.7 (d,  $J = 58.7$  Hz), -24.4 (d,



$J = 57.7$  Hz); HRMS-ESI ( $m/z$ ): calcd for  $C_{42}H_{40}FeNO_2P_2^+$   $[M+H]^+$  708.1878, found 708.1874.

(*R<sub>c</sub>*, *S<sub>p</sub>*, *R*)-**L2**:

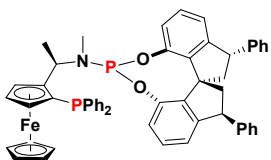

Yellow solid; m.p.= 160-162 °C; 61% yield;  $[\alpha]_D^{25} = -217.5$  ( $c = 0.3$ ,  $CHCl_3$ );  $^1H$  NMR (600 MHz, Acetone- $d_6$ )  $\delta$  7.72 – 7.66 (m, 2H), 7.45 (d,  $J = 4.8$  Hz, 3H), 7.35 – 7.27 (m, 8H), 7.25 – 7.15 (m, 8H), 6.92 (t,  $J = 7.8$  Hz, 1H), 6.84 (d,  $J = 7.8$  Hz, 1H), 6.59 (d,  $J = 7.2$  Hz, 1H), 6.51 (d,  $J = 7.2$  Hz, 1H), 6.28 (d,  $J = 8.0$  Hz, 1H), 4.97 – 4.86 (m, 1H), 4.65 (s, 1H), 4.62 – 4.53 (m, 2H), 4.49 (t,  $J = 2.4$  Hz, 1H), 4.18 (s, 1H), 3.90 (s, 5H), 2.83 (dd,  $J = 12.0, 6.0$  Hz, 1H), 2.73 (dd,  $J = 12.0, 6.0$  Hz, 1H), 2.12 – 2.06 (m, 1H), 2.02 – 1.97 (m, 1H), 1.87 (d,  $J = 4.8$  Hz, 3H), 1.66 (d,  $J = 7.2$  Hz, 3H);  $^{13}C$  NMR (150 MHz, Acetone- $d_6$ )  $\delta$  149.8, 149.7 (d,  $J_{C-P} = 5.4$  Hz), 149.2, 147.2, 147.1, 145.3, 144.6, 142.6 (d,  $J_{C-P} = 3.3$  Hz), 141.8 (d,  $J_{C-P} = 9.6$  Hz), 141.3, 140.2 (d,  $J = 9.6$  Hz), 136.4 (d,  $J_{C-P} = 23.1$  Hz), 133.2 (d,  $J_{C-P} = 17.7$  Hz), 130.1, 129.5, 129.4, 129.3 (d,  $J_{C-P} = 5.4$  Hz), 129.0, 128.9 (d,  $J_{C-P} = 6.3$  Hz), 128.8, 128.4, 127.4, 123.2, 122.6 (d,  $J_{C-P} = 5.1$  Hz), 121.8, 121.5, 97.3 (dd,  $J_{C-P} = 27.6, 10.8$  Hz), 76.1 (d,  $J_{C-P} = 12.6$  Hz), 72.7 (d,  $J_{C-P} = 4.8$  Hz), 71.5 (t,  $J_{C-P} = 4.8$  Hz), 70.6, 70.3, 57.7, 50.1, 50.0, 49.7, 29.2, 20.7 (d,  $J_{C-P} = 6.0$  Hz);  $^{31}P$  NMR (243 MHz, Acetone- $d_6$ )  $\delta$  129.2, -25.6; HRMS-ESI ( $m/z$ ): calcd for  $C_{54}H_{48}FeNO_2P_2^+$   $[M+H]^+$  860.2504, found 860.2497.

(*R<sub>c</sub>*, *S<sub>p</sub>*, *R*)-**L3**:

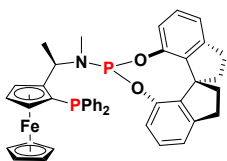

Yellow solid; m.p.= 143-145 °C; 63% yield;  $[\alpha]_D^{25} = -176.4$  ( $c = 0.3$ ,  $CHCl_3$ );  $^1H$  NMR (400 MHz, Acetone- $d_6$ )  $\delta$  7.72 – 7.63 (m, 2H), 7.44 (d,  $J = 3.6$  Hz, 3H), 7.32 – 7.21 (m, 5H), 7.17 (t,  $J = 8.0$  Hz, 1H), 7.02 (d,  $J = 7.8$  Hz, 1H), 6.94 – 6.86 (m, 2H), 6.76 (d,  $J = 8.0$

Hz, 1H), 6.16 (d,  $J = 7.2$  Hz, 1H), 4.87 – 4.74 (m, 1H), 4.61 (s, 1H), 4.47 (t,  $J = 2.4$  Hz, 1H), 4.18 (s, 1H), 3.88 (s, 5H), 3.11 – 2.95 (m, 2H), 2.79 – 2.69 (m, 2H), 2.27 – 2.13 (m, 2H), 1.90 – 1.73 (m, 2H), 1.72 (d,  $J = 4.2$  Hz, 3H), 1.68 (d,  $J = 7.2$  Hz, 3H);  $^{13}\text{C}$  NMR (100 MHz, Acetone- $d_6$ )  $\delta$  149.9 (d,  $J_{\text{C-P}} = 5.0$  Hz), 147.4 (d,  $J_{\text{C-P}} = 9.0$  Hz), 146.4 (d,  $J_{\text{C-P}} = 2.0$  Hz), 145.7, 143.0 (d,  $J_{\text{C-P}} = 3.0$  Hz), 141.8 (d,  $J_{\text{C-P}} = 9.0$  Hz), 141.1, 140.2 (d,  $J_{\text{C-P}} = 9.5$  Hz), 136.3 (d,  $J_{\text{C-P}} = 23.0$  Hz), 133.1 (d,  $J_{\text{C-P}} = 18.0$  Hz), 130.0, 129.1 (d,  $J_{\text{C-P}} = 2.0$  Hz), 129.0, 128.9, 128.9 (d,  $J_{\text{C-P}} = 2.0$  Hz), 128.8, 128.4, 122.8, 122.2 (d,  $J_{\text{C-P}} = 5.0$  Hz), 121.6 (d,  $J_{\text{C-P}} = 2.0$  Hz), 121.0, 97.4 (dd,  $J_{\text{C-P}} = 28.0, 11.0$  Hz), 75.9 (d,  $J_{\text{C-P}} = 12.5$  Hz), 72.6 (d,  $J_{\text{C-P}} = 5.0$  Hz), 71.4 (t,  $J_{\text{C-P}} = 5.5$  Hz), 70.5, 70.2, 59.5, 53.9 (dd,  $J = 36.0, 10.5$  Hz), 39.0, 38.9, 31.3, 30.9, 29.4, 20.8 (d,  $J = 7.5$  Hz);  $^{31}\text{P}$  NMR (162 MHz, Acetone- $d_6$ )  $\delta$  129.9 (d,  $J = 9.8$  Hz), -25.7 (d,  $J = 8.8$  Hz);  $^{31}\text{P}$  NMR (162 MHz, Acetone)  $\delta$  129.9 (d,  $J = 9.8$  Hz), -25.7 (d,  $J = 8.8$  Hz); HRMS-ESI (m/z): calcd for  $\text{C}_{42}\text{H}_{40}\text{FeNO}_2\text{P}_2^+ [\text{M}+\text{H}]^+$  708.1878, found 708.1889.

(*Sc*, *Rp*, *R*)-L4:

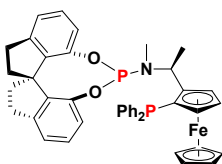

Yellow solid; m.p. = 142-143 °C; 62% yield;  $[\alpha]_{\text{D}}^{25} = +257$  ( $c = 0.2$ ,  $\text{CHCl}_3$ );  $^1\text{H}$  NMR (400 MHz, Acetone- $d_6$ )  $\delta$  7.73 – 7.63 (m, 2H), 7.50 – 7.42 (m, 3H), 7.21 – 6.88 (m, 9H), 6.83 (d,  $J = 8.0$  Hz, 1H), 5.87 (d,  $J = 7.2$  Hz, 1H), 5.28 – 5.15 (m, 1H), 4.59 (s, 1H), 4.43 (t,  $J = 2.8$  Hz, 1H), 4.05 (s, 1H), 3.90 (s, 5H), 3.09 – 2.94 (m, 2H), 2.78 – 2.66 (m, 2H), 2.25 – 2.12 (m, 2H), 1.81 (d,  $J = 7.0$  Hz, 3H), 1.77 – 1.67 (m, 2H), 1.56 (d,  $J = 2.9$  Hz, 3H);  $^{13}\text{C}$  NMR (100 MHz, Acetone- $d_6$ )  $\delta$  149.4 (d,  $J_{\text{C-P}} = 6.0$  Hz), 147.8 (d,  $J_{\text{C-P}} = 7.5$  Hz), 146.0 (d,  $J_{\text{C-P}} = 2.0$  Hz), 145.8, 142.7 (d,  $J_{\text{C-P}} = 9.5$  Hz), 141.5, 140.2 (d,  $J_{\text{C-P}} = 9.5$  Hz), 136.7 (d,  $J_{\text{C-P}} = 23.0$  Hz), 132.5 (d,  $J_{\text{C-P}} = 16.5$  Hz), 130.2, 129.0, 128.9 (d,  $J_{\text{C-P}} = 8.5$  Hz), 128.7 (d,  $J_{\text{C-P}} = 2.0$  Hz), 128.4 (d,  $J_{\text{C-P}} = 5.0$  Hz), 127.9, 122.5, 122.4, 121.3 (d,  $J_{\text{C-P}} = 2.0$  Hz), 121.0, 96.5 (dd,  $J = 27.5, 14.5$  Hz), 76.0 (d,  $J_{\text{C-P}} = 14.0$  Hz), 72.4 (d,  $J = 5.5$  Hz), 71.2 (dd,  $J_{\text{C-P}} = 4.5, 2.5$  Hz), 70.6, 70.5, 59.4, 52.2 (dd,  $J_{\text{C-P}} = 54.5, 8.5$  Hz), 38.9, 31.2, 30.9, 24.9 (d,  $J_{\text{C-P}} = 7.0$  Hz), 19.6;  $^{31}\text{P}$  NMR (162 MHz, Acetone- $d_6$ )  $\delta$  125.7 (d,  $J = 58.1$  Hz), -24.4 (d,  $J = 57.8$  Hz); HRMS-ESI (m/z): calcd for  $\text{C}_{42}\text{H}_{40}\text{FeNO}_2\text{P}_2^+ [\text{M}+\text{H}]^+$  708.1878, found 708.1866.

(*Sc, Rp, S*)-L5:

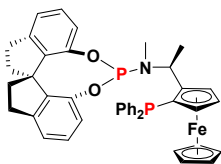

(*Sc, Rp, S*)-L4: Yellow solid; m.p.= 146-148 °C; 61% yield;  $[\alpha]_D^{25} = +204.6$  ( $c = 0.2$ ,  $\text{CHCl}_3$ );  $^1\text{H NMR}$  (400 MHz,  $\text{Acetone-}d_6$ )  $\delta$  7.71 – 7.64 (m, 2H), 7.46 – 7.41 (m, 3H), 7.32 – 7.21 (m, 5H), 7.17 (t,  $J = 8.0$  Hz, 1H), 7.02 (d,  $J = 7.2$  Hz, 1H), 6.94 – 6.86 (m, 2H), 6.76 (d,  $J = 8.0$  Hz, 1H), 6.16 (d,  $J = 7.2$  Hz, 1H), 4.86 – 4.74 (m, 1H), 4.61 (s, 1H), 4.48 (t,  $J = 2.4$  Hz, 1H), 4.18 (s, 1H), 3.88 (s, 5H), 3.12 – 2.95 (m, 2H), 2.79 – 2.67 (m, 2H), 2.28 – 2.13 (m, 2H), 1.89 – 1.74 (m, 2H), 1.72 (d,  $J = 4.2$  Hz, 3H), 1.69 (d,  $J = 7.2$  Hz, 3H);  $^{13}\text{C NMR}$  (100 MHz,  $\text{Acetone-}d_6$ )  $\delta$  149.9 (d,  $J_{\text{C-P}} = 5.0$  Hz), 147.4 (d,  $J_{\text{C-P}} = 9.0$  Hz), 146.4 (d,  $J_{\text{C-P}} = 2.0$  Hz), 145.7, 142.9 (d,  $J_{\text{C-P}} = 3.5$  Hz), 141.8 (d,  $J_{\text{C-P}} = 9.0$  Hz), 141.1 (d,  $J_{\text{C-P}} = 1.5$  Hz), 140.2 (d,  $J_{\text{C-P}} = 9.0$  Hz), 136.3 (d,  $J = 23.0$  Hz), 133.1 (d,  $J_{\text{C-P}} = 17.5$  Hz), 130.0, 129.1 (d,  $J_{\text{C-P}} = 2.0$  Hz), 129.0, 128.9, 128.9 (d,  $J_{\text{C-P}} = 2.0$  Hz), 128.8, 128.4, 122.8, 122.2 (d,  $J_{\text{C-P}} = 5.0$  Hz), 121.6 (d,  $J_{\text{C-P}} = 2.0$  Hz), 121.0, 97.4 (dd,  $J_{\text{C-P}} = 28.0, 11.0$  Hz), 75.9 (d,  $J_{\text{C-P}} = 12.5$  Hz), 72.6 (d,  $J_{\text{C-P}} = 5.0$  Hz), 71.4 (t,  $J_{\text{C-P}} = 5.0$  Hz), 70.5, 70.2, 59.5, 53.9 (dd,  $J_{\text{C-P}} = 36.5, 10.0$  Hz), 39.0, 38.9, 31.3, 30.9, 29.4, 20.8 (d,  $J_{\text{C-P}} = 7.0$  Hz);  $^{31}\text{P NMR}$  (162 MHz,  $\text{Acetone-}d_6$ )  $\delta$  129.9 (d,  $J = 9.0$  Hz), -25.7 (d,  $J = 9.8$  Hz); HRMS-ESI (m/z): calcd for  $\text{C}_{42}\text{H}_{40}\text{FeNO}_2\text{P}_2^+ [\text{M}+\text{H}]^+$  708.1878, found 708.1884.

### 3. General procedure for the Ru-catalyzed enantioselective amination of diols

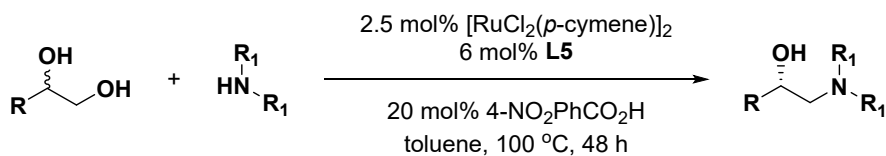

A sealed tube with magnetic stir bar was charged with diol substrate (0.4 mmol, 2 equiv.), corresponding amine (0.2 mmol, 1equiv.), 4-nitrobenzoic acid (6.68 mg, 0.04 mmol, 0.2 equiv.),  $[\text{Ru}(\textit{p}\text{-cymene})\text{Cl}_2]_2$  (3.0 mg, 0.005mmol, 0.025 equiv.), (*Sc*, *Rp*, *S*)-**L5** (8.6 mg, 0.012 mmol, 0.06 equiv.) and toluene (1mL) subsequently and the reaction mixture was stirred at 100 °C for 48 hours. After cooling to room temperature, washed with saturated sodium bicarbonate and brine, dried over anhydrous sodium sulfate, filtered and concentrated. The crude reaction mixture was purified by flash chromatography or pTLC to afford the desired products.

## 4. Characterization of the products

### (S)-1-phenyl-2-(piperidin-1-yl)ethanol (3aa)

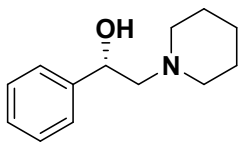

White solid; m.p.= 83-84 °C; 93% yield, >99% *ee*;  $[\alpha]_{\text{D}}^{25} = +83.2$  ( $c = 1.0$ ,  $\text{CHCl}_3$ ) {lit.<sup>[3]</sup>  $[\alpha]_{\text{D}}^{25} = +81.5$  ( $c = 1.0$ ,  $\text{CHCl}_3$ )};  $^1\text{H NMR}$  (400 MHz,  $\text{CDCl}_3$ )  $\delta$  7.42 – 7.22 (m, 5H), 4.71 (dd,  $J = 10.8, 3.6$  Hz, 1H), 4.23 (brs, 1H), 2.69 (s, 2H), 2.47 (dd,  $J = 12.4, 3.6$  Hz, 1H), 2.44 – 2.23 (m, 3H), 1.69 – 1.54 (m, 4H), 1.53 – 1.36 (m, 2H);  $^{13}\text{C NMR}$  (100 MHz,  $\text{CDCl}_3$ )  $\delta$  142.4, 128.3, 127.4, 125.8, 68.6, 66.9, 54.4, 26.1, 24.2; Determined by HPLC analysis [Daicel chiralpak AD-H, *n*-hexane/*i*-PrOH = 98:2, flow rate = 0.5 ml/min, wavelength = 254 nm,  $t$  (major) = 24.547 min]; HRMS-ESI ( $m/z$ ): calcd for  $\text{C}_{13}\text{H}_{20}\text{NO}^+$   $[\text{M}+\text{H}]^+$  206.1539, found 206.1546.

### (S)-2-(3,4-dihydroisoquinolin-2(1H)-yl)-1-phenylethanol (3ab)

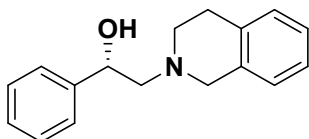

White solid; m.p.= 74-76 °C; 88% yield, 99% *ee*;  $[\alpha]_{\text{D}}^{25} = +61.8$  ( $c = 0.8$ ,  $\text{CHCl}_3$ ); {lit.<sup>[3]</sup>  $[\alpha]_{\text{D}}^{25} = 64.0$  ( $c = 1.0$ ,  $\text{CHCl}_3$ )};  $^1\text{H NMR}$  (400 MHz,  $\text{CDCl}_3$ )  $\delta$  7.51 – 7.26 (m, 5H), 7.24 – 7.02 (m, 4H), 4.96 – 4.82 (m, 1H), 4.06 (brs, 1H), 3.95 (dd,  $J = 14.8, 6.8$  Hz, 1H), 3.70 (dd,  $J = 14.8, 7.6$  Hz, 1H), 3.14 – 2.87 (m, 3H), 2.87 – 2.58 (m, 3H);  $^{13}\text{C NMR}$  (100 MHz,  $\text{CDCl}_3$ )  $\delta$  142.2, 134.4, 134.2, 128.8, 128.4, 127.6, 126.6, 126.4, 126.0, 125.9, 69.1, 69.1, 66.1, 55.8, 51.0, 29.2; Determined by HPLC analysis [Daicel chiralpak OD-H, *n*-hexane/*i*-PrOH = 90:10, flow rate = 0.5 ml/min, wavelength = 225 nm,  $t$  (minor) = 17.288 min,  $t$  (major) = 17.877 min]; HRMS-ESI ( $m/z$ ): calcd for  $\text{C}_{17}\text{H}_{20}\text{NO}^+$   $[\text{M}+\text{H}]^+$  254.1539, found 254.1537.

**(S)-2-(1,4-dioxa-8-azaspiro[4.5]dec-8-yl)-1-phenylethanol (3ac)**

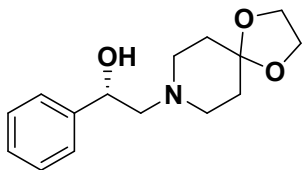

White solid; m.p.= 94-95 °C; 91% yield, 95% *ee*;  $[\alpha]_{\text{D}}^{25} = +57.3$  ( $c = 0.5$ ,  $\text{CHCl}_3$ );  $^1\text{H}$  NMR (600 MHz,  $\text{CDCl}_3$ )  $\delta$  7.40 – 7.32 (m, 4H), 7.28 – 7.24 (m, 1H), 4.72 (dd,  $J = 10.8, 3.6$  Hz, 1H), 3.96 (s, 4H), 2.90 – 2.80 (m, 2H), 2.56 (dd,  $J = 12.6, 3.6$  Hz, 3H), 2.52 – 2.44 (m, 1H), 1.85 – 1.72 (m, 4H);  $^{13}\text{C}$  NMR (150 MHz,  $\text{CDCl}_3$ )  $\delta$  142.2, 128.3, 127.5, 125.9, 107.0, 69.0, 65.7, 64.3, 51.3, 34.9; Determined by HPLC analysis [Daicel chiralpak OD-H, *n*-hexane/*i*-PrOH = 95:5, flow rate = 0.8 ml/min, wavelength = 225 nm,  $t$  (minor) = 14.531 min,  $t$  (major) = 16.495 min]; HRMS-ESI ( $m/z$ ): calcd for  $\text{C}_{15}\text{H}_{22}\text{NO}_3^+$   $[\text{M}+\text{H}]^+$  264.1594, found 264.1592.

**(S)-1-phenyl-2-(4-phenylpiperazin-1-yl)ethanol (3ad)**

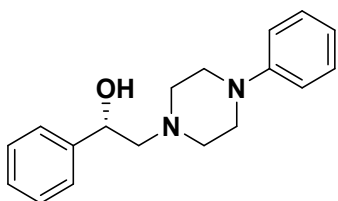

White solid; m.p.= 115-117 °C; 90% yield, 96% *ee*;  $[\alpha]_{\text{D}}^{25} = +62.7$  ( $c = 1.0$ ,  $\text{CHCl}_3$ );  $^1\text{H}$  NMR (600 MHz,  $\text{CDCl}_3$ )  $\delta$  7.41 (d,  $J = 7.8$  Hz, 2H), 7.37 (t,  $J = 7.8$  Hz, 2H), 7.30 (t,  $J = 7.8$  Hz, 3H), 6.96 (d,  $J = 8.4$  Hz, 2H), 6.89 (t,  $J = 7.2$  Hz, 1H), 4.81 (dd,  $J = 10.2, 4.2$  Hz, 1H), 3.99 (brs, 1H), 3.33 – 3.20 (m, 4H), 2.97 – 2.90 (m, 2H), 2.70 – 2.52 (m, 4H).  $^{13}\text{C}$  NMR (150 MHz,  $\text{CDCl}_3$ )  $\delta$  151.2, 142.0, 142.0, 129.2, 128.4, 127.6, 125.9, 120.0, 116.2, 68.8, 66.2, 53.1, 49.4; Determined by HPLC analysis [Daicel chiralpak AD-H, *n*-hexane/*i*-PrOH = 85:15, flow rate = 1 ml/min, wavelength = 225 nm,  $t$  (minor) = 7.893 min,  $t$  (major) = 9.217 min]; HRMS-ESI ( $m/z$ ): calcd for  $\text{C}_{18}\text{H}_{23}\text{N}_2\text{O}^+$   $[\text{M}+\text{H}]^+$  283.1805, found 283.1808.

**(S)-2-morpholino-1-phenylethanol (3ae)**

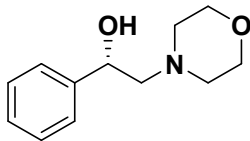

White solid; m.p.= 95-96 °C; 93% yield, 98% *ee*;  $[\alpha]_{\text{D}}^{25} = +42.4$  ( $c = 0.6$ ,  $\text{CHCl}_3$ ) {lit.<sup>[4]</sup>  $[\alpha]_{\text{D}}^{23} = -31.7$  ( $c = 0.4$ ,  $\text{CHCl}_3$ ) (**R**)};  $^1\text{H NMR}$  (400 MHz,  $\text{CDCl}_3$ )  $\delta$  7.41 – 7.27 (m, 5H), 4.76 (dd,  $J = 10.4, 3.6$  Hz, 1H), 3.92 (brs, 1H), 3.82 – 3.70 (m, 4H), 2.83 – 2.70 (m, 2H), 2.58 – 2.41 (m, 4H);  $^{13}\text{C NMR}$  (100 MHz,  $\text{CDCl}_3$ )  $\delta$  141.7, 128.4, 127.6, 125.8, 68.5, 67.0, 66.6, 53.4; Determined by HPLC analysis [Daicel chiralpak OD-H, *n*-hexane/*i*-PrOH = 97:3, flow rate = 0.5 ml/min, wavelength = 225 nm,  $t$  (minor) = 29.014 min,  $t$  (major) = 31.165 min]; HRMS-ESI ( $m/z$ ): calcd for  $\text{C}_{12}\text{H}_{18}\text{NO}_2^+$   $[\text{M}+\text{H}]^+$  208.1332, found 208.1327.

**(S)-1-phenyl-2-(pyrrolidin-1-yl)ethanol (3af)**

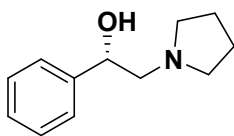

White solid; m.p.= 67-68 °C; 90% yield, 98% *ee*;  $[\alpha]_{\text{D}}^{25} = +50.2$  ( $c = 1.0$ ,  $\text{CHCl}_3$ ) {lit.<sup>[3]</sup>  $[\alpha]_{\text{D}}^{27} = +43.8$  ( $c = 0.96$ ,  $\text{MeOH}$ )};  $^1\text{H NMR}$  (600 MHz,  $\text{CDCl}_3$ )  $\delta$  7.38 (d,  $J = 7.2$  Hz, 2H), 7.33 (t,  $J = 7.6$  Hz, 2H), 7.29 – 7.24 (m, 1H), 4.70 (dd,  $J = 10.8, 3.2$  Hz, 1H), 3.96 (brs, 1H), 2.84 – 2.69 (m, 3H), 2.57 – 2.51 (m, 2H), 2.49 (dd,  $J = 12.4, 3.2$  Hz, 1H), 1.87 – 1.75 (m, 4H);  $^{13}\text{C NMR}$  (150 MHz,  $\text{CDCl}_3$ )  $\delta$  142.5, 128.3, 127.4, 125.9, 70.7, 64.1, 53.9, 23.7; Determined by HPLC analysis [Daicel chiralpak OD-H, *n*-hexane/*i*-PrOH = 97:3, flow rate = 0.5 ml/min, wavelength = 230 nm,  $t$  (minor) = 19.733 min,  $t$  (major) = 22.626 min]; HRMS-ESI ( $m/z$ ): calcd for  $\text{C}_{12}\text{H}_{18}\text{NO}^+$   $[\text{M}+\text{H}]^+$  192.1383, found 192.1394.

**(S)-2-(isoindolin-2-yl)-1-phenylethanol (3ag)**

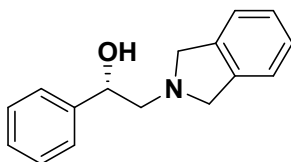

White solid; m.p.= 94-96 °C; 92% yield, 98% *ee*;  $[\alpha]_{\text{D}}^{25} = +32.4$  ( $c = 0.5$ ,  $\text{CHCl}_3$ );  $^1\text{H NMR}$  (400 MHz,  $\text{CDCl}_3$ )  $\delta$  7.46 – 7.33 (m, 4H), 7.32 – 7.26 (m, 1H), 7.23 (s, 4H), 4.80 (dd,  $J = 9.6, 4.0$  Hz, 1H), 4.17 (d,  $J = 11.0$  Hz, 2H), 4.02 (d,  $J = 10.8$  Hz, 2H), 2.99 – 2.87 (m, 2H);  $^{13}\text{C NMR}$  (100 MHz,  $\text{CDCl}_3$ )  $\delta$  142.0, 139.5, 128.4, 127.6, 127.0, 125.9, 122.3, 70.8, 64.1, 59.1; Determined by HPLC analysis [Daicel chiralpak AD-H, *n*-hexane/*i*-PrOH = 85:15, flow rate = 0.5 ml/min, wavelength = 254 nm,  $t$  (minor) = 14.411 min,  $t$  (major) = 16.798 min]; HRMS-ESI ( $m/z$ ): calcd for  $\text{C}_{16}\text{H}_{18}\text{NO}^+$   $[\text{M}+\text{H}]^+$  240.1383, found 240.1377.

### (*S*)-2-(azepan-1-yl)-1-phenylethanol (3ah)

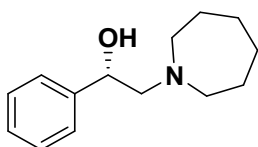

Colorless oil; 93% yield, 95% *ee*;  $[\alpha]_{\text{D}}^{25} = +49.7$  ( $c = 0.5$ ,  $\text{CHCl}_3$ ) {lit.<sup>[4]</sup>  $[\alpha]_{\text{D}}^{27} = -41.8$  ( $c = 0.6$ ,  $\text{CHCl}_3$ )};  $^1\text{H NMR}$  (600 MHz,  $\text{CDCl}_3$ )  $\delta$  7.40 – 7.29 (m, 4H), 7.27 – 7.22 (m, 1H), 4.61 (dd,  $J = 10.8, 3.0$  Hz, 1H), 4.33 (brs, 1H), 2.89 – 2.79 (m, 2H), 2.76 (dd,  $J = 12.6, 3.6$  Hz, 1H), 2.72 – 2.63 (m, 2H), 2.45 – 2.37 (m, 1H), 1.76 – 1.57 (m, 8H);  $^{13}\text{C NMR}$  (150 MHz,  $\text{CDCl}_3$ )  $\delta$  142.6, 128.3, 127.3, 125.9, 69.4, 66.4, 55.6, 28.6, 27.0; Determined by HPLC analysis [Daicel chiralpak AD-H, *n*-hexane/*i*-PrOH = 97:3, flow rate = 0.5 ml/min, wavelength = 230 nm,  $t$  (minor) = 16.653 min,  $t$  (major) = 24.148 min]; HRMS-ESI ( $m/z$ ): calcd for  $\text{C}_{14}\text{H}_{22}\text{NO}^+$   $[\text{M}+\text{H}]^+$  220.1696, found 220.1688.

### (*S*)-2-(dibutylamino)-1-phenylethanol (3ai)

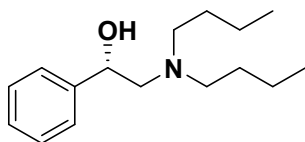

Yellow oil; 84% yield, 71% *ee*;  $[\alpha]_{\text{D}}^{25} = +74.6$  ( $c = 1.0$ ,  $\text{CHCl}_3$ );  $^1\text{H NMR}$  (400 MHz,  $\text{CDCl}_3$ )  $\delta$  7.40 – 7.30 (m, 4H), 7.28 – 7.22 (m, 1H), 4.63 (dd,  $J = 10.8, 3.6$  Hz, 1H), 4.26 (brs, 1H), 2.67 – 2.55 (m, 3H), 2.49 – 2.40 (m, 3H), 1.52 – 1.25 (m, 8H), 0.93 (t,  $J = 7.2$  Hz, 6H);  $^{13}\text{C NMR}$  (100 MHz,  $\text{CDCl}_3$ )  $\delta$  142.6, 128.3, 127.3, 125.8, 69.3, 63.1, 53.7, 29.4, 20.6, 14.1; Determined by HPLC analysis [Daicel chiralpak AD-H, *n*-hexane/*i*-PrOH =



98:2, flow rate = 0.4 ml/min, wavelength = 225 nm,  $t$  (minor) = 10.255 min,  $t$  (major) = 11.966 min]; HRMS-ESI ( $m/z$ ): calcd for  $C_{16}H_{28}NO^+$   $[M+H]^+$  250.2165, found 250.2168.

**(S)-2-(cyclohexylamino)-1-phenylethanol (3aj)**

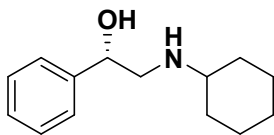

White solid; m.p.= 102-103 °C; 74% yield, 97% *ee*;  $[\alpha]_D^{25} = +25.4$  ( $c = 1.0$ ,  $CHCl_3$ );  $^1H$  NMR (400 MHz,  $CDCl_3$ )  $\delta$  7.43 – 7.30 (m, 4H), 7.29 – 7.23 (m, 1H), 4.65 (dd,  $J = 9.2, 3.6$  Hz, 1H), 2.95 (dt,  $J = 12.0, 2.8$  Hz, 1H), 2.76 (brs, 1H), 2.66 (dd,  $J = 12.0, 9.2$  Hz, 1H), 2.43 (tt,  $J = 10.4, 3.6$  Hz, 1H), 1.89 (d,  $J = 12.0$  Hz, 2H), 1.78 – 1.67 (m, 2H), 1.66 – 1.55 (m, 1H), 1.31 – 0.98 (m, 5H);  $^{13}C$  NMR (100 MHz,  $CDCl_3$ )  $\delta$  142.9, 128.3, 127.4, 125.8, 72.0, 56.5, 54.3, 33.9, 33.6, 26.0, 25.0; Determined by HPLC analysis [Daicel chiralpak IC, *n*-hexane/*i*-PrOH/DEA = 95:5:0.1, flow rate = 1 ml/min, wavelength = 210 nm,  $t$  (minor) = 9.180 min,  $t$  (major) = 12.433 min]; HRMS-ESI ( $m/z$ ): calcd for  $C_{14}H_{22}NO^+$   $[M+H]^+$  220.1696, found 220.1683.

**(S)-2-(cyclopentylamino)-1-phenylethanol (3ak)**

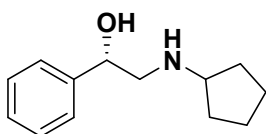

White solid; m.p.= 65-67 °C; 77% yield, 96% *ee*;  $[\alpha]_D^{25} = +32.8$  ( $c = 0.5$ ,  $CHCl_3$ );  $^1H$  NMR (400 MHz,  $CDCl_3$ )  $\delta$  7.39 – 7.30 (m, 4H), 7.29 – 7.23 (m, 1H), 4.75 (dd,  $J = 9.2, 2.4$  Hz, 1H), 3.45 (brs, 2H), 3.12 – 3.01 (m, 1H), 2.90 – 2.79 (m, 1H), 2.68 (dd,  $J = 12.0, 9.6$  Hz, 1H), 1.85 – 1.46 (m, 6H), 1.38 – 1.21 (m, 2H);  $^{13}C$  NMR (100 MHz,  $CDCl_3$ )  $\delta$  143.0, 128.3, 127.4, 125.8, 71.8, 59.6, 56.0, 33.0, 32.8, 24.0, 23.9; Determined by HPLC analysis [Daicel chiralpak IC, *n*-hexane/*i*-PrOH/DEA = 95:5:0.1, flow rate = 1 ml/min, wavelength = 210 nm,  $t$  (minor) = 8.483 min,  $t$  (major) = 11.776 min]; HRMS-ESI ( $m/z$ ): calcd for  $C_{13}H_{20}NO^+$   $[M+H]^+$  206.1539, found 206.1531.

**(S)-2-(benzylamino)-1-phenylethanol (3al)**

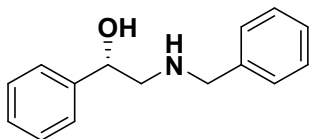

White solid; m.p.= 103-105 °C; 81% yield, 76% *ee*;  $[\alpha]_{\text{D}}^{25} = +43.6$  ( $c = 1.0$ ,  $\text{CHCl}_3$ );  $^1\text{H}$  NMR (400 MHz,  $\text{CDCl}_3$ )  $\delta$  7.39 – 7.23 (m, 10H), 4.73 (dd,  $J = 8.8, 3.6$  Hz, 1H), 3.92 – 3.76 (m, 2H), 2.91 (dt,  $J = 12.4, 2.8$  Hz, 1H), 2.75 (dd,  $J = 12.4, 9.2$  Hz, 1H), 2.65 (brs, 1H);  $^{13}\text{C}$  NMR (100 MHz,  $\text{CDCl}_3$ )  $\delta$  142.5, 139.8, 128.5, 128.4, 128.1, 127.5, 127.2, 125.8, 71.8, 56.5, 53.5. Determined by HPLC analysis [Daicel chiralpak IC, *n*-hexane/*i*-PrOH/DEA = 95:5:0.1, flow rate = 1 ml/min, wavelength = 210 nm,  $t$  (minor) = 13.257 min,  $t$  (major) = 16.547 min]; HRMS-ESI ( $m/z$ ): calcd for  $\text{C}_{15}\text{H}_{18}\text{NO}^+$   $[\text{M}+\text{H}]^+$  228.1383, found 228.1378.

### (*S*)-1-phenyl-2-(phenylamino)ethanol (**3am**)

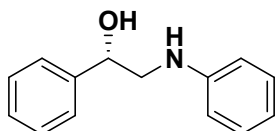

Yellow oil; 57% yield, 95% *ee*;  $[\alpha]_{\text{D}}^{25} = -6.1$  ( $c = 1.0$ ,  $\text{CHCl}_3$ ) {lit.<sup>[4]</sup>  $[\alpha]_{\text{D}}^{23} = +5.7$  ( $c = 1.0$ ,  $\text{CHCl}_3$ ) (**R**)};  $^1\text{H}$  NMR (400 MHz,  $\text{CDCl}_3$ )  $\delta$  7.40 – 7.33 (m, 4H), 7.33 – 7.26 (m, 1H), 7.18 (t,  $J = 7.8$  Hz, 2H), 6.74 (t,  $J = 7.2$  Hz, 1H), 6.65 (d,  $J = 7.8$  Hz, 2H), 4.87 (dd,  $J = 8.8, 4.0$  Hz, 1H), 3.39 (dd,  $J = 13.2, 4.0$  Hz, 1H), 3.25 (dd,  $J = 13.2, 8.8$  Hz, 1H), 3.20 (brs, 1H);  $^{13}\text{C}$  NMR (100 MHz,  $\text{CDCl}_3$ )  $\delta$  147.8, 142.0, 129.3, 128.6, 128.0, 125.9, 118.1, 113.5, 72.4, 51.8; Determined by HPLC analysis [Daicel chiralpak AD-H, *n*-hexane/*i*-PrOH = 90:10, flow rate = 1 ml/min, wavelength = 230 nm,  $t$  (major) = 13.173 min,  $t$  (minor) = 15.853 min]; HRMS-ESI ( $m/z$ ): calcd for  $\text{C}_{14}\text{H}_{16}\text{NO}^+$   $[\text{M}+\text{H}]^+$  214.1226, found 214.1229.

### (*S*)-2-(4-methoxyphenylamino)-1-phenylethanol (**3an**)

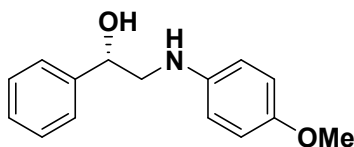

Yellow oil; 61% yield, 96% *ee*;  $[\alpha]_{\text{D}}^{25} = -6.7$  ( $c = 1.0$ ,  $\text{CHCl}_3$ ) {lit.<sup>[4]</sup>  $[\alpha]_{\text{D}}^{23} = +3.1$  ( $c = 1.0$ ,  $\text{CHCl}_3$ ) (**R**)};  $^1\text{H}$  NMR (400 MHz,  $\text{CDCl}_3$ )  $\delta$  7.45 – 7.35 (m, 4H), 7.35 – 7.29 (m, 1H), 6.83

– 6.76 (m, 2H), 6.70 – 6.63 (m, 2H), 4.95 – 4.87 (m, 1H), 3.76 (s, 3H), 3.43 – 3.34 (m, 1H), 3.29 – 3.21 (m, 1H), 3.13 (brs, 1H);  $^{13}\text{C}$  NMR (100 MHz,  $\text{CDCl}_3$ )  $\delta$  152.7, 142.2, 141.9, 128.6, 128.0, 125.9, 115.1, 114.9, 72.4, 55.8, 53.0; Determined by HPLC analysis [Daicel chiralpak AD-H, *n*-hexane/*i*-PrOH = 85:15, flow rate = 1 ml/min, wavelength = 254 nm, *t* (minor) = 12.884 min, *t* (major) = 14.708 min]; HRMS-ESI (*m/z*): calcd for  $\text{C}_{15}\text{H}_{18}\text{NO}_2^+$  [ $\text{M}+\text{H}$ ] $^+$  244.1332, found 244.1338.

### (*S*)-2-(4-chlorophenylamino)-1-phenylethanol (3ao)

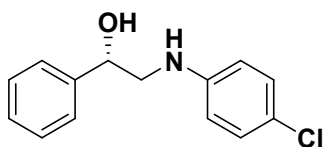

White solid; m.p.= 73-74 °C; 51% yield, 98% *ee*;  $[\alpha]_{\text{D}}^{25} = -17.2$  ( $c = 1.0$ ,  $\text{CHCl}_3$ ) {lit.<sup>[4]</sup>  $[\alpha]_{\text{D}}^{23} = +13.7$  ( $c = 1.0$ ,  $\text{CHCl}_3$ ) (*R*)};  $^1\text{H}$  NMR (600 MHz,  $\text{CDCl}_3$ )  $\delta$  7.40 (d,  $J = 4.8$  Hz, 4H), 7.36 – 7.31 (m, 1H), 7.13 (d,  $J = 8.4$  Hz, 2H), 6.59 (d,  $J = 8.4$  Hz, 2H), 4.91 (dd,  $J = 8.4$ , 4.2 Hz, 1H), 3.38 (dt,  $J = 13.2$ , 3.2 Hz, 1H), 3.32 – 3.25 (m, 1H);  $^{13}\text{C}$  NMR (150 MHz,  $\text{CDCl}_3$ )  $\delta$  146.4, 141.8, 129.2, 128.7, 128.2, 125.9, 122.7, 114.5, 72.5, 51.8; Determined by HPLC analysis [Daicel chiralpak AD-H, *n*-hexane/*i*-PrOH = 90:10, flow rate = 1 ml/min, wavelength = 230 nm, *t* (major) = 16.843 min, *t* (minor) = 18.454 min]; HRMS-ESI (*m/z*): calcd for  $\text{C}_{14}\text{H}_{15}\text{ClNO}^+$  [ $\text{M}+\text{H}$ ] $^+$  248.0837, found 248.0832.

### (*S*)-2-(naphthalen-2-ylamino)-1-phenylethanol (3ap)

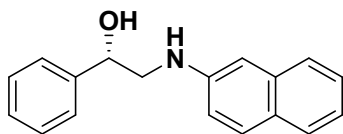

White solid; m.p.= 76-78 °C; 60% yield, 94% *ee*;  $[\alpha]_{\text{D}}^{25} = -28.1$  ( $c = 0.5$ ,  $\text{CHCl}_3$ );  $^1\text{H}$  NMR (400 MHz,  $\text{CDCl}_3$ )  $\delta$  7.65 (d,  $J = 8.0$  Hz, 1H), 7.59 (t,  $J = 8.8$  Hz, 2H), 7.41 – 7.27 (m, 6H), 7.24 – 7.18 (m, 1H), 6.91 – 6.83 (m, 2H), 4.94 (dd,  $J = 8.7$ , 3.9 Hz, 1H), 3.51 (brs, 1H), 3.47 (dd,  $J = 13.2$ , 4.0 Hz, 1H), 3.35 (dd,  $J = 13.2$ , 8.8 Hz, 1H);  $^{13}\text{C}$  NMR (100 MHz,  $\text{CDCl}_3$ )  $\delta$  145.1, 141.9, 135.0, 129.1, 128.6, 128.0, 127.9, 127.6, 126.4, 126.0, 125.9, 122.4, 118.3, 105.7, 72.3, 51.9; Determined by HPLC analysis [Daicel chiralpak IA, *n*-hexane/*i*-PrOH = 90:10, flow rate = 1 ml/min, wavelength = 254 nm, *t* (minor) = 28.247 min, *t*

(major) = 31.015 min]; HRMS-ESI (m/z): calcd for C<sub>18</sub>H<sub>18</sub>NO<sup>+</sup> [M+H]<sup>+</sup> 264.1383, found 264.1385.

**(S)-2-(piperidin-1-yl)-1-*p*-tolylethanol (3ba)**

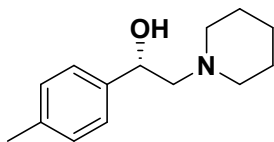

Off white solid; m.p.= 85-86 °C; 90% yield, 97% *ee*; [α]<sub>D</sub><sup>25</sup> = +27.8 (*c* = 0.5, CHCl<sub>3</sub>) {lit.<sup>[4]</sup> [α]<sub>D</sub><sup>23</sup> = -20.3 (*c* = 0.1, CHCl<sub>3</sub>) (**R**)}; <sup>1</sup>H NMR (600 MHz, CDCl<sub>3</sub>) δ 7.26 (d, *J* = 7.8 Hz, 2H), 7.15 (d, *J* = 7.8 Hz, 2H), 4.69 (dd, *J* = 10.8, 3.6 Hz, 1H), 2.69 (s, 2H), 2.46 (dd, *J* = 12.6, 3.6 Hz, 1H), 2.38 (dd, *J* = 12.6, 10.8 Hz, 3H), 2.33 (s, 3H), 1.70 – 1.53 (m, 4H), 1.51 – 1.41 (m, 2H); <sup>13</sup>C NMR (150 MHz, CDCl<sub>3</sub>) δ 139.4, 137.0, 129.0, 125.8, 68.5, 67.0, 54.5, 26.1, 24.3, 21.1; Determined by HPLC analysis [Daicel chiralpak AD-H, *n*-hexane/*i*-PrOH = 95:5, flow rate = 1 ml/min, wavelength = 225 nm, *t* (minor) = 7.128 min, *t* (major) = 8.223 min]; HRMS-ESI (m/z): calcd for C<sub>14</sub>H<sub>22</sub>NO<sup>+</sup> [M+H]<sup>+</sup> 220.1696, found 220.1690.

**(S)-1-(4-methoxyphenyl)-2-(piperidin-1-yl)ethanol (3ca)**

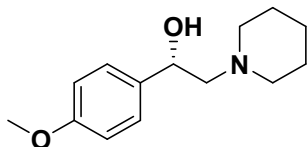

White solid; m.p.= 68-70 °C; 92% yield, 95% *ee*; [α]<sub>D</sub><sup>25</sup> = +34.1 (*c* = 0.5, CHCl<sub>3</sub>) {lit.<sup>[4]</sup> [α]<sub>D</sub><sup>23</sup> = -29.5 (*c* = 0.4, CHCl<sub>3</sub>) (**R**)}; <sup>1</sup>H NMR (400 MHz, CDCl<sub>3</sub>) δ 7.34 – 7.26 (m, 2H), 6.92 – 6.83 (m, 2H), 4.67 (dd, *J* = 10.0, 4.0 Hz, 1H), 3.79 (s, 3H), 2.69 (s, 2H), 2.49 – 2.30 (m, 4H), 1.71 – 1.53 (m, 4H), 1.52 – 1.41 (m, 2H); <sup>13</sup>C NMR (100 MHz, CDCl<sub>3</sub>) δ 159.0, 134.5, 127.1, 113.7, 68.3, 67.0, 55.3, 54.5, 26.1, 24.3; Determined by HPLC analysis [Daicel chiralpak AD-H, *n*-hexane/*i*-PrOH = 90:10, flow rate = 1 ml/min, wavelength = 230 nm, *t* (minor) = 8.251 min, *t* (major) = 9.408 min]; HRMS-ESI (m/z): calcd for C<sub>14</sub>H<sub>22</sub>NO<sub>2</sub><sup>+</sup> [M+H]<sup>+</sup> 236.1645, found 236.1638.

**(S)-1-(4-chlorophenyl)-2-(piperidin-1-yl)ethanol (3da)**

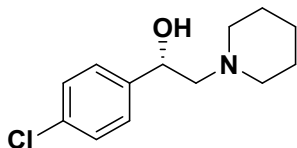

Off white solid; m.p.= 97-98 °C; 93% yield, 97% *ee*;  $[\alpha]_{\text{D}}^{25} = +38.7$  ( $c = 0.5$ ,  $\text{CHCl}_3$ ) {lit.<sup>[4]</sup>  $[\alpha]_{\text{D}}^{23} = -37.5$  ( $c = 0.5$ ,  $\text{CHCl}_3$ ) (*R*)};  $^1\text{H NMR}$  (400 MHz,  $\text{CDCl}_3$ )  $\delta$  7.30 (s, 4H), 4.68 (dd,  $J = 10.8, 3.6$  Hz, 1H), 2.68 (s, 2H), 2.46 (dd,  $J = 12.4, 3.6$  Hz, 1H), 2.42 – 2.26 (m, 3H), 1.70 – 1.53 (m, 4H), 1.52 – 1.41 (m, 2H);  $^{13}\text{C NMR}$  (100 MHz,  $\text{CDCl}_3$ )  $\delta$  141.0, 132.9, 128.4, 127.2, 68.0, 66.8, 54.4, 26.1, 24.2; Determined by HPLC analysis [Daicel chiralpak AD-H, *n*-hexane/*i*-PrOH = 95:5, flow rate = 1 ml/min, wavelength = 230 nm,  $t$  (minor) = 7.302 min,  $t$  (major) = 8.383 min]; HRMS-ESI ( $m/z$ ): calcd for  $\text{C}_{13}\text{H}_{19}\text{ClNO}^+$   $[\text{M}+\text{H}]^+$  240.1150, found 240.1153.

**(S)-2-(piperidin-1-yl)-1-(4-(trifluoromethyl)phenyl)ethanol (3ea)**

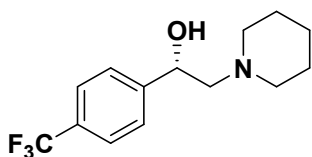

Off white solid; m.p.= 91-93 °C; 81% yield, 93% *ee*;  $[\alpha]_{\text{D}}^{25} = +44.3$  ( $c = 0.5$ ,  $\text{CHCl}_3$ );  $^1\text{H NMR}$  (400 MHz,  $\text{CDCl}_3$ )  $\delta$  7.59 (d,  $J = 8.0$  Hz, 2H), 7.49 (d,  $J = 8.0$  Hz, 2H), 4.76 (dd,  $J = 10.8, 3.6$  Hz, 1H), 4.35 (brs, 1H), 2.69 (s, 2H), 2.51 (dd,  $J = 12.4, 3.6$  Hz, 1H), 2.46 – 2.26 (m, 3H), 1.72 – 1.54 (m, 4H), 1.54 – 1.38 (m, 2H);  $^{13}\text{C NMR}$  (100 MHz,  $\text{CDCl}_3$ )  $\delta$  146.7, 129.5 (q,  $^2J_{\text{C-F}} = 32$  Hz), 126.1, 125.3 (q,  $^3J_{\text{C-F}} = 4$  Hz), 124.2 (q,  $^1J_{\text{C-F}} = 270$  Hz), 68.1, 66.6, 54.4, 26.1, 24.2;  $^{19}\text{F NMR}$  (375 MHz,  $\text{CDCl}_3$ )  $\delta$  -62.4; Determined by HPLC analysis [Daicel chiralpak IA, *n*-hexane/*i*-PrOH = 95:5, flow rate = 0.5 ml/min, wavelength = 225 nm,  $t$  (minor) = 14.738 min,  $t$  (major) = 16.620 min]; HRMS-ESI ( $m/z$ ): calcd for  $\text{C}_{14}\text{H}_{19}\text{F}_3\text{NO}^+$   $[\text{M}+\text{H}]^+$  274.1413, found 274.1411.

**(S)-1-(3-methoxyphenyl)-2-(piperidin-1-yl)ethanol (3fa)**

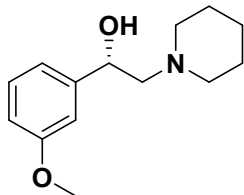

Light yellow oil; 92% yield, 96% *ee*;  $[\alpha]_{\text{D}}^{25} = +46.2$  ( $c = 0.3$ ,  $\text{CHCl}_3$ );  $^1\text{H NMR}$  (400 MHz,  $\text{CDCl}_3$ )  $\delta$  7.24 (t,  $J = 8.0$  Hz, 1H), 6.99 – 6.90 (m, 2H), 6.80 (dd,  $J = 8.0, 2.4$  Hz, 1H), 4.69 (dd,  $J = 10.8, 3.6$  Hz, 1H), 3.80 (s, 3H), 2.68 (s, 2H), 2.48 (dd,  $J = 12.4, 3.6$  Hz, 1H), 2.43 – 2.30 (m, 3H), 1.72 – 1.52 (m, 4H), 1.53 – 1.38 (m, 2H);  $^{13}\text{C NMR}$  (100 MHz,  $\text{CDCl}_3$ )  $\delta$  159.7, 144.3, 129.3, 118.1, 113.0, 111.1, 68.6, 66.9, 55.2, 54.4, 26.1, 24.3; Determined by HPLC analysis [Daicel chiralpak AD-H, *n*-hexane/*i*-PrOH = 90:10, flow rate = 1 ml/min, wavelength = 230 nm,  $t$  (minor) = 7.839 min,  $t$  (major) = 9.696 min]; HRMS-ESI ( $m/z$ ): calcd for  $\text{C}_{14}\text{H}_{22}\text{NO}_2^+$   $[\text{M}+\text{H}]^+$  236.1645, found 236.1643.

**(S)-1-(3-chlorophenyl)-2-(piperidin-1-yl)ethanol (3ga)**

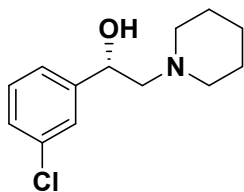

White solid; m.p. = 82-83 °C; 91% yield, 96% *ee*;  $[\alpha]_{\text{D}}^{25} = +87.6$  ( $c = 0.3$ ,  $\text{CHCl}_3$ ) {lit.<sup>[4]</sup>  $[\alpha]_{\text{D}}^{23} = -83.5$  ( $c = 0.2$ ,  $\text{CHCl}_3$ ) (**R**)};  $^1\text{H NMR}$  (400 MHz,  $\text{CDCl}_3$ )  $\delta$  7.39 (s, 1H), 7.30 – 7.19 (m, 3H), 4.68 (dd,  $J = 10.8, 3.2$  Hz, 1H), 4.22 (s, 1H), 2.68 (s, 2H), 2.53 – 2.45 (m, 1H), 2.42 – 2.28 (m, 3H), 1.72 – 1.54 (m, 4H), 1.52 – 1.40 (m, 2H);  $^{13}\text{C NMR}$  (100 MHz,  $\text{CDCl}_3$ )  $\delta$  144.7, 134.2, 129.6, 127.4, 126.0, 124.0, 68.1, 66.7, 54.4, 26.1, 24.2; Determined by HPLC analysis [Daicel chiralpak AD-H, *n*-hexane/*i*-PrOH = 95:5, flow rate = 0.5 ml/min, wavelength = 230 nm,  $t$  (minor) = 15.621 min,  $t$  (major) = 18.374 min]; HRMS-ESI ( $m/z$ ): calcd for  $\text{C}_{13}\text{H}_{19}\text{ClNO}^+$   $[\text{M}+\text{H}]^+$  240.1150, found 240.1159.

**(S)-1-(2-methoxyphenyl)-2-(piperidin-1-yl)ethanol (3ha)**

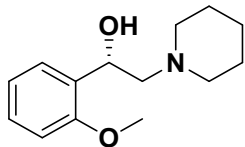

White solid; m.p.= 75-77 °C; 92% yield, 95% *ee*;  $[\alpha]_{\text{D}}^{25} = +53.7$  ( $c = 0.5$ ,  $\text{CHCl}_3$ );  $^1\text{H NMR}$  (400 MHz,  $\text{CDCl}_3$ )  $\delta$  7.55 (d,  $J = 7.6$  Hz, 1H), 7.23 (td,  $J = 8.0, 1.6$  Hz, 1H), 6.98 (t,  $J = 7.6$  Hz, 1H), 6.84 (d,  $J = 8.4$  Hz, 1H), 5.12 (d,  $J = 10.0$  Hz, 1H), 3.81 (s, 3H), 2.69 (s, 2H), 2.61 (dd,  $J = 12.4, 3.2$  Hz, 1H), 2.45 – 2.25 (m, 3H), 1.69 – 1.53 (m, 4H), 1.51 – 1.40 (m, 2H);  $^{13}\text{C NMR}$  (100 MHz,  $\text{CDCl}_3$ )  $\delta$  156.2, 130.8, 127.9, 126.3, 120.7, 110.0, 65.0, 63.6, 55.3, 54.5, 26.2, 24.3; Determined by HPLC analysis [Daicel chiralpak IA, *n*-hexane/*i*-PrOH = 90:10, flow rate = 1 ml/min, wavelength = 225 nm,  $t$  (minor) = 7.353 min,  $t$  (major) = 8.819 min]; HRMS-ESI ( $m/z$ ): calcd for  $\text{C}_{14}\text{H}_{22}\text{NO}_2^+$   $[\text{M}+\text{H}]^+$  236.1645, found 236.1652.

**(S)-1-(naphthalen-2-yl)-2-(piperidin-1-yl)ethanol (3ia)**

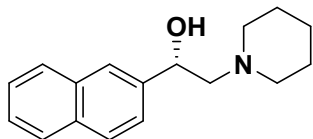

White solid; m.p.= 101-102 °C; 90% yield, 99% *ee*;  $[\alpha]_{\text{D}}^{25} = +53.8$  ( $c = 0.3$ ,  $\text{CHCl}_3$ ) {lit.<sup>[4]</sup>  $[\alpha]_{\text{D}}^{23} = -48.7$  ( $c = 0.4$ ,  $\text{CHCl}_3$ ) (**R**)};  $^1\text{H NMR}$  (400 MHz,  $\text{CDCl}_3$ )  $\delta$  7.88 – 7.78 (m, 4H), 7.51 – 7.40 (m, 3H), 4.89 (dd,  $J = 10.4, 3.6$  Hz, 1H), 4.35 (brs, 1H), 2.73 (s, 2H), 2.57 (dd,  $J = 12.4, 3.6$  Hz, 1H), 2.51 – 2.34 (m, 3H), 1.72 – 1.56 (m, 4H), 1.54 – 1.43 (m, 2H);  $^{13}\text{C NMR}$  (100 MHz,  $\text{CDCl}_3$ )  $\delta$  139.9, 133.4, 133.0, 128.0, 127.9, 127.7, 126.0, 125.6, 124.6, 124.0, 68.7, 66.8, 54.5, 26.1, 24.2; Determined by HPLC analysis [Daicel chiralpak OD-H, *n*-hexane/*i*-PrOH = 98:2, flow rate = 0.5 ml/min, wavelength = 254 nm,  $t$  (minor) = 19.261 min,  $t$  (major) = 21.778 min]; HRMS-ESI ( $m/z$ ): calcd for  $\text{C}_{17}\text{H}_{22}\text{NO}^+$   $[\text{M}+\text{H}]^+$  256.1696, found 256.1694.

**(R)-1-phenoxy-3-(piperidin-1-yl)propan-2-ol (3ja)**

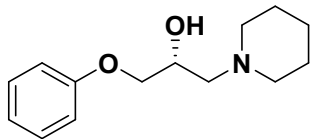

White solid; m.p.= 62-63 °C; 90% yield, 96% *ee*;  $[\alpha]_D^{25} = -41.2$  ( $c = 0.5$ ,  $\text{CHCl}_3$ );  $^1\text{H}$  NMR (600 MHz,  $\text{CDCl}_3$ )  $\delta$  7.33 – 7.29 (m, 2H), 7.00 – 6.92 (m, 3H), 4.11 (m, 1H), 4.04 – 3.96 (m, 2H), 2.64 (s, 2H), 2.55 – 2.49 (m, 2H), 2.41 (s, 2H), 1.69 – 1.56 (m, 4H), 1.49 (m, 2H);  $^{13}\text{C}$  NMR (150 MHz,  $\text{CDCl}_3$ )  $\delta$  158.9, 129.6, 121.0, 114.7, 70.5, 65.5, 61.3, 54.9, 26.2, 24.4; Determined by HPLC analysis [Daicel chiralpak AD-H, *n*-hexane/*i*-PrOH = 90:10, flow rate = 0.8 ml/min, wavelength = 254 nm,  $t$  (major) = 15.366 min,  $t$  (minor) = 18.164 min]; HRMS-ESI ( $m/z$ ): calcd for  $\text{C}_{14}\text{H}_{22}\text{NO}_2^+$   $[\text{M}+\text{H}]^+$  236.1645, found 236.1642.

**(R)-1-(naphthalen-2-yloxy)-3-(piperidin-1-yl)propan-2-ol (3ka)**

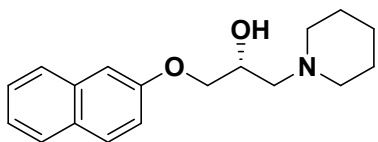

White solid; m.p.= 76-78 °C; 92% yield, 96% *ee*;  $[\alpha]_D^{25} = -28.7$  ( $c = 0.5$ ,  $\text{CHCl}_3$ );  $^1\text{H}$  NMR (600 MHz,  $\text{CDCl}_3$ )  $\delta$  7.80 – 7.68 (m, 3H), 7.43 (t,  $J = 7.2$  Hz, 1H), 7.33 (t,  $J = 7.2$  Hz, 1H), 7.21 – 7.12 (m, 2H), 4.24 – 4.17 (m, 1H), 4.15 – 4.04 (m, 2H), 2.82 – 2.36 (m, 6H), 1.72 – 1.59 (m, 4H), 1.56 – 1.38 (m, 2H);  $^{13}\text{C}$  NMR (150 MHz,  $\text{CDCl}_3$ )  $\delta$  156.8, 134.6, 129.5, 129.2, 127.8, 126.9, 126.5, 123.8, 119.0, 106.9, 70.5, 65.3, 61.5, 54.9, 25.9, 24.2; Determined by HPLC analysis [Daicel chiralpak AD-H, *n*-hexane/*i*-PrOH = 85:15, flow rate = 1 ml/min, wavelength = 254 nm,  $t$  (major) = 8.603 min,  $t$  (minor) = 9.870 min]; HRMS-ESI ( $m/z$ ): calcd for  $\text{C}_{18}\text{H}_{24}\text{NO}_2^+$   $[\text{M}+\text{H}]^+$  286.1802, found 286.1808.

**(S)-1-((4-methoxyphenyl)amino)-3-phenylpropan-2-ol (3ln)**

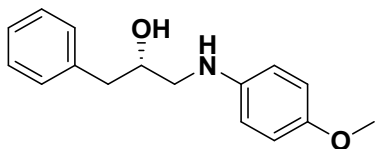

Off white solid; m.p.= 67-68 °C; 68% yield, 96% *ee*;  $[\alpha]_D^{25} = -3.2$  ( $c = 0.5$ ,  $\text{CHCl}_3$ );  $^1\text{H}$  NMR (600 MHz,  $\text{CDCl}_3$ )  $\delta$  7.36 – 7.28 (m, 2H), 7.27 – 7.20 (m, 3H), 6.80 – 6.73 (m, 2H),



6.63 – 6.56 (m, 2H), 4.08 – 4.02 (m, 1H), 3.74 (s, 3H), 3.24 (dd,  $J = 12.6, 3.6$  Hz, 1H), 3.03 (dd,  $J = 12.6, 8.4$  Hz, 1H), 2.91 – 2.77 (m, 3H);  $^{13}\text{C}$  NMR (150 MHz,  $\text{CDCl}_3$ )  $\delta$  152.6, 142.2, 137.8, 129.4, 128.7, 126.7, 114.9, 71.1, 55.8, 50.7, 41.7; Determined by HPLC analysis [Daicel chiralpak IA, *n*-hexane/*i*-PrOH = 90:10, flow rate = 1 ml/min, wavelength = 230 nm,  $t$  (minor) = 12.390 min,  $t$  (major) = 13.989 min]; HRMS-ESI ( $m/z$ ): calcd for  $\text{C}_{16}\text{H}_{19}\text{NNaO}_2^+$  [ $\text{M}+\text{Na}$ ] $^+$  280.1308, found 280.1311.

**(S)-1-(naphthalen-2-yl)-2-(piperidin-1-yl)ethanol (3aq)**

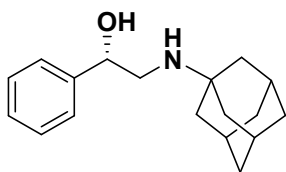

White solid; m.p.= 113-114 °C; 72% yield, 95% *ee*;  $[\alpha]_{\text{D}}^{25} = +53.7$  ( $c = 1.0$ ,  $\text{CHCl}_3$ );  $^1\text{H}$  NMR (400 MHz,  $\text{CDCl}_3$ )  $\delta$  7.40 – 7.30 (m, 4H), 7.29 – 7.23 (m, 1H), 4.58 (dd,  $J = 8.8, 3.6$  Hz, 1H), 2.91 (dd,  $J = 12.0, 3.6$  Hz, 1H), 2.67 (brs, 1H), 2.61 (dd,  $J = 12.0, 8.8$  Hz, 1H), 2.05 (s, 3H), 1.70 – 1.52 (m, 12H);  $^{13}\text{C}$  NMR (100 MHz,  $\text{CDCl}_3$ )  $\delta$  143.1, 128.3, 127.3, 125.8, 72.2, 50.4, 48.2, 43.0, 36.6, 29.5; Determined by HPLC analysis [Daicel chiralpak IC, *n*-hexane/*i*-PrOH/DEA = 95:5:0.1, flow rate = 1 ml/min, wavelength = 210 nm,  $t$  (minor) = 9.708 min,  $t$  (major) = 13.174 min]; HRMS-ESI ( $m/z$ ): calcd for  $\text{C}_{18}\text{H}_{26}\text{NO}^+$  [ $\text{M}+\text{H}$ ] $^+$  272.2009, found 272.2007.

**(S)-3-(2-oxo-2-phenylethyl)-1,2,3,4,5,6-hexahydro-8H-1,5-methanopyrido[1,2-a][1,5]diazocin-8-one (3ar)**

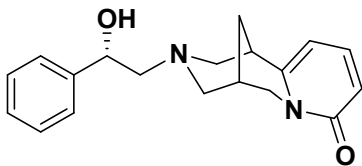

White solid; m.p.= 158-159 °C; 93% yield, 96% *ee*;  $[\alpha]_{\text{D}}^{25} = +46.4$  ( $c = 0.5$ ,  $\text{CHCl}_3$ );  $^1\text{H}$  NMR (400 MHz,  $\text{CDCl}_3$ )  $\delta$  7.35 – 7.17 (m, 6H), 6.49 – 6.41 (m, 1H), 6.01 (d,  $J = 6.8$  Hz, 1H), 4.54 (dd,  $J = 10.0, 3.6$  Hz, 1H), 4.12 (d,  $J = 15.6$  Hz, 1H), 3.88 (dd,  $J = 15.6, 6.4$  Hz, 1H), 3.11 (d,  $J = 10.0$  Hz, 1H), 3.02 (s, 2H), 2.87 (d,  $J = 11.2$  Hz, 1H), 2.61 (d,  $J = 11.2$  Hz, 1H), 2.53 – 2.34 (m, 4H), 2.01 – 1.75 (m, 2H);  $^{13}\text{C}$  NMR (100 MHz,  $\text{CDCl}_3$ )  $\delta$  163.4,

150.5, 141.9, 138.8, 128.2, 127.4, 125.6, 117.0, 104.8, 68.6, 65.5, 61.6, 59.0, 50.0, 35.1, 28.2, 25.8; Determined by HPLC analysis [Daicel chiralpak IB, *n*-hexane/*i*-PrOH = 85:15, flow rate = 1 ml/min, wavelength = 230 nm, *t* (minor) = 24.218 min, *t* (major) = 27.469 min]; HRMS-ESI (*m/z*): calcd for C<sub>19</sub>H<sub>23</sub>N<sub>2</sub>O<sub>2</sub><sup>+</sup> [M+H]<sup>+</sup> 311.1754, found 311.1751.

**(*S*)-1-phenyl-2-(3-(trifluoromethyl)-5,6-dihydro-[1,2,4]triazolo[4,3-*a*]pyrazin-7(8*H*)-yl)ethanol (3as)**

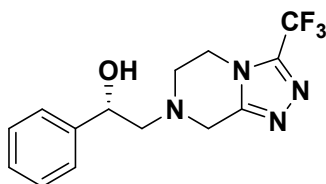

White solid; m.p.= 162-164 °C; 86% yield, 96% *ee*; [ $\alpha$ ]<sub>D</sub><sup>25</sup> = +92.6 (*c* = 0.5, CHCl<sub>3</sub>); <sup>1</sup>H NMR (600 MHz, DMSO-*d*<sub>6</sub>)  $\delta$  7.41 – 7.37 (m, 2H), 7.33 (t, *J* = 7.8 Hz, 2H), 7.27 – 7.21 (m, 1H), 5.28 (d, *J* = 4.2 Hz, 1H), 4.87 – 4.81 (m, 1H), 4.14 (t, *J* = 4.8 Hz, 2H), 4.00 (s, 2H), 3.13 – 3.01 (m, 2H), 2.79 – 2.69 (m, 2H); <sup>13</sup>C NMR (150 MHz, DMSO-*d*<sub>6</sub>)  $\delta$  152.6, 144.2, 142.3 (q, <sup>2</sup>*J*<sub>C-F</sub> = 33 Hz), 128.0, 126.9, 126.1, 118.6 (q, <sup>1</sup>*J*<sub>C-F</sub> = 270 Hz), 70.4, 63.9, 48.7, 48.3, 43.0; <sup>19</sup>F NMR (565 MHz, DMSO-*d*<sub>6</sub>)  $\delta$  -61.92; Determined by HPLC analysis [Daicel chiralpak IC, *n*-hexane/*i*-PrOH/DEA = 80:20:0.1, flow rate = 1 ml/min, wavelength = 220 nm, *t* (minor) = 31.253 min, *t* (major) = 35.349 min]; HRMS-ESI (*m/z*): calcd for C<sub>14</sub>H<sub>16</sub>F<sub>3</sub>N<sub>4</sub>O<sup>+</sup> [M+H]<sup>+</sup> 313.1271, found 313.1270.

**(*S*)-2-(4-(6-fluorobenzo[d]isoxazol-3-yl)piperidin-1-yl)-1-phenylethanol (3at)**

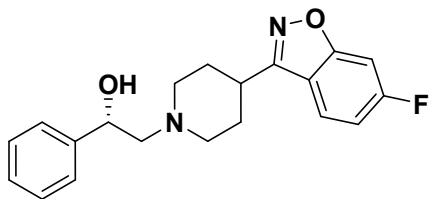

White solid; m.p.= 134-136 °C; 85% yield, 94% *ee*; [ $\alpha$ ]<sub>D</sub><sup>25</sup> = +105.3 (*c* = 1.0, CHCl<sub>3</sub>); <sup>1</sup>H NMR (400 MHz, CDCl<sub>3</sub>)  $\delta$  7.69 (dd, *J* = 8.8, 5.2 Hz, 1H), 7.44 – 7.33 (m, 4H), 7.31 – 7.23 (m, 3H), 7.08 (td, *J* = 8.8, 2.0 Hz, 1H), 4.80 (dd, *J* = 10.4, 3.6 Hz, 1H), 4.08 (brs, 1H), 3.34 (d, *J* = 11.6 Hz, 1H), 3.19 – 3.09 (m, 1H), 3.01 (d, *J* = 11.6 Hz, 1H), 2.66 – 2.50 (m, 3H), 2.30 (td, *J* = 11.4, 3.6 Hz, 1H), 2.24 – 2.04 (m, 4H); <sup>13</sup>C NMR (100 MHz, CDCl<sub>3</sub>)  $\delta$  164.1

(d,  $^1J_{C-F} = 250$  Hz), 163.9 (d,  $^3J_{C-F} = 14$  Hz), 160.8, 142.0, 128.4, 127.6, 125.9, 122.4 (d,  $^3J_{C-F} = 11$  Hz), 117.2, 112.5 (d,  $^2J_{C-F} = 25$  Hz), 97.5 (d,  $^2J_{C-F} = 27$  Hz), 68.8, 66.5, 54.9, 51.9, 34.2, 30.7, 30.4;  $^{19}F$  NMR (375 MHz,  $CDCl_3$ )  $\delta$  -109.4; Determined by HPLC analysis [Daicel chiralpak OD-H, *n*-hexane/*i*-PrOH = 90:10, flow rate = 0.8 ml/min, wavelength = 225 nm, *t* (minor) = 16.092 min, *t* (major) = 18.267 min]; HRMS-ESI (m/z): calcd for  $C_{20}H_{22}FN_2O_2^+$  [M+H] $^+$  341.1660, found 341.1658.

**(S)-2-(4-(benzo[d]isothiazol-3-yl)piperazin-1-yl)-1-phenylethanol (3au)**

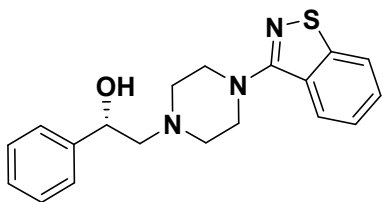

White solid; m.p.= 76-78 °C; 83% yield, 95% *ee*;  $[\alpha]_D^{25} = +82.7$  ( $c = 0.5$ ,  $CHCl_3$ );  $^1H$  NMR (400 MHz,  $CDCl_3$ )  $\delta$  7.90 (d,  $J = 8.0$  Hz, 1H), 7.81 (d,  $J = 8.0$  Hz, 1H), 7.52 – 7.44 (m, 1H), 7.43 – 7.33 (m, 5H), 7.32 – 7.26 (m, 1H), 4.82 (dd,  $J = 10.0, 3.6$  Hz, 1H), 3.97 (brs, 1H), 3.67 – 3.55 (m, 4H), 3.05 – 2.94 (m, 2H), 2.76 – 2.67 (m, 2H), 2.67 – 2.54 (m, 2H);  $^{13}C$  NMR (100 MHz,  $CDCl_3$ )  $\delta$  163.8, 152.8, 141.9, 128.4, 127.9, 127.6, 125.9, 123.9, 123.8, 120.6, 68.8, 66.3, 52.8, 50.1; Determined by HPLC analysis [Daicel chiralpak AD-H, *n*-hexane/*i*-PrOH = 85:15, flow rate = 1 ml/min, wavelength = 225 nm, *t* (minor) = 15.093 min, *t* (major) = 17.956 min]; HRMS-ESI (m/z): calcd for  $C_{19}H_{22}N_3OS^+$  [M+H] $^+$  340.1478, found 340.1481.

**(R)-Naftopidil**

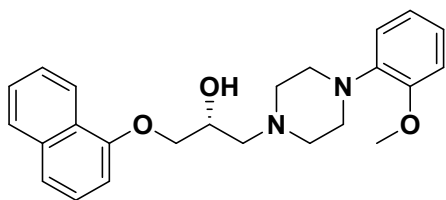

Off white solid; m.p.= 125-127 °C; 86% yield, 95% *ee*;  $[\alpha]_D^{25} = -3.2$  ( $c = 1.5$ , MeOH) {lit.<sup>[5]</sup>  $[\alpha]_D^{27} = -3.0$  ( $c = 1.5$ , MeOH)};  $^1H$  NMR (600 MHz,  $CDCl_3$ )  $\delta$  8.30 – 8.25 (m, 1H), 7.82 – 7.77 (m, 1H), 7.52 – 7.45 (m, 2H), 7.43 (d,  $J = 8.4$  Hz, 1H), 7.36 (t,  $J = 7.8$  Hz, 1H), 7.05 – 6.98 (m, 1H), 6.97 – 6.90 (m, 2H), 6.85 (dd,  $J = 16.8, 7.8$  Hz, 2H), 4.34 – 4.27 (m, 1H),

4.22 (dd,  $J = 9.6, 4.8$  Hz, 1H), 4.16 (dd,  $J = 9.6, 4.8$  Hz, 1H), 3.86 (s, 3H), 3.13 (s, 4H), 2.97 – 2.88 (m, 2H), 2.75 – 2.67 (m, 4H);  $^{13}\text{C}$  NMR (150 MHz,  $\text{CDCl}_3$ )  $\delta$  154.4, 152.3, 141.1, 134.5, 127.5, 126.4, 125.8, 125.6, 125.2, 123.0, 121.9, 121.0, 120.6, 118.2, 111.2, 104.9, 70.6, 65.6, 60.9, 55.4, 53.6, 50.7; Determined by HPLC analysis [Daicel chiralpak AD-H, *n*-hexane/*i*-PrOH/DEA = 80:20:0.1, flow rate = 1 ml/min, wavelength = 230 nm,  $t$  (major) = 7.246 min,  $t$  (minor) = 9.285 min]; HRMS-ESI ( $m/z$ ): calcd for  $\text{C}_{24}\text{H}_{29}\text{N}_2\text{O}_3^+$   $[\text{M}+\text{H}]^+$  393.2173, found 393.2171.

## 5. DFT calculations

Geometric structures of all species were optimized at  $T = 298.15$  K in gas phase by DFT calculation. DFT calculations were performed using the Gaussian 16 package.<sup>[6]</sup> All the structures are optimized using the B3LYP functional with the basis set lanl2dz for Ru and Fe,<sup>[7]</sup> B3LYP/6-311+G (2df, p) for other main group atoms.<sup>[8]</sup> Vibrational analyses were performed to ensure intermediates to have no imaginary frequencies and the transition state structures to have only one imaginary frequency. Transition state structures were confirmed to connect appropriate reactants or products by intrinsic reaction coordinate (IRC) calculations.<sup>[9]</sup> Solvent effects were considered using the SMD mode<sup>[10]</sup> at the B3LYP/6-311+G (d, p) with SDD for Ru and Fe.

Table S3. Calculated energies of transition states.

|                | Electronic Energy (EE) | EE + Thermal Free Energy Correction | $\Delta\Delta G(\text{hatee})$ | $\Delta\Delta G(\text{kcal/mol})$ |
|----------------|------------------------|-------------------------------------|--------------------------------|-----------------------------------|
| <b>TS(S)-1</b> | -9215.375580           | -9214.389590                        | 0.013814                       | 8.63375                           |
| <b>TS(R)-1</b> | -9215.371347           | -9214.384910                        | 0.018494                       | 11.55875                          |
| <b>TS(S)-2</b> | -9215.390462           | -9214.403404                        | 0                              | 0                                 |
| <b>TS(R)-2</b> | -9215.373440           | -9214.386251                        | 0.017153                       | 10.720625                         |

Coordinates for optimized structures:

**TS(S)-1**

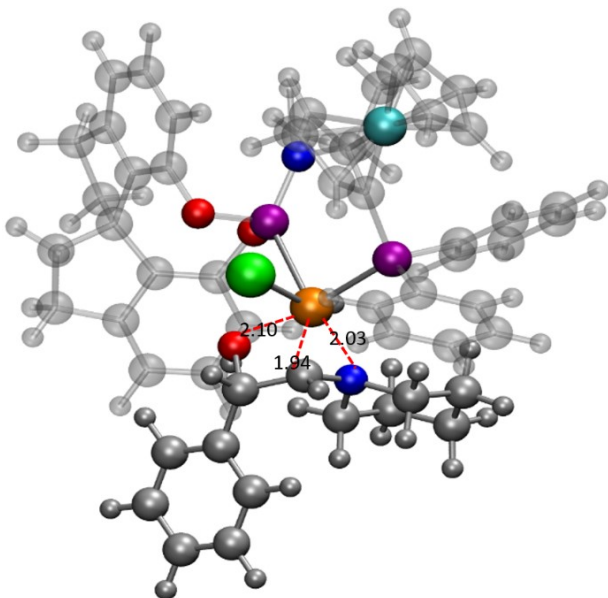

C 2.32883500 -2.04019100 -0.11754800

|   |             |             |             |
|---|-------------|-------------|-------------|
| C | 2.68717000  | -0.71162600 | -0.67361800 |
| C | 2.98357900  | -0.92722100 | -2.10673200 |
| C | 2.76142000  | -2.32696900 | -2.41457900 |
| C | 2.40039100  | -3.00165700 | -1.20579500 |
| C | 1.70669000  | -2.36420500 | 1.25852300  |
| C | 2.44079000  | -3.56491900 | 1.94485600  |
| N | 0.21867500  | -2.68872300 | 1.06589000  |
| P | -0.82236200 | -1.38269900 | 0.46826200  |
| C | -0.38303900 | -3.56040200 | 2.14320700  |
| O | -1.61188900 | -2.01838800 | -0.94799600 |
| C | -1.96556500 | -3.40974100 | -0.81556100 |
| C | -1.03843500 | -4.41770800 | -1.20081500 |
| C | -1.36704100 | -5.77793700 | -1.05830200 |
| C | -2.60547600 | -6.16405100 | -0.49820000 |
| C | -3.52931800 | -5.16769500 | -0.13745900 |
| C | -3.24119100 | -3.79435500 | -0.33665000 |
| C | -4.90494400 | -5.33721300 | 0.53567600  |
| C | -5.22253000 | -3.88905200 | 1.04490400  |
| C | -4.47789900 | -2.93517300 | 0.01367900  |
| C | -5.42559000 | -2.67712800 | -1.23308600 |
| C | -6.35258000 | -1.49716300 | -0.78014100 |
| C | -5.45942700 | -0.72059800 | 0.20726600  |
| C | -4.32151900 | -1.49418200 | 0.56193300  |
| C | -5.64984700 | 0.57551500  | 0.71523200  |
| C | -4.67690700 | 1.11890700  | 1.58715100  |
| C | -3.50700800 | 0.39521300  | 1.89177900  |
| C | -3.29492300 | -0.91056500 | 1.34905400  |
| O | -2.09564700 | -1.62444700 | 1.66795800  |
| P | 2.14944300  | 0.89499900  | 0.09108500  |
| C | 3.09714800  | 2.17914600  | -0.87736700 |
| C | 2.87376500  | 0.87693300  | 1.81522000  |
| C | 1.99496800  | 0.84830200  | 2.92459000  |
| C | 2.49026400  | 0.79724000  | 4.24273400  |
| C | 3.87967600  | 0.77508700  | 4.47482900  |
| C | 4.76558300  | 0.79659700  | 3.37977600  |
| C | 4.26594300  | 0.84301100  | 2.06254900  |
| C | 4.09125200  | 3.01465000  | -0.31849900 |
| C | 4.74553200  | 3.97533100  | -1.11690100 |
| C | 4.41043500  | 4.11649700  | -2.47736400 |
| C | 3.40057300  | 3.30498700  | -3.03413000 |
| C | 2.74131300  | 2.34770700  | -2.23964000 |
| H | 1.83032800  | -1.47998500 | 1.92346800  |
| H | 2.06456700  | -3.73295300 | 2.96339300  |
| H | 2.31984800  | -4.48706100 | 1.35879600  |
| H | 3.51139000  | -3.32832000 | 2.01020300  |
| H | 0.05917500  | -4.56880400 | 2.08268500  |

|    |             |             |             |
|----|-------------|-------------|-------------|
| H  | -0.22733000 | -3.16035800 | 3.16544000  |
| H  | -1.46750000 | -3.64075700 | 1.96693800  |
| H  | -0.06209400 | -4.11278100 | -1.59826100 |
| H  | -0.64069800 | -6.54529700 | -1.35926600 |
| H  | -2.83760400 | -7.22646400 | -0.34434800 |
| H  | -4.87752900 | -6.07179000 | 1.35891900  |
| H  | -5.66373600 | -5.67756900 | -0.19310100 |
| H  | -6.30343800 | -3.68168000 | 1.09222400  |
| H  | -4.79610600 | -3.74568900 | 2.05240200  |
| H  | -4.81722900 | -2.36501400 | -2.09903700 |
| H  | -5.99326700 | -3.57912800 | -1.51152600 |
| H  | -7.26073600 | -1.87277400 | -0.27343600 |
| H  | -6.67702800 | -0.86811200 | -1.62711800 |
| H  | -6.54359000 | 1.15700200  | 0.45224300  |
| H  | -4.83488500 | 2.11114400  | 2.03200400  |
| H  | -2.74945500 | 0.81616000  | 2.56476400  |
| H  | 0.90967400  | 0.85780900  | 2.75202200  |
| H  | 1.78928800  | 0.77335100  | 5.08853600  |
| H  | 4.26952000  | 0.73714500  | 5.50158100  |
| H  | 5.85135000  | 0.77469400  | 3.54774600  |
| H  | 4.97535300  | 0.84819300  | 1.22903400  |
| H  | 4.35662800  | 2.93569000  | 0.74312400  |
| H  | 5.51829900  | 4.61571300  | -0.66964000 |
| H  | 4.92450000  | 4.86352200  | -3.09794000 |
| H  | 3.12009600  | 3.42114200  | -4.09028000 |
| H  | 1.92914900  | 1.73672000  | -2.66619100 |
| C  | 5.81651200  | -1.08756700 | -0.42934500 |
| C  | 5.43512100  | -2.23209300 | 0.37678600  |
| C  | 5.25187800  | -3.36670000 | -0.52953100 |
| C  | 5.51256000  | -2.88583300 | -1.88336200 |
| C  | 5.86869800  | -1.48878100 | -1.80662900 |
| Fe | 4.06714500  | -1.94310300 | -0.96378100 |
| H  | 2.23364900  | -4.07417400 | -1.10197700 |
| H  | 2.91049500  | -2.79559800 | -3.38854300 |
| H  | 3.18949900  | -0.15217600 | -2.84143700 |
| H  | 5.43782900  | -2.26461200 | 1.46626000  |
| H  | 6.06287300  | -0.09106200 | -0.06404200 |
| H  | 5.10376000  | -4.40601900 | -0.23723800 |
| H  | 5.51448500  | -3.49272700 | -2.78908900 |
| H  | 6.10487400  | -0.83888800 | -2.65207500 |
| Ru | -0.27550000 | 1.14837600  | -0.09654100 |
| C  | -0.06497600 | 4.59890300  | 3.10205600  |
| C  | -1.26849700 | 3.65284900  | 2.82890100  |
| C  | -1.61842800 | 3.61951500  | 1.31323100  |
| C  | 0.75083900  | 4.07094200  | 0.72417000  |
| C  | 1.14719800  | 4.17626600  | 2.22392500  |

|    |             |            |             |
|----|-------------|------------|-------------|
| H  | -2.49121900 | 2.97043800 | 1.14306400  |
| H  | -1.03407100 | 2.62985300 | 3.16808200  |
| H  | -2.16302700 | 3.99843600 | 3.37577200  |
| H  | -0.35220700 | 5.63863300 | 2.86818700  |
| H  | 0.21173400  | 4.55727000 | 4.16883500  |
| H  | 1.60214100  | 3.72732000 | 0.11217100  |
| H  | 0.42189300  | 5.06016000 | 0.34846000  |
| H  | 1.54357100  | 3.20774800 | 2.56937000  |
| H  | 1.95743200  | 4.92169100 | 2.30410500  |
| H  | -1.86160000 | 4.63639100 | 0.94927900  |
| C  | -0.60224300 | 2.83442000 | -0.99435300 |
| C  | -2.04524400 | 2.55696000 | -1.48854800 |
| H  | -1.94477100 | 2.16578100 | -2.52823200 |
| O  | -2.28675900 | 1.31575200 | -0.66122700 |
| H  | -3.01165500 | 1.49719500 | 0.03668100  |
| C  | -3.17159200 | 3.61544200 | -1.43912700 |
| C  | -4.52571200 | 3.20707800 | -1.46038300 |
| C  | -2.86189800 | 4.99517600 | -1.47322400 |
| C  | -5.55514900 | 4.16801500 | -1.47862100 |
| H  | -4.77750500 | 2.13775200 | -1.47163200 |
| C  | -3.89317600 | 5.95321000 | -1.50204800 |
| H  | -1.81344500 | 5.32066000 | -1.49437900 |
| C  | -5.24169200 | 5.54211900 | -1.49688200 |
| H  | -6.60463800 | 3.84289100 | -1.49191100 |
| H  | -3.64372000 | 7.02287800 | -1.53187300 |
| H  | -6.04585700 | 6.29055000 | -1.51804700 |
| N  | -0.42622500 | 3.09090900 | 0.47726600  |
| H  | 0.02430700  | 3.46618400 | -1.64180300 |
| Cl | -0.06781100 | 0.26153300 | -2.26309700 |
| H  | -0.67947400 | 0.95086200 | 1.41768700  |



TS(R)-1

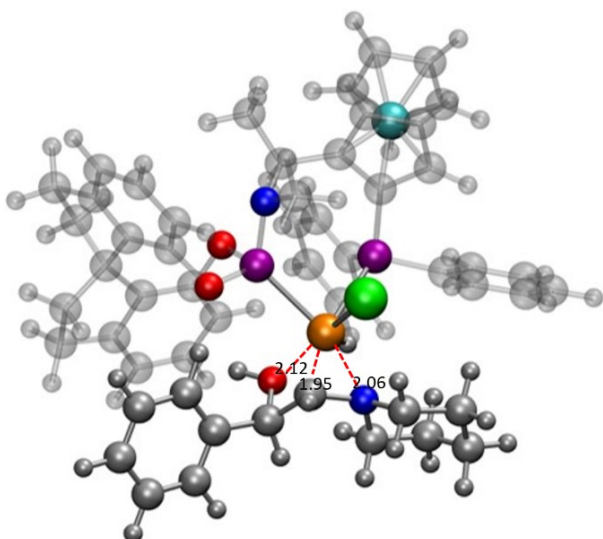

|   |             |             |             |
|---|-------------|-------------|-------------|
| C | 2.16446300  | -2.40032400 | -0.93402300 |
| C | 2.87402700  | -1.15931700 | -0.51468400 |
| C | 4.12249900  | -1.11972200 | -1.30153400 |
| C | 4.14709400  | -2.23874000 | -2.21186100 |
| C | 2.98162500  | -3.03573900 | -1.96756000 |
| C | 0.70563000  | -2.79624200 | -0.63633900 |
| C | 0.42765900  | -4.31917300 | -0.86717300 |
| N | -0.30548600 | -2.00199100 | -1.47781800 |
| P | -1.00987900 | -0.59124200 | -0.65302800 |
| C | 0.14423800  | -1.75775800 | -2.89923300 |
| O | -2.59072500 | -0.54094400 | -1.39942400 |
| C | -3.17619100 | -1.84153900 | -1.65793800 |
| C | -3.10626400 | -2.36441300 | -2.98003200 |
| C | -3.61520700 | -3.64034600 | -3.27723300 |
| C | -4.17120400 | -4.44180100 | -2.25621700 |
| C | -4.28476700 | -3.90879000 | -0.96121400 |
| C | -3.85454500 | -2.58890300 | -0.65975200 |
| C | -4.83668700 | -4.60494600 | 0.29839200  |
| C | -4.39094200 | -3.64450600 | 1.45282800  |
| C | -4.33761000 | -2.21504500 | 0.76662800  |
| C | -5.80326500 | -1.59803000 | 0.74674700  |
| C | -5.95763800 | -0.88873800 | 2.13461000  |
| C | -4.51016700 | -0.48748900 | 2.47411900  |
| C | -3.59516500 | -1.17081100 | 1.63040200  |
| C | -4.06552500 | 0.43622700  | 3.43655900  |
| C | -2.67997100 | 0.68902600  | 3.55150200  |
| C | -1.76061000 | 0.06366600  | 2.68277300  |
| C | -2.21501800 | -0.86356800 | 1.69526100  |
| O | -1.28528900 | -1.51766100 | 0.81794700  |
| P | 2.19058500  | 0.36227500  | 0.31141900  |

|   |             |             |             |
|---|-------------|-------------|-------------|
| C | 3.68612200  | 1.46386500  | 0.19845800  |
| C | 2.02223300  | 0.03033800  | 2.13939000  |
| C | 2.03887900  | 1.12957400  | 3.03511900  |
| C | 1.84525800  | 0.93790600  | 4.41607800  |
| C | 1.61236400  | -0.35554900 | 4.92664800  |
| C | 1.56532700  | -1.45019500 | 4.04315600  |
| C | 1.76397700  | -1.25671900 | 2.66011800  |
| C | 4.63132400  | 1.59377200  | 1.24084600  |
| C | 5.78238900  | 2.38803800  | 1.06265800  |
| C | 6.01124800  | 3.04155800  | -0.16393000 |
| C | 5.08278700  | 2.89816200  | -1.21504400 |
| C | 3.92434300  | 2.11682000  | -1.03501500 |
| H | 0.44398200  | -2.56864700 | 0.41665700  |
| H | -0.60663900 | -4.54822700 | -0.57124000 |
| H | 0.55530100  | -4.59119800 | -1.92450800 |
| H | 1.11689900  | -4.92523400 | -0.25980100 |
| H | 1.11037200  | -1.22540100 | -2.97379200 |
| H | 0.23095100  | -2.73759700 | -3.40065600 |
| H | -0.61856400 | -1.15959900 | -3.42226900 |
| H | -2.63953700 | -1.76076400 | -3.76852200 |
| H | -3.54634600 | -4.02511900 | -4.30399500 |
| H | -4.51662700 | -5.46124800 | -2.47512500 |
| H | -4.42555200 | -5.62206400 | 0.41998700  |
| H | -5.93791100 | -4.69234000 | 0.25421700  |
| H | -5.07922300 | -3.66242900 | 2.31294900  |
| H | -3.38283400 | -3.92173700 | 1.80492600  |
| H | -5.87505800 | -0.84997400 | -0.05981800 |
| H | -6.57014500 | -2.36983200 | 0.57686100  |
| H | -6.35874100 | -1.58138400 | 2.89767900  |
| H | -6.62935600 | -0.01430800 | 2.08738000  |
| H | -4.77969000 | 0.95556600  | 4.08983200  |
| H | -2.31039700 | 1.39106900  | 4.31192900  |
| H | -0.68480600 | 0.26329500  | 2.77786400  |
| H | 2.20911300  | 2.14614700  | 2.65560500  |
| H | 1.87614500  | 1.80144800  | 5.09473700  |
| H | 1.46202700  | -0.50670100 | 6.00441100  |
| H | 1.37188200  | -2.46119700 | 4.42747600  |
| H | 1.71805200  | -2.12440300 | 1.99264900  |
| H | 4.48039700  | 1.07678500  | 2.19759100  |
| H | 6.50663400  | 2.48574200  | 1.88316100  |
| H | 6.91352900  | 3.65285900  | -0.30359600 |
| H | 5.26295400  | 3.39180100  | -2.18003100 |
| H | 3.20507900  | 1.99328100  | -1.85978200 |
| C | 4.49318500  | -2.77564600 | 1.64923300  |
| C | 3.73637200  | -3.93991700 | 1.25684100  |
| C | 4.39382700  | -4.53758200 | 0.10466300  |

|    |             |             |             |
|----|-------------|-------------|-------------|
| C  | 5.56013300  | -3.71928100 | -0.21038600 |
| C  | 5.61263800  | -2.62846100 | 0.75126500  |
| Fe | 3.93204800  | -2.70936100 | -0.29717100 |
| H  | 2.73502300  | -3.96413100 | -2.48079800 |
| H  | 4.95110100  | -2.47559100 | -2.91001900 |
| H  | 4.85548400  | -0.31617700 | -1.28459100 |
| H  | 2.86157600  | -4.33729700 | 1.77376300  |
| H  | 4.25284400  | -2.11197000 | 2.48160800  |
| H  | 4.12960200  | -5.48739800 | -0.36053700 |
| H  | 6.32111200  | -3.94863300 | -0.95616500 |
| H  | 6.38859400  | -1.86437600 | 0.81662600  |
| Ru | -0.03213300 | 1.72686900  | -0.50052600 |
| C  | 2.13714800  | 5.97403600  | -0.58606800 |
| C  | 1.57047200  | 5.21188700  | 0.64470600  |
| C  | 0.11464100  | 4.73331500  | 0.37692500  |
| C  | 0.62256500  | 4.50591100  | -2.06486300 |
| C  | 2.05678500  | 5.05972300  | -1.84115000 |
| H  | -0.27623700 | 4.19950600  | 1.25894000  |
| H  | 2.20281900  | 4.33693400  | 0.87300400  |
| H  | 1.55594500  | 5.86486000  | 1.53472100  |
| H  | 1.55420300  | 6.89664200  | -0.75126400 |
| H  | 3.18448700  | 6.26487100  | -0.39927600 |
| H  | 0.61446900  | 3.77455000  | -2.89129700 |
| H  | -0.08349300 | 5.33221600  | -2.28082100 |
| H  | 2.75488500  | 4.21653500  | -1.72672900 |
| H  | 2.34543900  | 5.62009000  | -2.74720500 |
| H  | -0.53466700 | 5.60316600  | 0.15177400  |
| C  | -1.26094100 | 3.09502900  | -1.14285300 |
| C  | -2.28849000 | 3.21879700  | 0.01816500  |
| H  | -2.26644000 | 4.20910700  | 0.52291500  |
| O  | -1.52780300 | 2.26776300  | 0.90621300  |
| H  | -2.12781100 | 1.64971600  | 1.45242000  |
| C  | -3.77021800 | 2.91864400  | -0.27324000 |
| C  | -4.70940500 | 3.90875300  | 0.11527600  |
| C  | -4.22325000 | 1.76907900  | -0.96264900 |
| C  | -6.07521200 | 3.76394300  | -0.18655800 |
| H  | -4.36371300 | 4.80524900  | 0.64891400  |
| C  | -5.59264600 | 1.63316000  | -1.26706900 |
| H  | -3.52754200 | 0.95245700  | -1.24528400 |
| C  | -6.51934300 | 2.62474100  | -0.88778100 |
| H  | -6.78948200 | 4.54125400  | 0.11727800  |
| H  | -5.93827300 | 0.74822400  | -1.81900300 |
| H  | -7.58370800 | 2.51099500  | -1.13685800 |
| N  | 0.06332200  | 3.76299500  | -0.82515500 |
| H  | -1.63017400 | 3.30754100  | -2.15763200 |
| Cl | 0.79120700  | 1.43041100  | -2.63819800 |

H 0.67141000 2.16138600 0.77096300

**TS(S)-2**

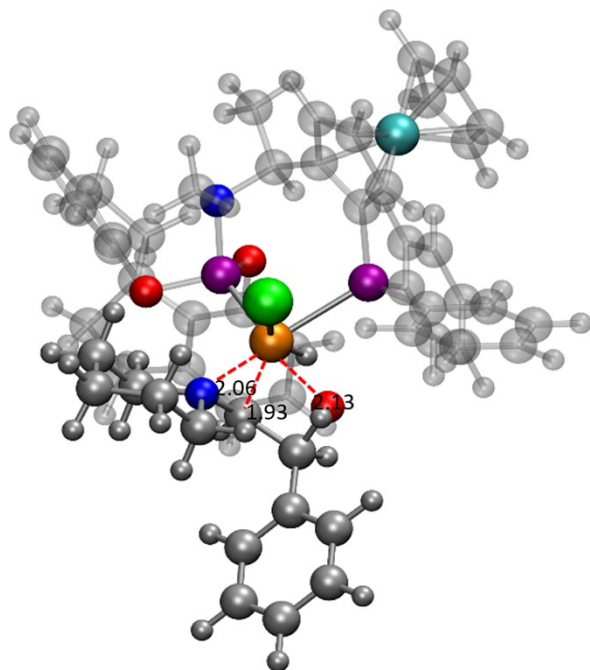

C 1.81067900 -2.50790200 -1.12017000  
C 2.59219800 -1.34530800 -0.61397200  
C 3.76881800 -1.21275700 -1.49340200  
C 3.69586500 -2.21634000 -2.52633600  
C 2.53825300 -3.02648200 -2.27920500  
C 0.36654800 -2.92054500 -0.75903300  
C 0.07439400 -4.42750000 -1.06607500  
N -0.70993000 -2.08776900 -1.48469300  
P -1.27933300 -0.67263100 -0.53891600  
C -0.31552700 -1.70597300 -2.89730700  
O -2.93593800 -0.49641600 -1.08844200  
C -3.60902100 -1.74592400 -1.36133500  
C -3.64302400 -2.25799100 -2.68935300  
C -4.26201600 -3.48959600 -2.96566300  
C -4.83328700 -4.25540900 -1.92506900  
C -4.83874900 -3.73090300 -0.62152300  
C -4.28258700 -2.45666100 -0.33897400  
C -5.38073300 -4.38126200 0.66648700  
C -4.77673200 -3.47663400 1.79497500  
C -4.62044700 -2.05103700 1.11391400  
C -6.00723300 -1.27958500 1.19862200  
C -5.98988100 -0.59513400 2.60656300  
C -4.48691800 -0.36516100 2.85463800  
C -3.70672700 -1.10352100 1.92725900

|   |             |             |             |
|---|-------------|-------------|-------------|
| C | -3.88893300 | 0.45696500  | 3.82492400  |
| C | -2.48100600 | 0.54172300  | 3.86883800  |
| C | -1.69413100 | -0.13209100 | 2.91810800  |
| C | -2.29786400 | -0.93490100 | 1.90864500  |
| O | -1.47696900 | -1.61416300 | 0.93500500  |
| P | 2.02018400  | 0.07065600  | 0.43268000  |
| C | 3.55332500  | 1.13847600  | 0.49816600  |
| C | 1.86503200  | -0.48355200 | 2.20625000  |
| C | 1.65256000  | -1.82713100 | 2.58057200  |
| C | 1.50699200  | -2.17978800 | 3.93912400  |
| C | 1.56826400  | -1.19204500 | 4.93982200  |
| C | 1.76309600  | 0.15635100  | 4.57478900  |
| C | 1.90074100  | 0.50840200  | 3.21921800  |
| C | 4.51050100  | 0.96872600  | 1.52623700  |
| C | 5.67993400  | 1.75422100  | 1.54895100  |
| C | 5.91301400  | 2.70990700  | 0.54048400  |
| C | 4.97434700  | 2.86726000  | -0.49841500 |
| C | 3.80263800  | 2.08569100  | -0.52202400 |
| H | 0.17210800  | -2.75529200 | 0.32023200  |
| H | -0.94056600 | -4.67693700 | -0.72346300 |
| H | 0.13684500  | -4.63145600 | -2.14445000 |
| H | 0.79745800  | -5.07050500 | -0.54170100 |
| H | 0.57098200  | -1.04428900 | -2.95527200 |
| H | -0.11719900 | -2.63292500 | -3.46038800 |
| H | -1.16483700 | -1.18840600 | -3.37209000 |
| H | -3.17453300 | -1.68712900 | -3.50043400 |
| H | -4.27250500 | -3.86960200 | -3.99641100 |
| H | -5.27066000 | -5.24050700 | -2.13671900 |
| H | -5.06572800 | -5.43480100 | 0.76198300  |
| H | -6.48607800 | -4.35876800 | 0.68590700  |
| H | -5.41144000 | -3.43619000 | 2.69451000  |
| H | -3.78189600 | -3.85450200 | 2.08577000  |
| H | -6.04722800 | -0.51031800 | 0.40885300  |
| H | -6.86407900 | -1.95866100 | 1.06512300  |
| H | -6.41883600 | -1.26022400 | 3.37869900  |
| H | -6.56230300 | 0.34845100  | 2.62224100  |
| H | -4.50397400 | 1.01693700  | 4.54218600  |
| H | -1.99168900 | 1.15448200  | 4.63806700  |
| H | -0.60303100 | -0.04404400 | 2.94994900  |
| H | 1.60274800  | -2.61424300 | 1.82004300  |
| H | 1.34565200  | -3.23192200 | 4.21166500  |
| H | 1.45946000  | -1.46827300 | 5.99770700  |
| H | 1.80654000  | 0.93650500  | 5.34725600  |
| H | 2.04884700  | 1.56358500  | 2.95136100  |
| H | 4.35018800  | 0.22706500  | 2.31937000  |
| H | 6.41183000  | 1.61354200  | 2.35631200  |

|    |             |             |             |
|----|-------------|-------------|-------------|
| H  | 6.82649700  | 3.32045700  | 0.55900700  |
| H  | 5.15809900  | 3.59562200  | -1.30036500 |
| H  | 3.08829300  | 2.17735800  | -1.35492100 |
| C  | 4.33068000  | -3.20979000 | 1.20491900  |
| C  | 3.53640200  | -4.32044100 | 0.73970200  |
| C  | 4.09579600  | -4.77995900 | -0.52106900 |
| C  | 5.24213300  | -3.93088100 | -0.82951900 |
| C  | 5.37921100  | -2.95915600 | 0.24476500  |
| Fe | 3.62693600  | -2.91095500 | -0.66906500 |
| H  | 2.23435200  | -3.88495700 | -2.87661700 |
| H  | 4.43403500  | -2.37746900 | -3.31321800 |
| H  | 4.51010500  | -0.41736200 | -1.43956200 |
| H  | 2.69754500  | -4.77193500 | 1.27176900  |
| H  | 4.16273700  | -2.65072200 | 2.12700400  |
| H  | 3.78499600  | -5.66755200 | -1.07257100 |
| H  | 5.94143900  | -4.07379200 | -1.65323200 |
| H  | 6.16723700  | -2.21080100 | 0.33924100  |
| Ru | -0.06205900 | 1.32214500  | -0.41311000 |
| C  | -2.40648100 | 3.22684100  | -4.10448800 |
| C  | -0.99285200 | 3.65067600  | -3.62378000 |
| C  | -0.96725200 | 3.89161800  | -2.08619800 |
| C  | -2.81453000 | 2.23914000  | -1.76154100 |
| C  | -2.86506200 | 1.98331600  | -3.29514400 |
| H  | 0.05384000  | 4.18072100  | -1.78843900 |
| H  | -0.25255700 | 2.86741200  | -3.85939300 |
| H  | -0.67961700 | 4.59037400  | -4.11094000 |
| H  | -3.12101700 | 4.05517500  | -3.95653700 |
| H  | -2.38083600 | 2.98914600  | -5.18108500 |
| H  | -3.10093300 | 1.29767500  | -1.24447000 |
| H  | -3.49492700 | 3.06721700  | -1.48121100 |
| H  | -2.21800800 | 1.12274900  | -3.53583100 |
| H  | -3.90293400 | 1.70955200  | -3.55318200 |
| H  | -1.65874900 | 4.70888400  | -1.80218200 |
| C  | -1.29521600 | 2.66227200  | 0.22077700  |
| C  | -0.27000800 | 3.66589900  | 0.82493100  |
| H  | -0.18590200 | 3.42022900  | 1.90888500  |
| O  | 0.98022400  | 3.06830500  | 0.21834600  |
| H  | 1.27985700  | 3.69695500  | -0.52454800 |
| C  | -0.38115900 | 5.20101600  | 0.65906500  |
| C  | 0.78743800  | 5.99674000  | 0.62179800  |
| C  | -1.65085500 | 5.82292000  | 0.62053000  |
| C  | 0.68599200  | 7.39787100  | 0.51721200  |
| H  | 1.77964200  | 5.52875600  | 0.68922800  |
| C  | -1.74797200 | 7.22414500  | 0.52556600  |
| H  | -2.56235500 | 5.21267900  | 0.67384000  |
| C  | -0.58067500 | 8.01359900  | 0.46674800  |

|    |             |            |             |
|----|-------------|------------|-------------|
| H  | 1.59840400  | 8.00945900 | 0.48528700  |
| H  | -2.73734700 | 7.70150900 | 0.49739600  |
| H  | -0.65881900 | 9.10695500 | 0.38982700  |
| N  | -1.39115500 | 2.63143400 | -1.28487700 |
| H  | -2.26598400 | 2.60436700 | 0.73752200  |
| Cl | 1.18033700  | 1.36422900 | -2.41621600 |
| H  | -0.15016800 | 1.10598300 | 1.13445400  |

### TS(R)-2

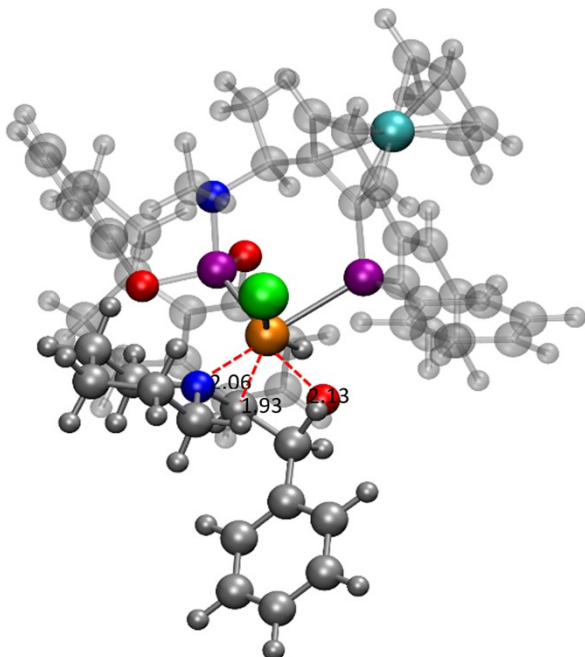

|   |             |             |             |
|---|-------------|-------------|-------------|
| C | 1.16232400  | -2.64833800 | -0.72260400 |
| C | 2.20756200  | -1.62295800 | -0.48120600 |
| C | 3.03781900  | -1.57631300 | -1.70445000 |
| C | 2.51061900  | -2.53948900 | -2.65290200 |
| C | 1.39210900  | -3.19957000 | -2.04586200 |
| C | 0.03910400  | -3.09067100 | 0.23605700  |
| C | -0.27451800 | -4.61621300 | 0.00017400  |
| N | -1.31232000 | -2.34131900 | 0.13066900  |
| P | -1.48025000 | -0.55882600 | 0.09226800  |
| C | -2.27454600 | -2.99621800 | 1.11695900  |
| O | -2.77522300 | -0.31103900 | -1.06400700 |
| C | -3.77012500 | -1.35702600 | -1.06108500 |
| C | -3.60369900 | -2.46731600 | -1.93501700 |
| C | -4.52466200 | -3.52990500 | -1.91528300 |
| C | -5.59511000 | -3.53312100 | -0.99235400 |
| C | -5.76641800 | -2.42776000 | -0.14070300 |
| C | -4.89986500 | -1.30560800 | -0.20703400 |
| C | -6.78913900 | -2.25267700 | 0.99979500  |

|   |             |             |             |
|---|-------------|-------------|-------------|
| C | -6.18827100 | -1.06008500 | 1.82178500  |
| C | -5.42067700 | -0.19027600 | 0.73678700  |
| C | -6.47775200 | 0.75138500  | 0.01409300  |
| C | -6.57318400 | 2.01474300  | 0.93400000  |
| C | -5.17388700 | 2.07867200  | 1.57559100  |
| C | -4.47093900 | 0.86218300  | 1.37051500  |
| C | -4.59301100 | 3.15753500  | 2.26529900  |
| C | -3.27323700 | 3.02941400  | 2.75147800  |
| C | -2.53515400 | 1.85889300  | 2.50244000  |
| C | -3.11553600 | 0.77061500  | 1.78737300  |
| O | -2.35542700 | -0.43178100 | 1.61291400  |
| P | 2.01802200  | -0.12361300 | 0.57370200  |
| C | 3.77831400  | 0.48308300  | 0.73186000  |
| C | 1.64580700  | -0.63736900 | 2.32653300  |
| C | 1.11400200  | 0.32431000  | 3.21735400  |
| C | 0.86587400  | -0.00228000 | 4.56502500  |
| C | 1.15055900  | -1.29684400 | 5.04367400  |
| C | 1.69639400  | -2.25657200 | 4.16919700  |
| C | 1.94889200  | -1.92629400 | 2.82216000  |
| C | 4.58991400  | 0.07147700  | 1.81448700  |
| C | 5.93511000  | 0.48264500  | 1.89167300  |
| C | 6.48537600  | 1.30396200  | 0.88753100  |
| C | 5.67965200  | 1.72153800  | -0.19007400 |
| C | 4.33333900  | 1.31413000  | -0.26734700 |
| H | 0.40977300  | -2.97798700 | 1.27914400  |
| H | -0.81446400 | -5.04903300 | 0.85179700  |
| H | -0.88056100 | -4.74368100 | -0.90821100 |
| H | 0.66616400  | -5.16856600 | -0.12077700 |
| H | -2.71602800 | -3.89378800 | 0.65310100  |
| H | -1.76171800 | -3.28306700 | 2.05464500  |
| H | -3.07624300 | -2.28954400 | 1.37267500  |
| H | -2.73429200 | -2.48860800 | -2.60612900 |
| H | -4.38492000 | -4.38152300 | -2.59515400 |
| H | -6.27491100 | -4.39407500 | -0.93556300 |
| H | -6.89054400 | -3.16919900 | 1.60629500  |
| H | -7.79021100 | -1.99986300 | 0.60456000  |
| H | -6.95835500 | -0.47448500 | 2.34868200  |
| H | -5.47029800 | -1.44212900 | 2.56749300  |
| H | -6.09920100 | 1.03732100  | -0.98100300 |
| H | -7.44881500 | 0.24893600  | -0.11673700 |
| H | -7.35371000 | 1.88764100  | 1.70675700  |
| H | -6.81191300 | 2.93097300  | 0.36667400  |
| H | -5.15629800 | 4.08655200  | 2.42672200  |
| H | -2.81088900 | 3.85473000  | 3.31007600  |
| H | -1.50206900 | 1.76497600  | 2.85959600  |
| H | 0.89262200  | 1.33860200  | 2.85947500  |



|    |             |             |             |
|----|-------------|-------------|-------------|
| H  | 0.45177500  | 0.75713700  | 5.24268000  |
| H  | 0.95574800  | -1.55328400 | 6.09433900  |
| H  | 1.93535200  | -3.26447300 | 4.53594900  |
| H  | 2.39696100  | -2.67683300 | 2.16163500  |
| H  | 4.17658800  | -0.56514500 | 2.60788400  |
| H  | 6.55428600  | 0.15812400  | 2.73941500  |
| H  | 7.53547000  | 1.62177000  | 0.94872800  |
| H  | 6.09843300  | 2.37057600  | -0.97145800 |
| H  | 3.68483400  | 1.66613000  | -1.08256600 |
| C  | 4.35276500  | -3.58484200 | 0.59385500  |
| C  | 3.32062900  | -4.59686600 | 0.49435400  |
| C  | 3.34968200  | -5.12974500 | -0.86656400 |
| C  | 4.40001100  | -4.41710800 | -1.58952300 |
| C  | 5.01465200  | -3.47452400 | -0.67799200 |
| Fe | 3.02679600  | -3.24875000 | -0.88840200 |
| H  | 0.82167600  | -4.01266800 | -2.49674200 |
| H  | 2.90559400  | -2.74306100 | -3.64878200 |
| H  | 3.81749900  | -0.84584900 | -1.91215400 |
| H  | 2.71906100  | -4.97659600 | 1.32090300  |
| H  | 4.59845700  | -3.00250500 | 1.48344700  |
| H  | 2.79944400  | -5.99785100 | -1.22948300 |
| H  | 4.73055400  | -4.62324600 | -2.60763300 |
| H  | 5.83481300  | -2.79383500 | -0.91319700 |
| Ru | 0.25623100  | 1.22466500  | -0.57773300 |
| C  | -3.49883300 | 2.79170800  | -3.17497700 |
| C  | -2.11340300 | 2.38575300  | -3.74807100 |
| C  | -0.95365700 | 3.05349900  | -2.95369800 |
| C  | -2.36669300 | 3.11459000  | -0.89967300 |
| C  | -3.54557800 | 2.45178700  | -1.66041100 |
| H  | 0.00150700  | 2.70902800  | -3.38220200 |
| H  | -1.97881200 | 1.29183900  | -3.69654400 |
| H  | -2.01957900 | 2.69636800  | -4.80324200 |
| H  | -3.66623200 | 3.87220900  | -3.32901200 |
| H  | -4.29609800 | 2.24737500  | -3.70836200 |
| H  | -2.38480000 | 2.84588900  | 0.17083700  |
| H  | -2.40856400 | 4.21888600  | -0.99210200 |
| H  | -3.46181000 | 1.35664200  | -1.51055400 |
| H  | -4.48454800 | 2.81084800  | -1.20859100 |
| H  | -1.01385500 | 4.15876200  | -3.02215700 |
| C  | 0.11302400  | 3.14979600  | -0.54916500 |
| C  | 1.39957900  | 3.55250700  | -1.31446400 |
| H  | 1.24788800  | 4.05719700  | -2.29151600 |
| O  | 1.84285800  | 2.10967900  | -1.57206900 |
| H  | 1.72000300  | 1.86384200  | -2.56181500 |
| C  | 2.46150700  | 4.31901900  | -0.51148800 |
| C  | 3.30364600  | 5.23449700  | -1.18787600 |

|    |             |            |             |
|----|-------------|------------|-------------|
| C  | 2.60891700  | 4.14236800 | 0.88567600  |
| C  | 4.27815300  | 5.96241400 | -0.47910300 |
| H  | 3.19050000  | 5.38385500 | -2.27087500 |
| C  | 3.58407400  | 4.87071100 | 1.59233000  |
| H  | 1.95622500  | 3.43896500 | 1.41972100  |
| C  | 4.41952300  | 5.78095800 | 0.91177300  |
| H  | 4.92430100  | 6.67410700 | -1.01115100 |
| H  | 3.69147100  | 4.73142300 | 2.67675400  |
| H  | 5.17762100  | 6.35158900 | 1.46639000  |
| N  | -0.99700300 | 2.66568200 | -1.45567100 |
| H  | -0.22443500 | 3.86752600 | 0.21314800  |
| Cl | 0.30526600  | 0.05092800 | -2.63401100 |
| H  | -0.06607200 | 1.46951200 | 0.94637900  |

## 6. References

- [1] L. Yin, J. Xing, Y. Wang, Y. Shen, T. Lu, T. Hayashi, X. Dou, *Angew. Chem. Int. Ed.* **2019**, *58*, 2474-2478.
- [2] a) H. Seo, H.-j. Park, B. Y. Kim, J. H. Lee, S. U. Son, Y. K. Chung, *Organometallics* **2003**, *22*, 618-620; b) S. Gischig, A. Togni, *Organometallics* **2004**, *23*, 2479-2487; c) R. T. Stemmler, C. Bolm, *Synlett* **2007**, *2007*, 1365-1370; d) F.-Z. Han, S.-B. Yu, C. Zhang, X.-P. Hu, *Tetrahedron* **2016**, *72*, 2616-2622.
- [3] P. Saravanan, A. Bisai, S. Baktharaman, M. Chandrasekhar, V. K. Singh, *Tetrahedron* **2002**, *58*, 4693-4706.
- [4] L.-C. Yang, Y.-N. Wang, Y. Zhang, Y. Zhao, *ACS Catal.* **2016**, *7*, 93-97.
- [5] M. Kumar, R. I. Kureshy, A. K. Shah, A. Das, N.-u. H. Khan, S. H. R. Abdi, H. C. Bajaj, *J. Org. Chem.* **2013**, *78*, 9076-9084.
- [6] Gaussian 16 (Wallingford, CT, 2016).
- [7] a) M. Dolg, U. Wedig, H. Stoll, H. Preuss, *J. Chem. Phys.* **1987**, *86*, 866-872; b) D. Andrae, U. Häußermann, M. Dolg, H. Stoll, H. Preuß, *Theor. Chem. Acc.* **1990**, *77*, 123-141.
- [8] P. J. Hay, W. R. Wadt, *J. Chem. Phys.* **1985**, *82*, 299-310.
- [9] K. Fukui, The path of chemical reactions-the IRC approach. *Acc. Chem. Res.* **1981**, *14*, 363-368.
- [10] A. V. Marenich, C. J. Cramer, D. G. Truhlar, *J. Phys. Chem. B* **2009**, *113*, 6378-6396.

## 7. NMR spectrum

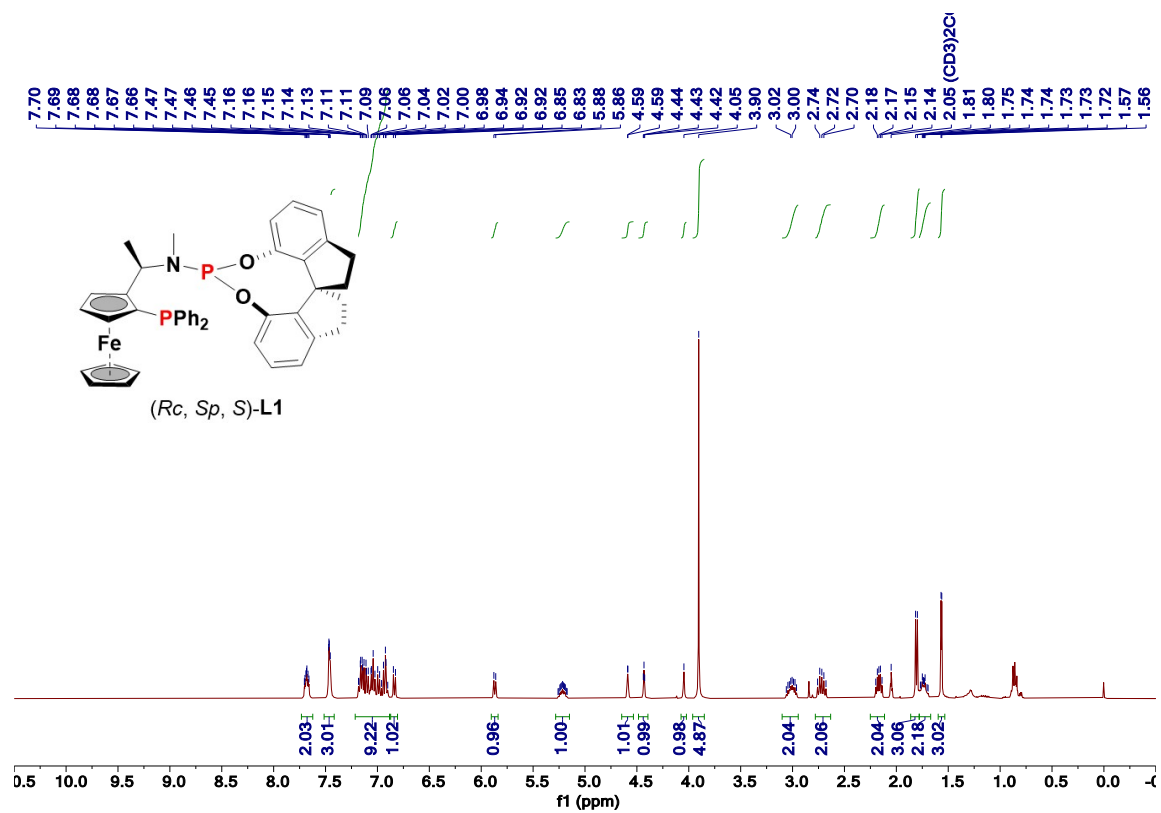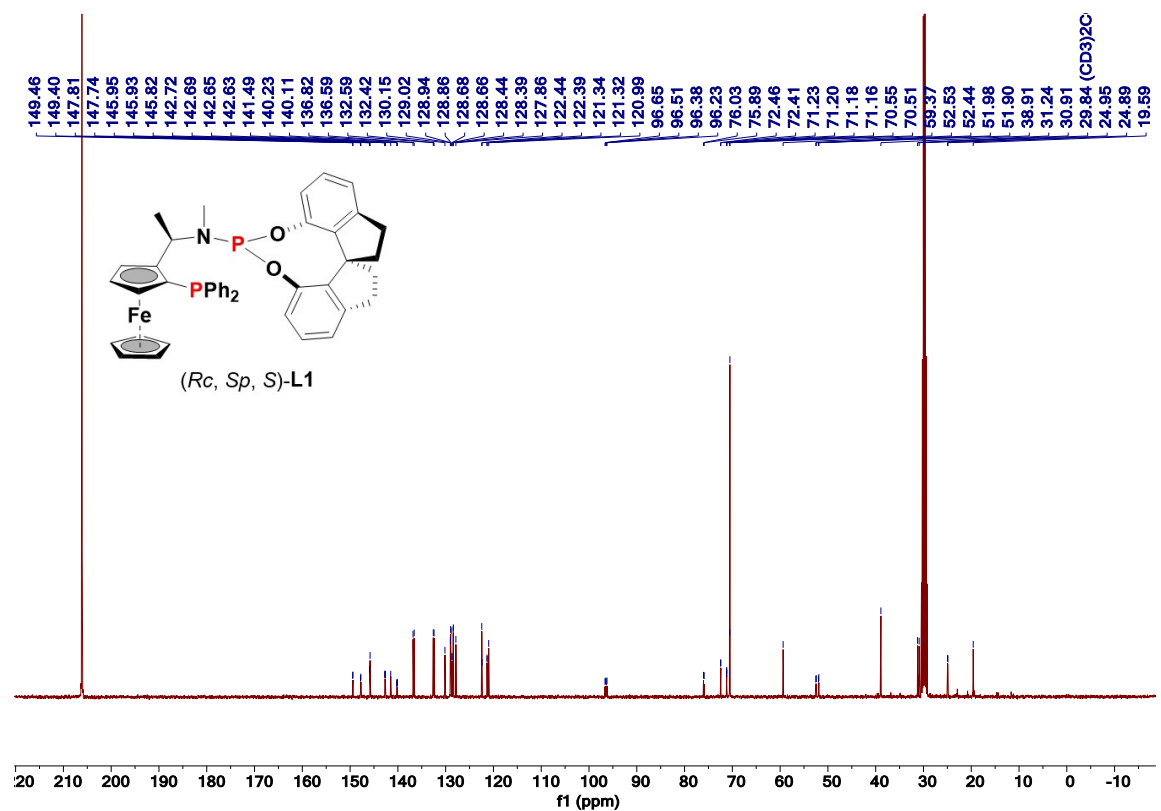

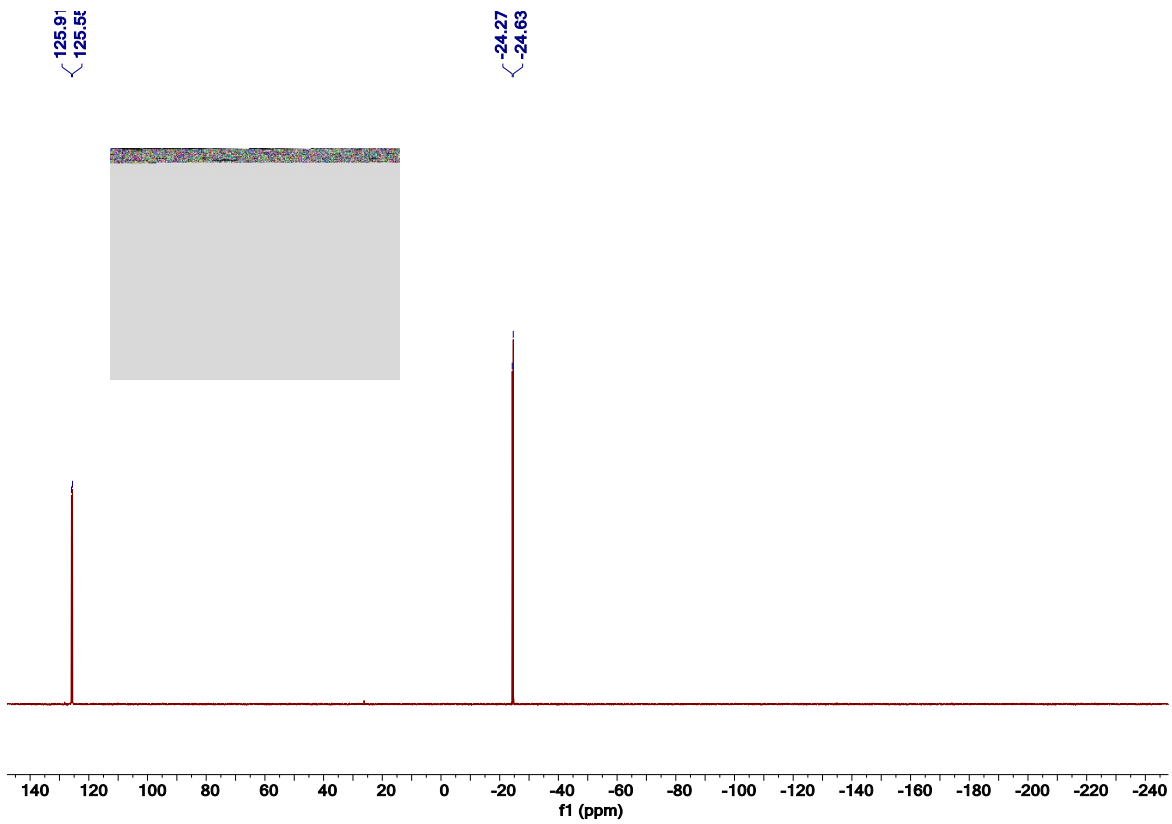

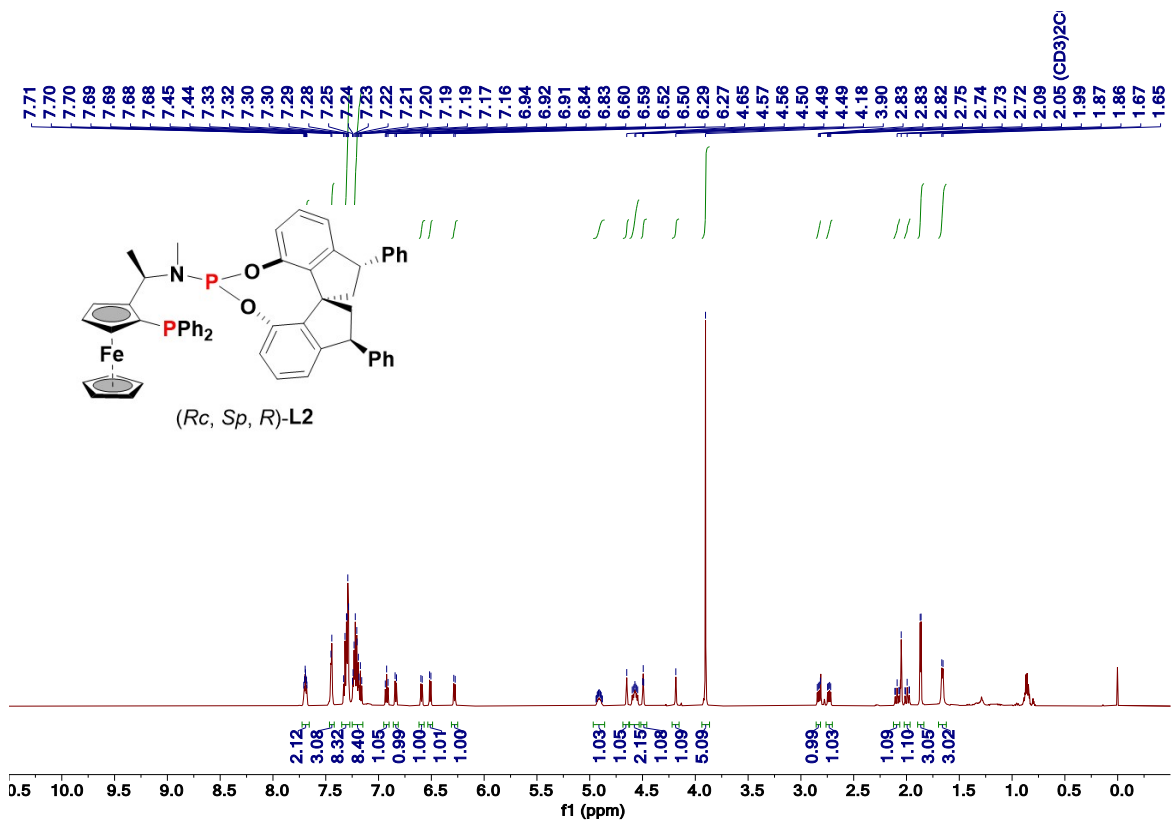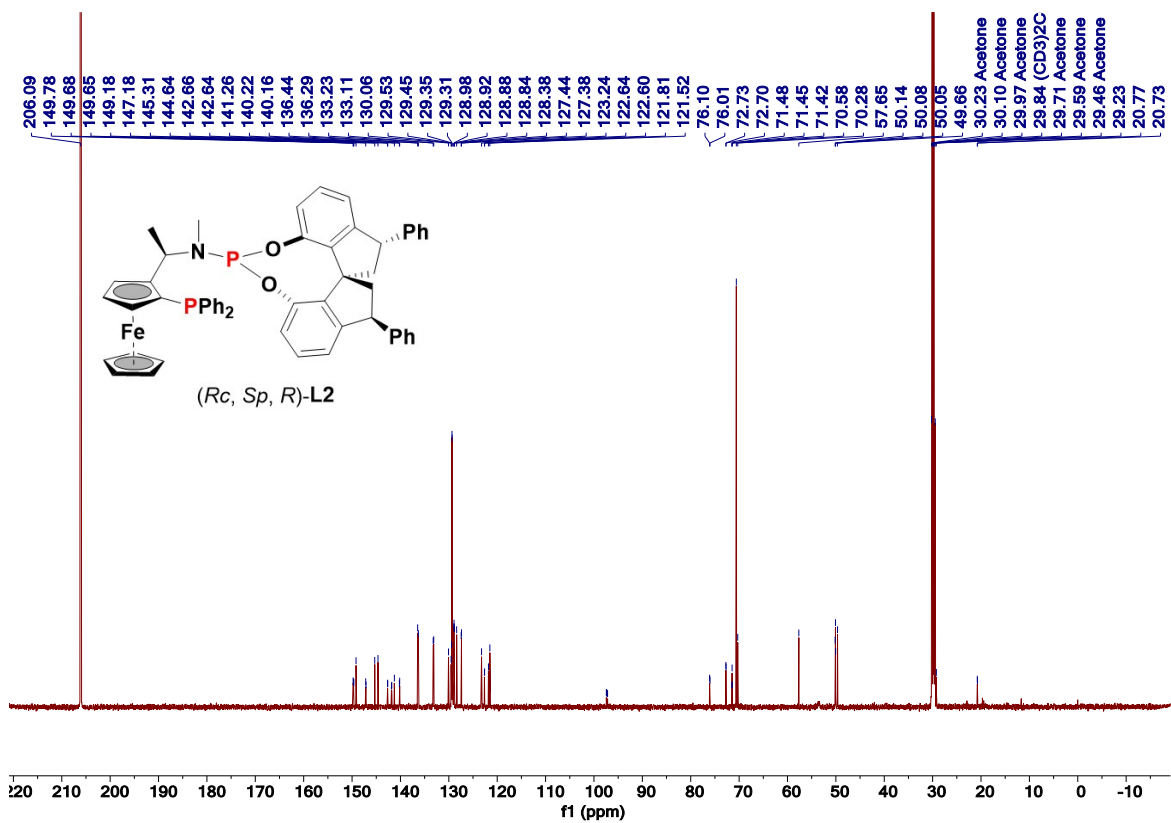

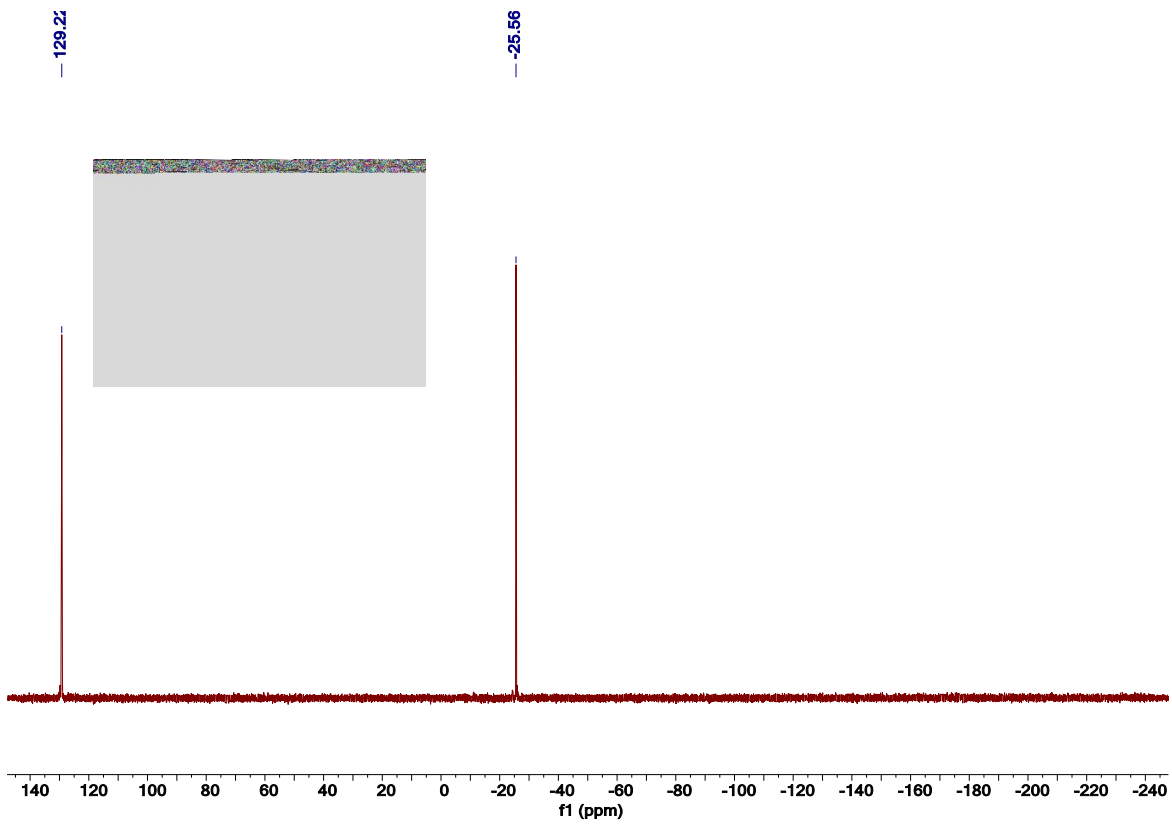

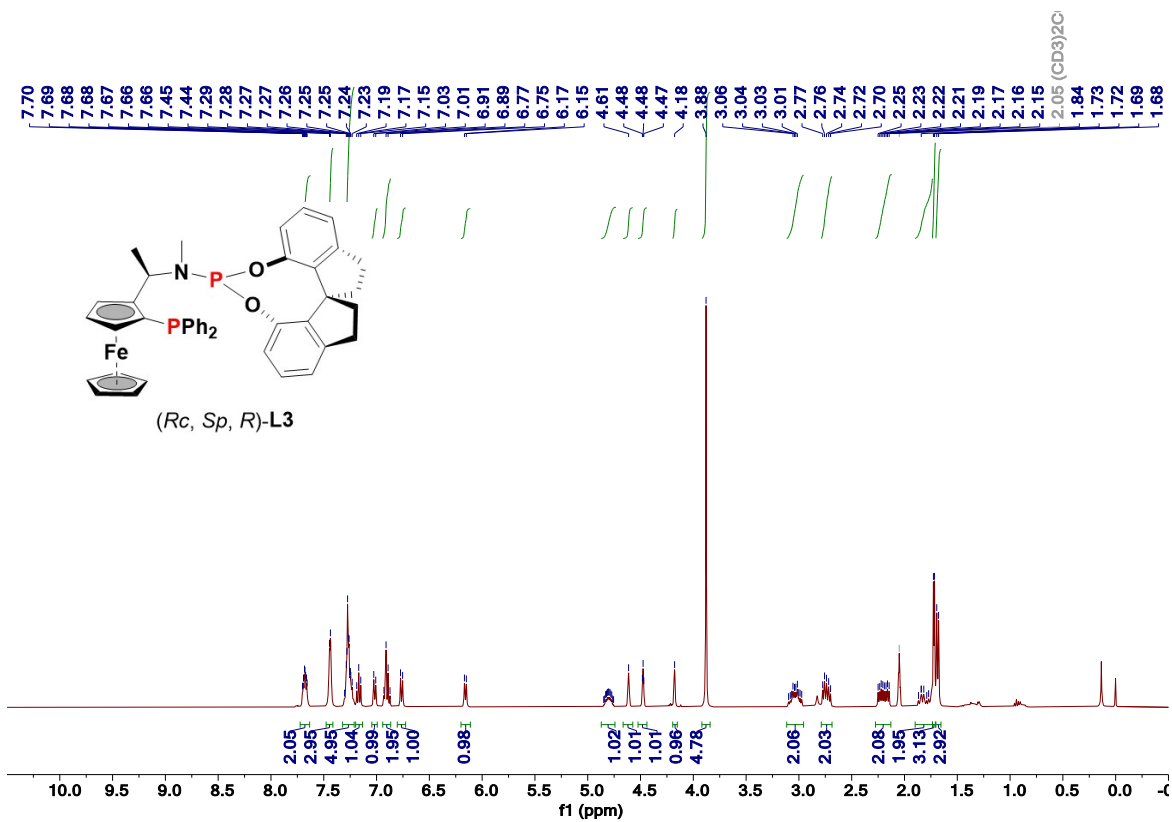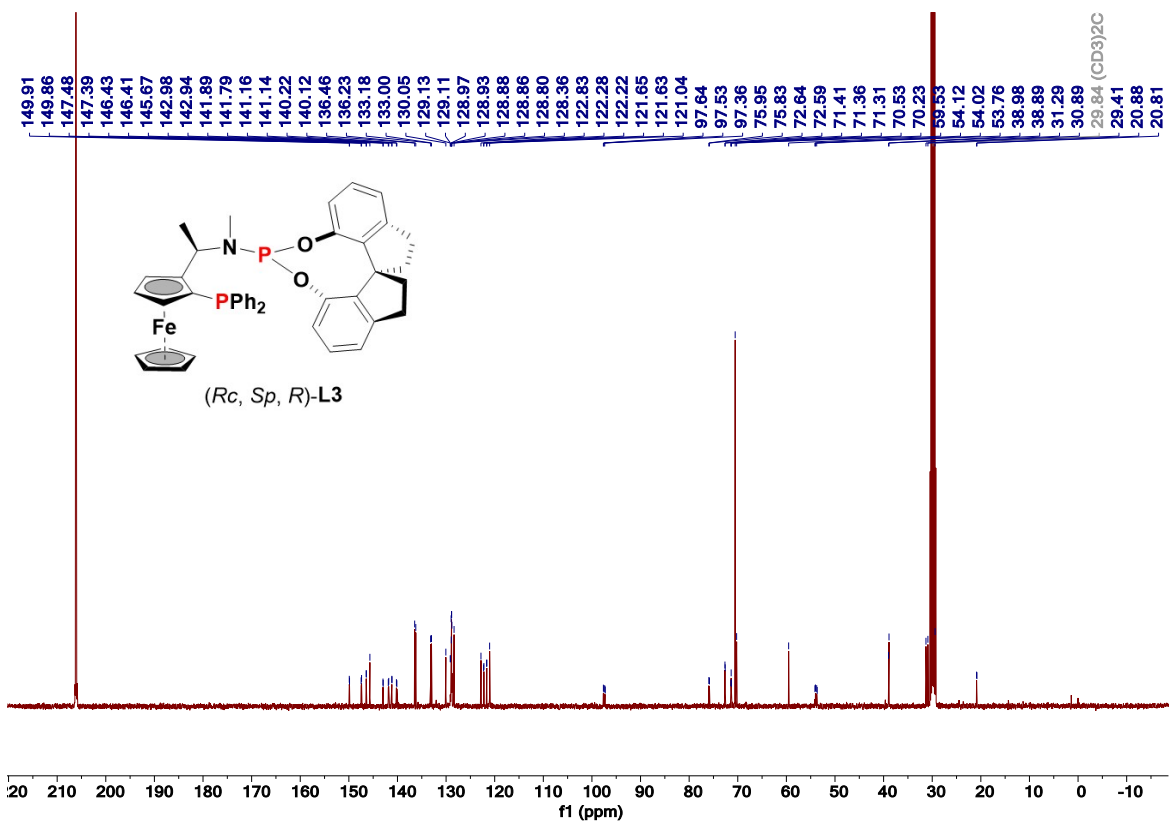



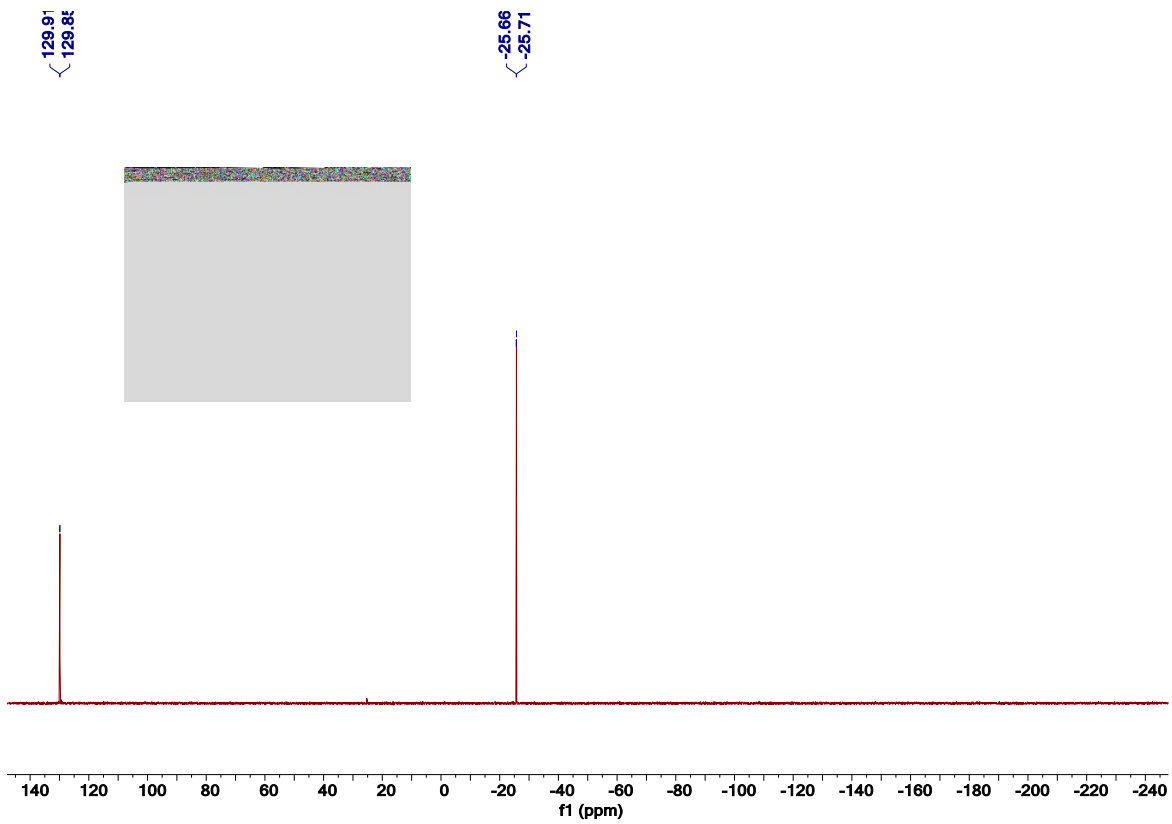



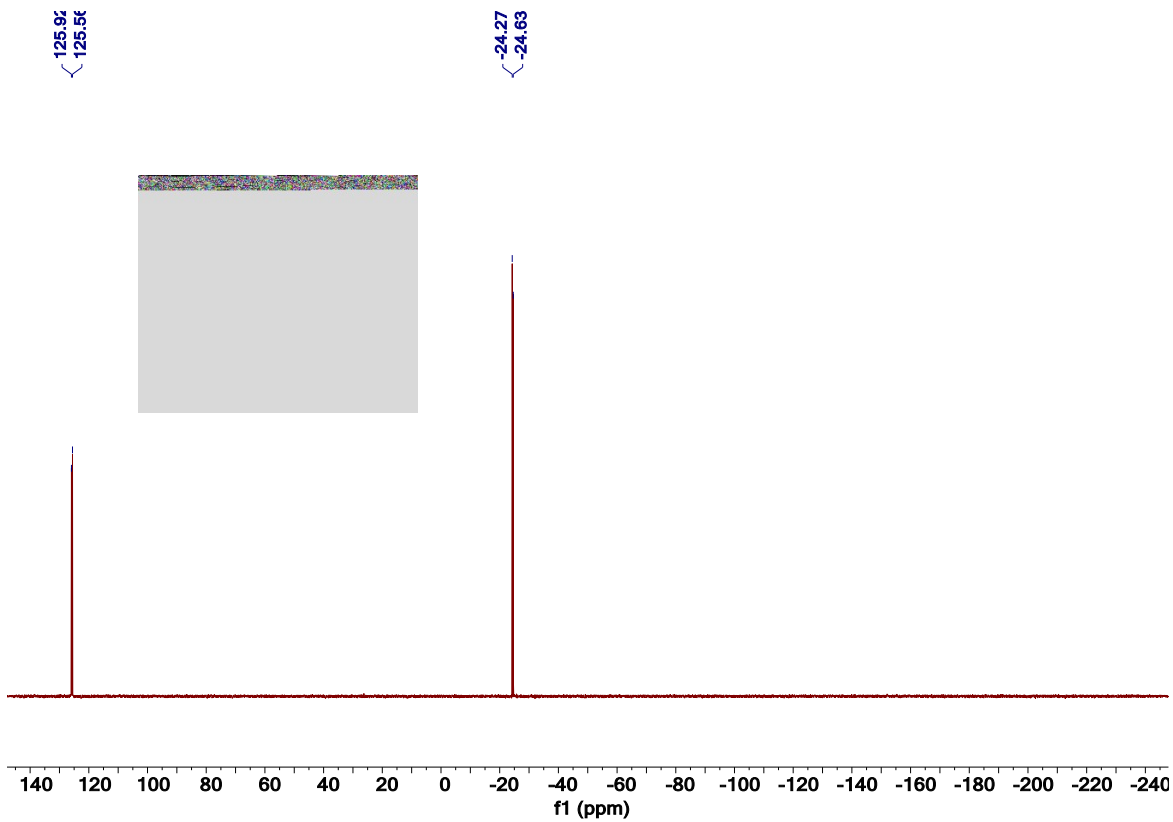

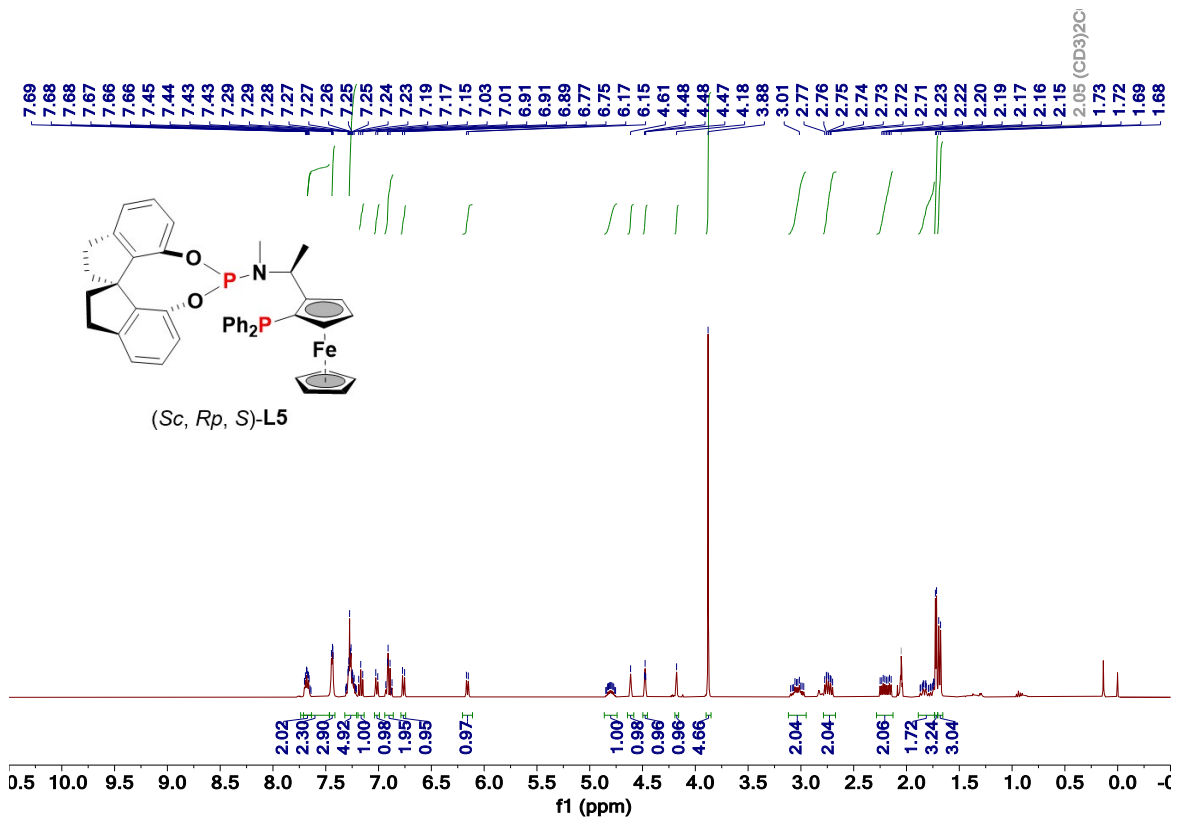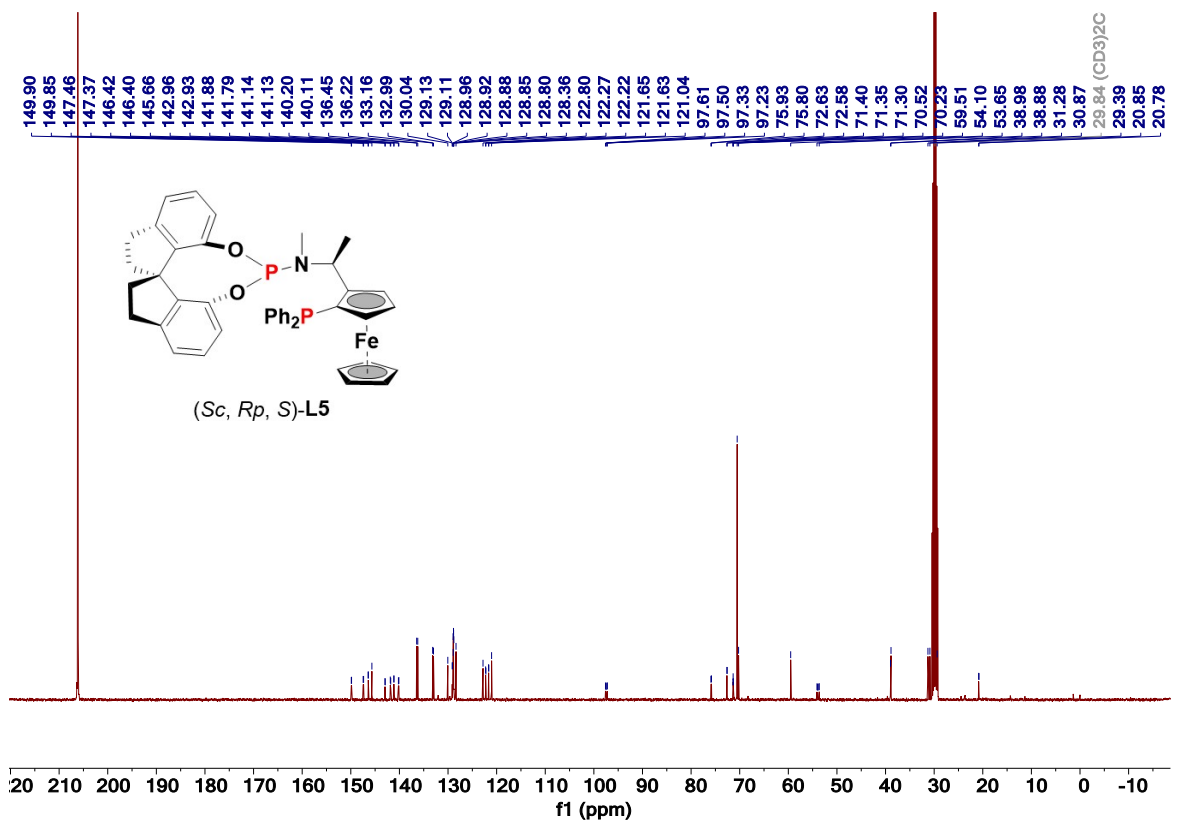

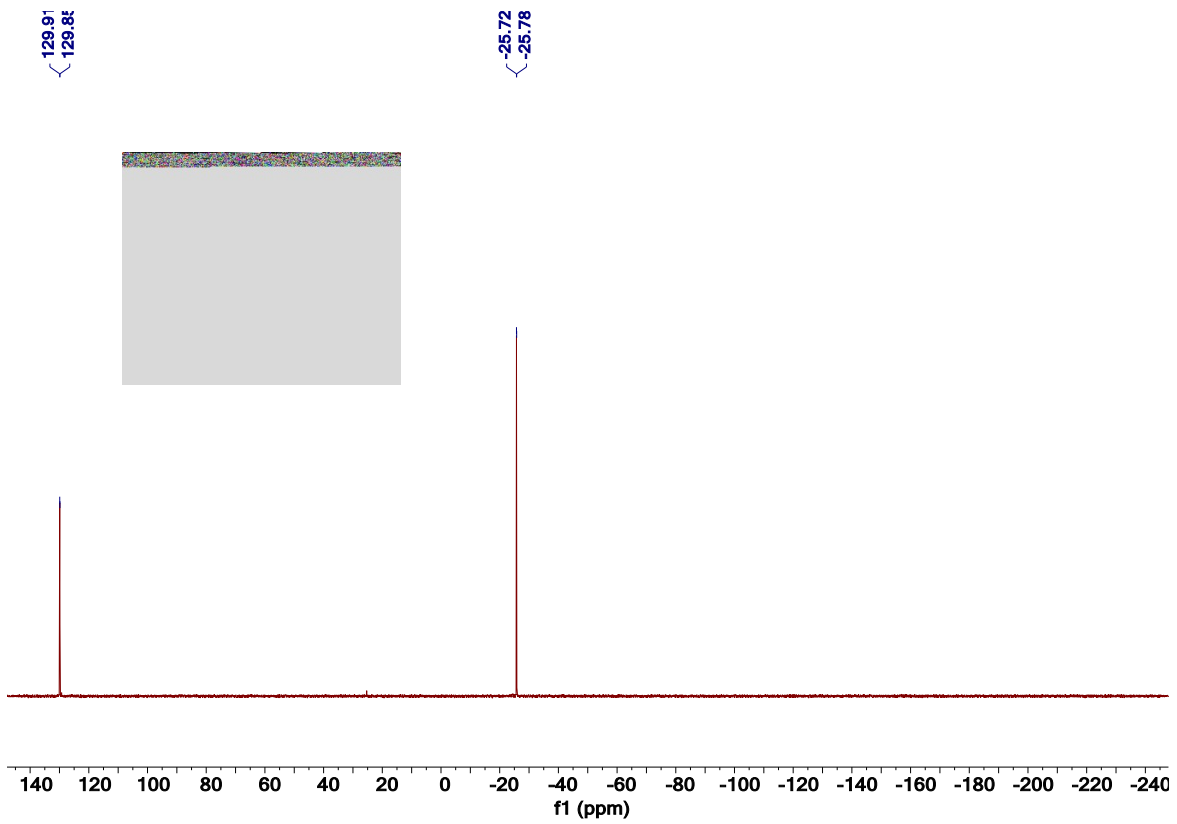

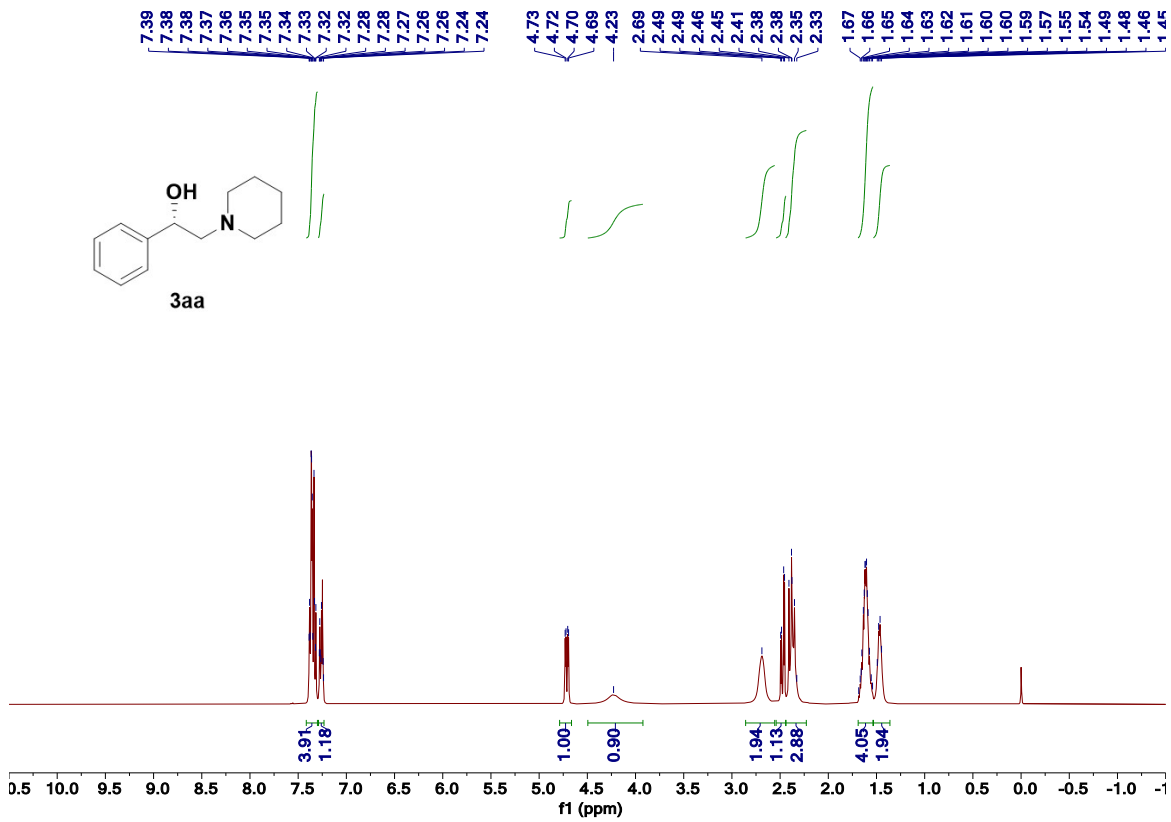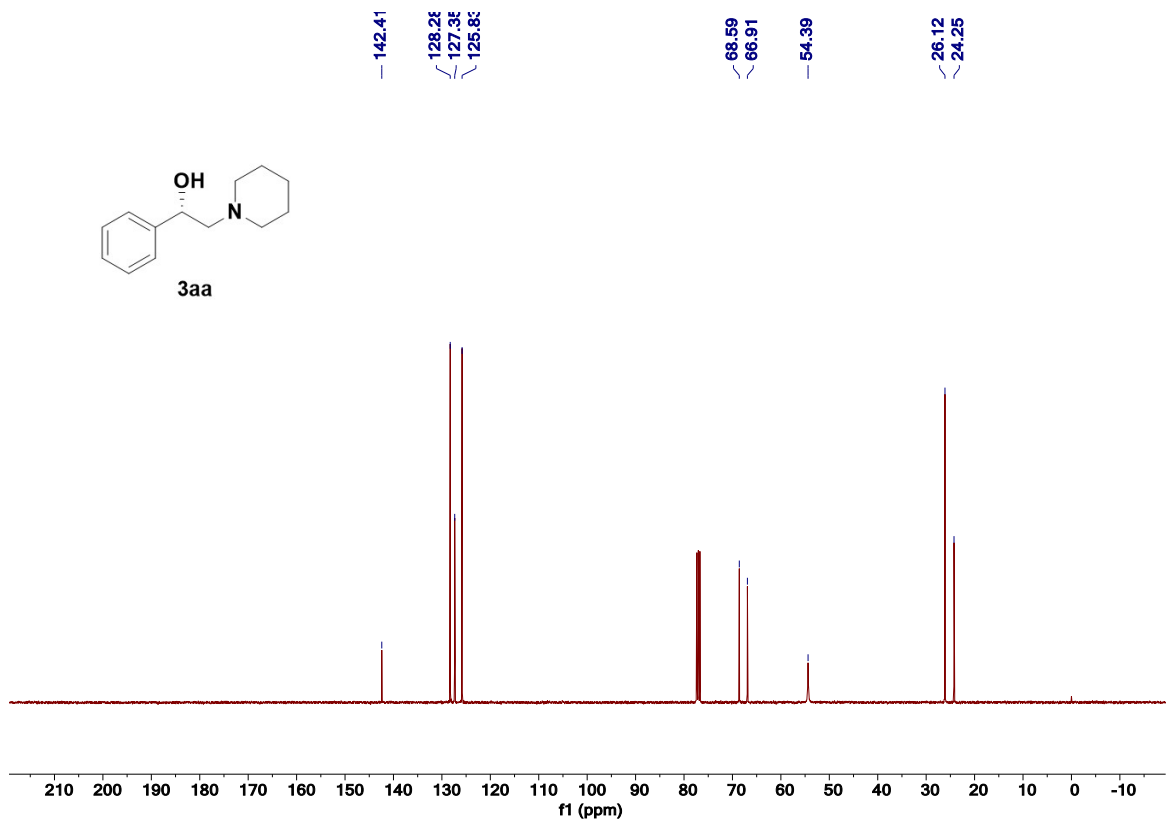

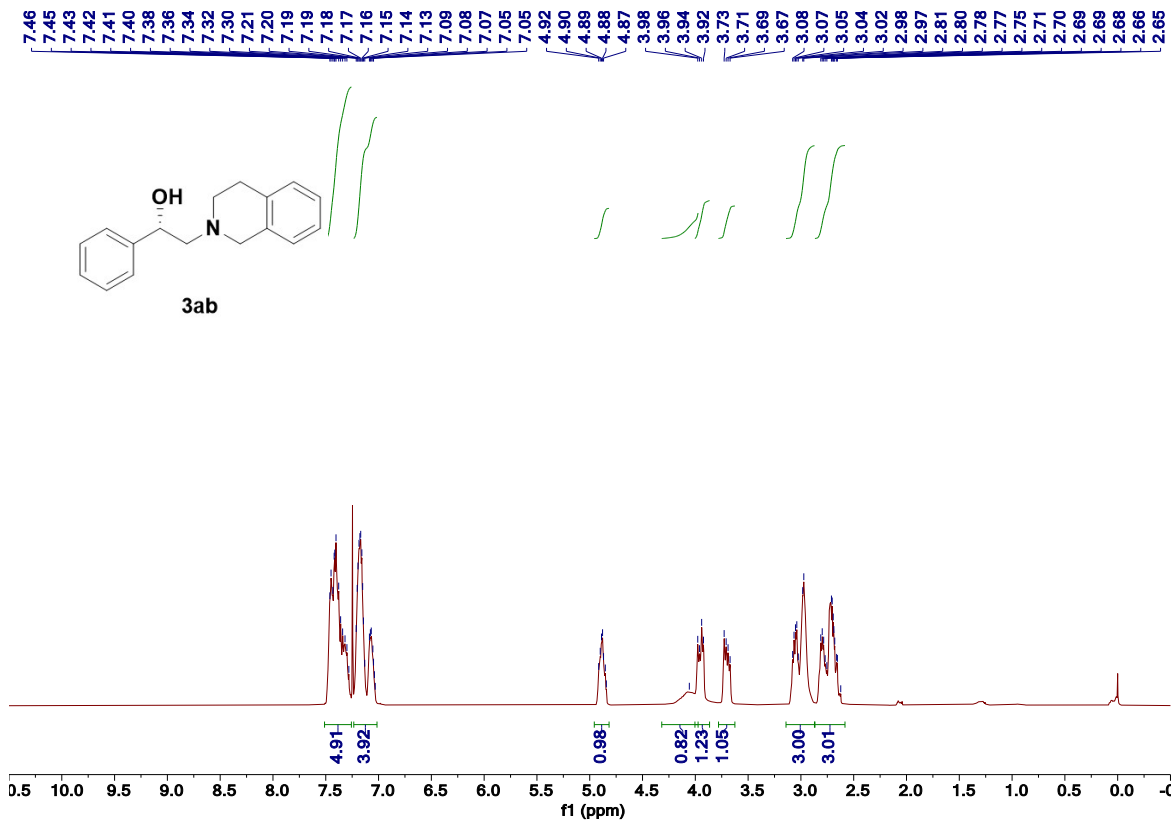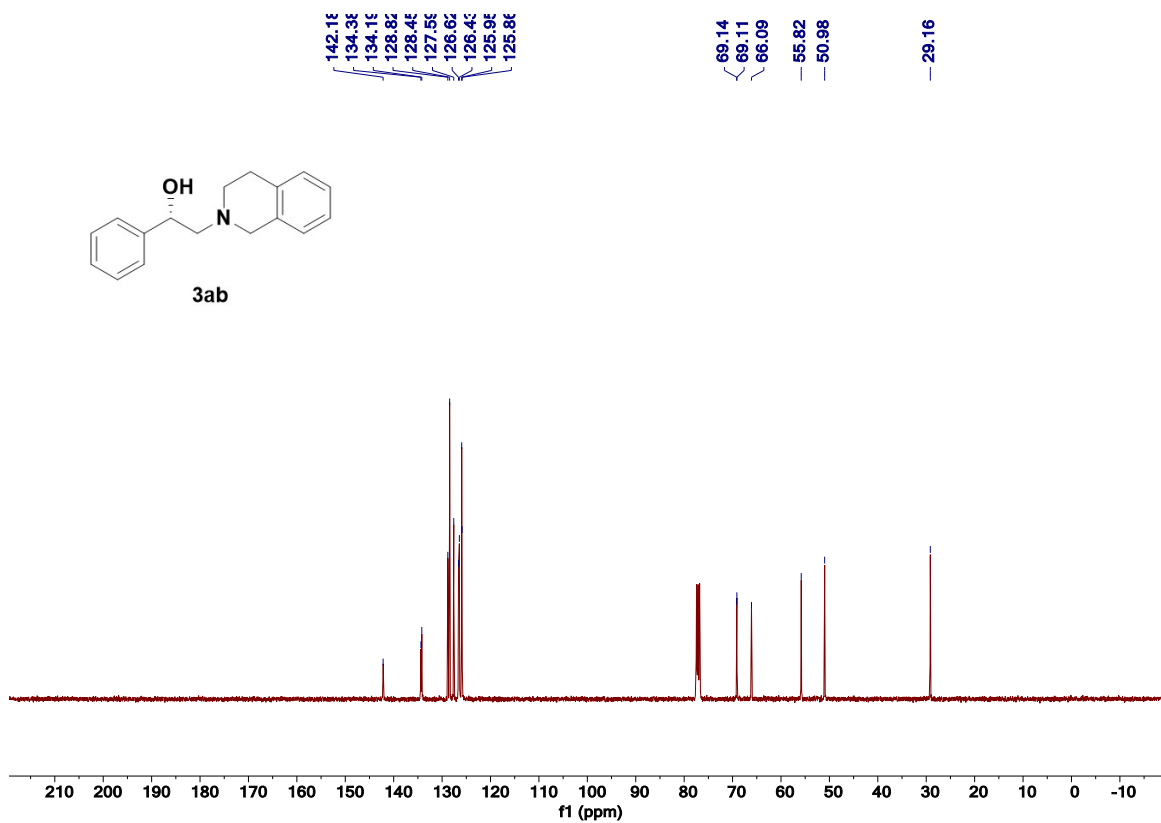

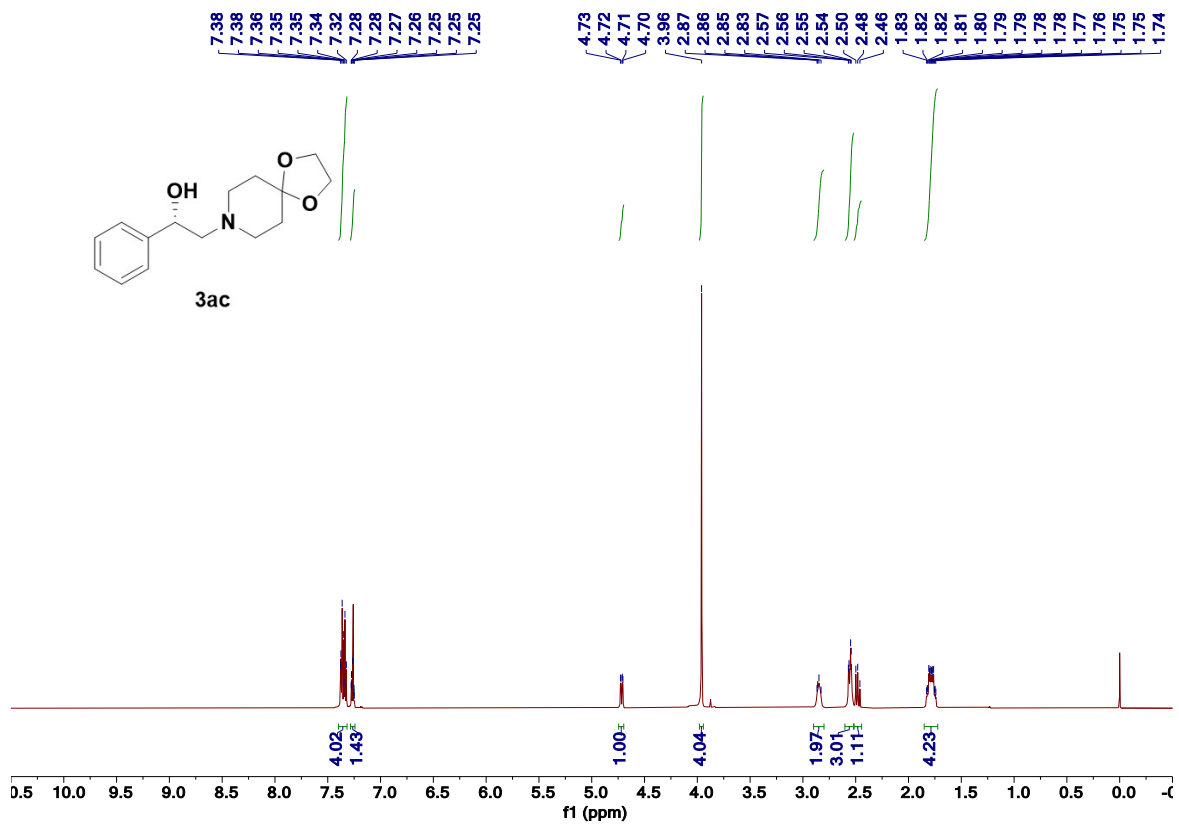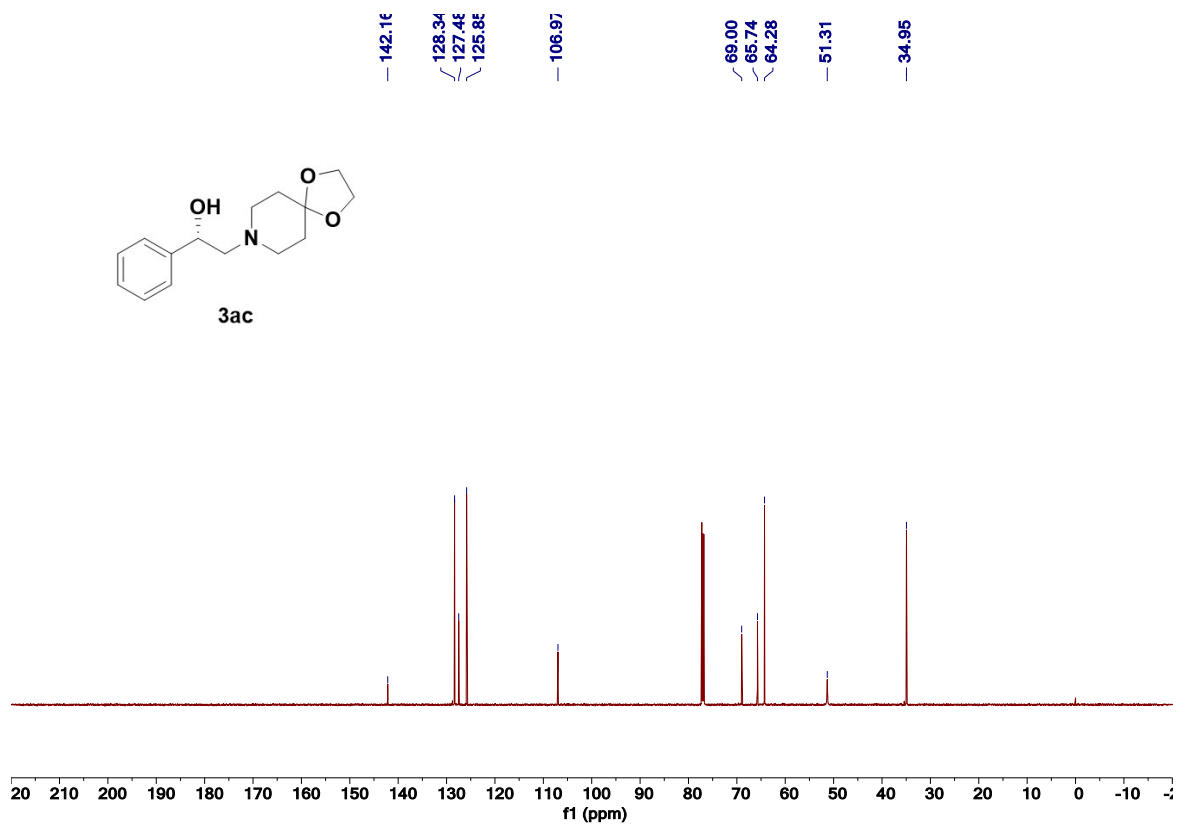



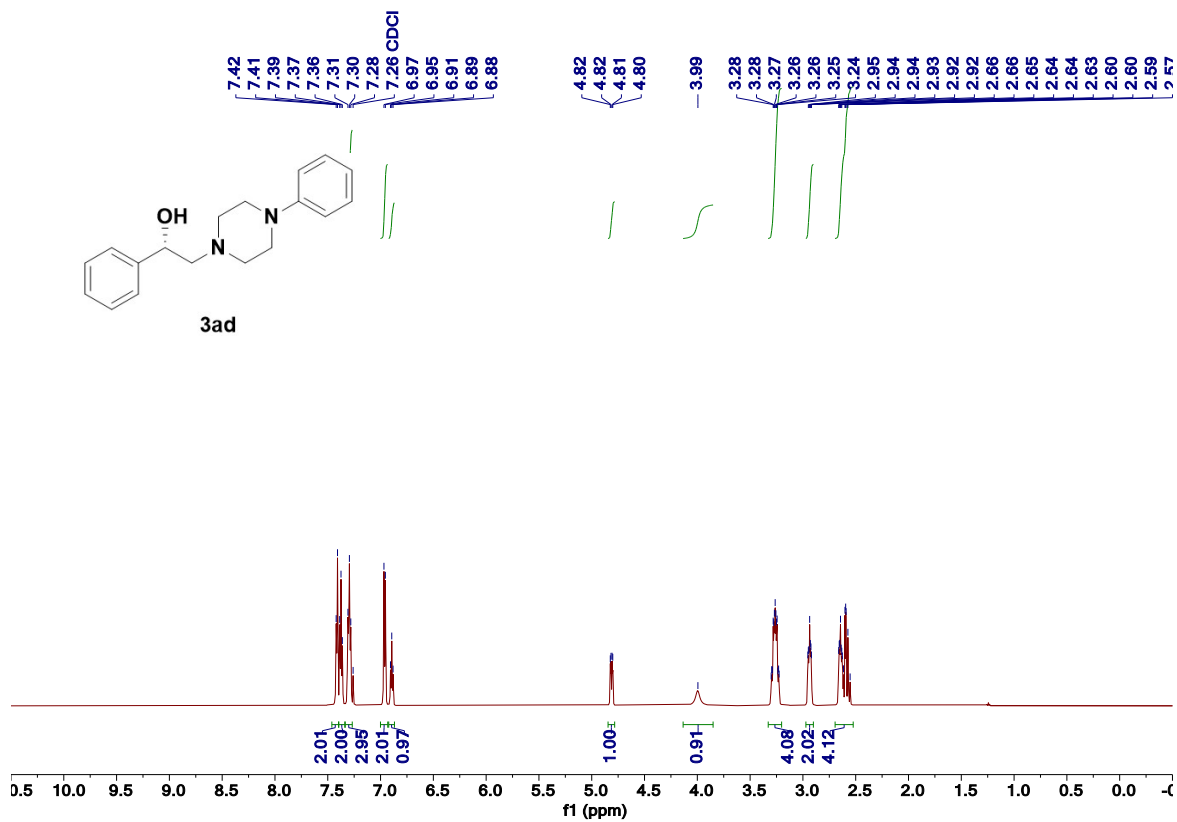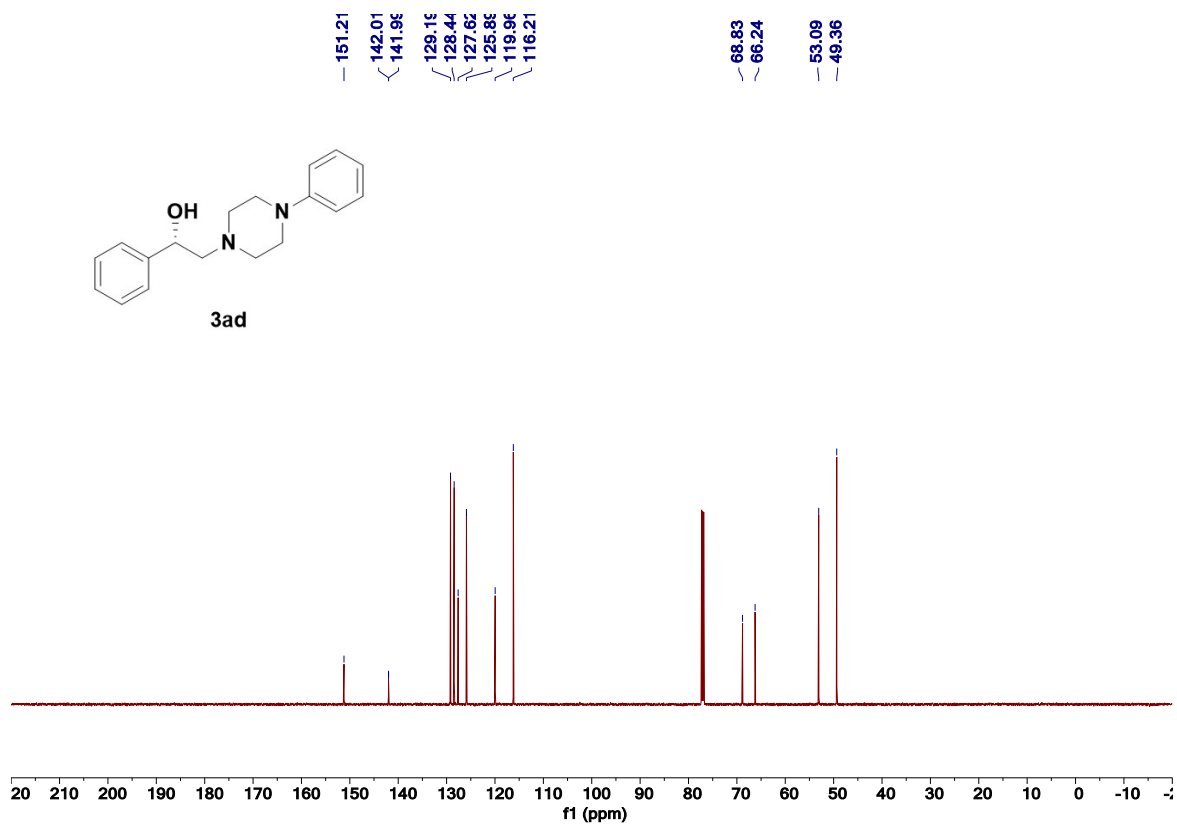

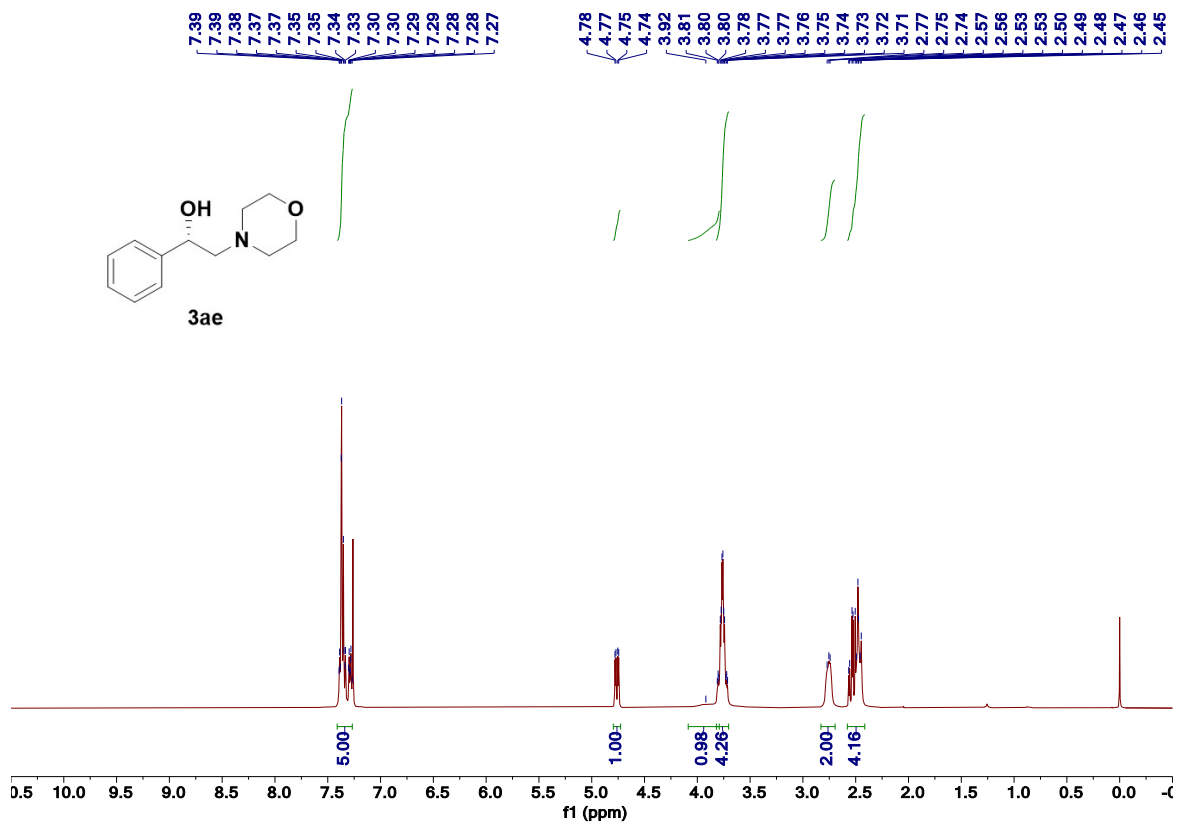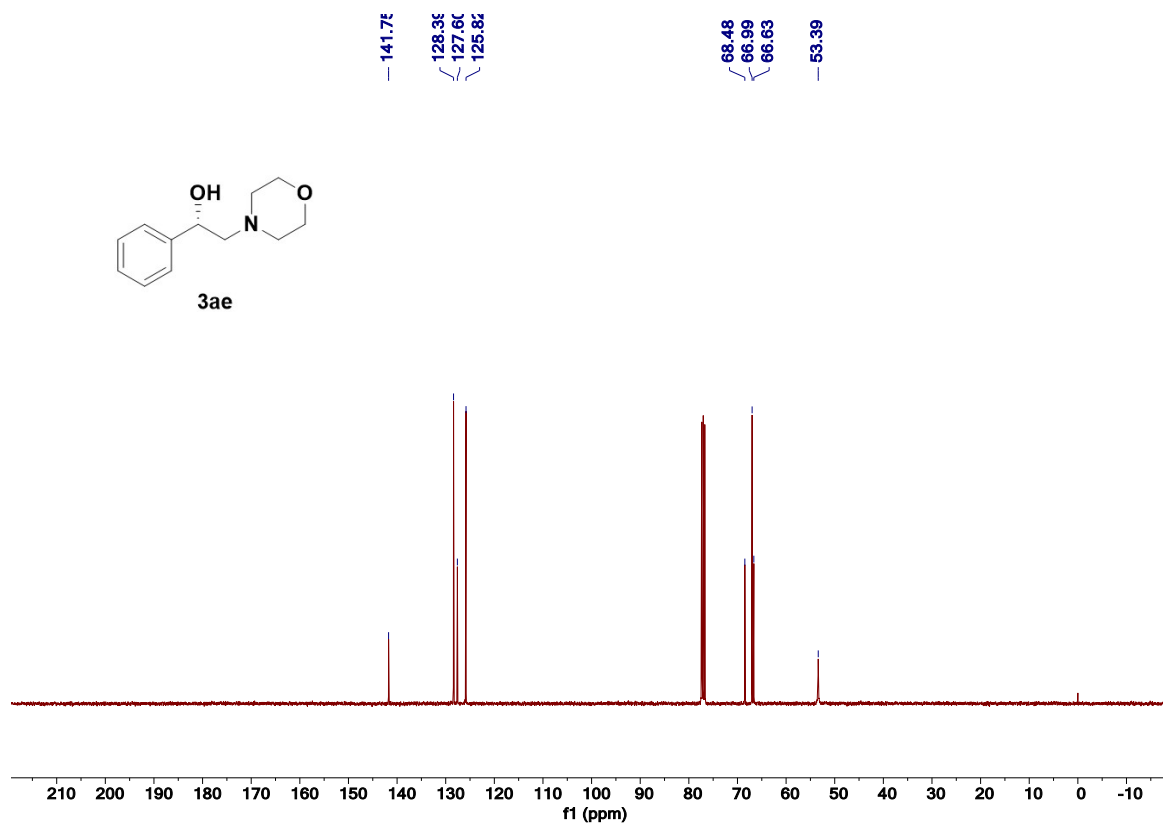

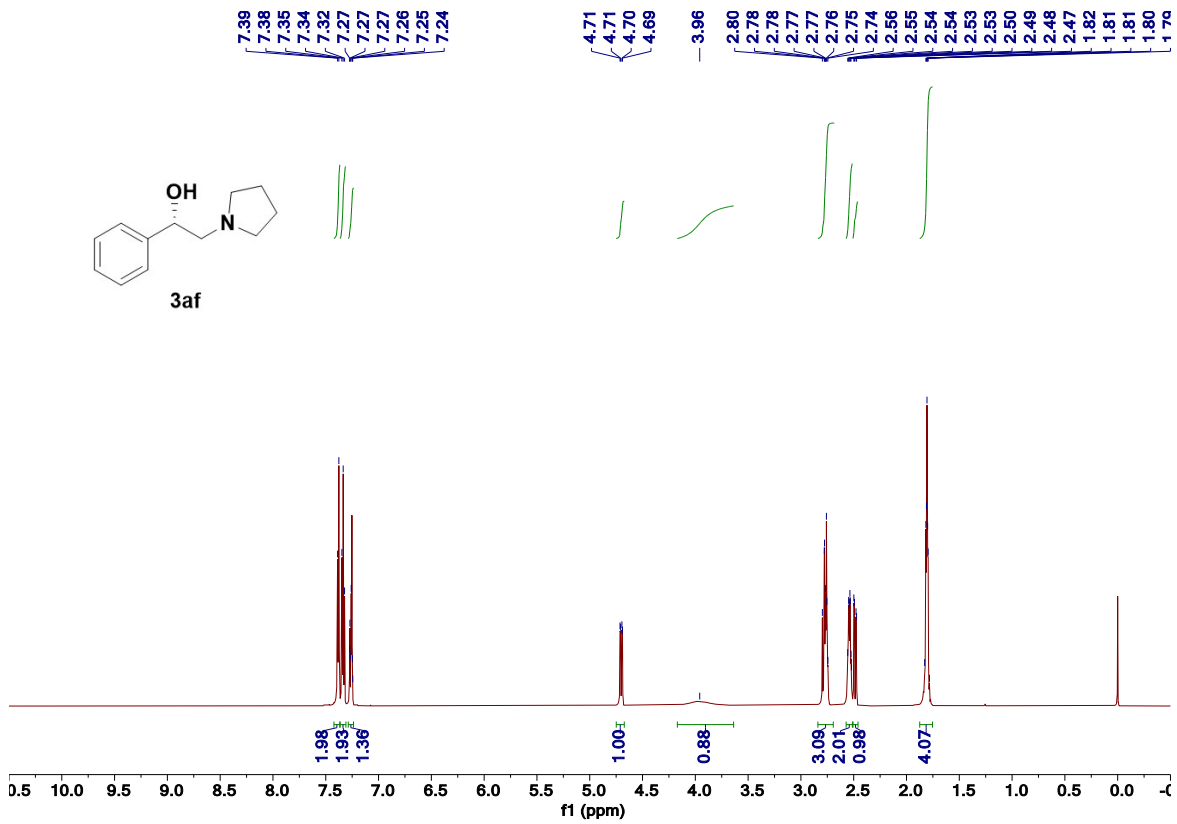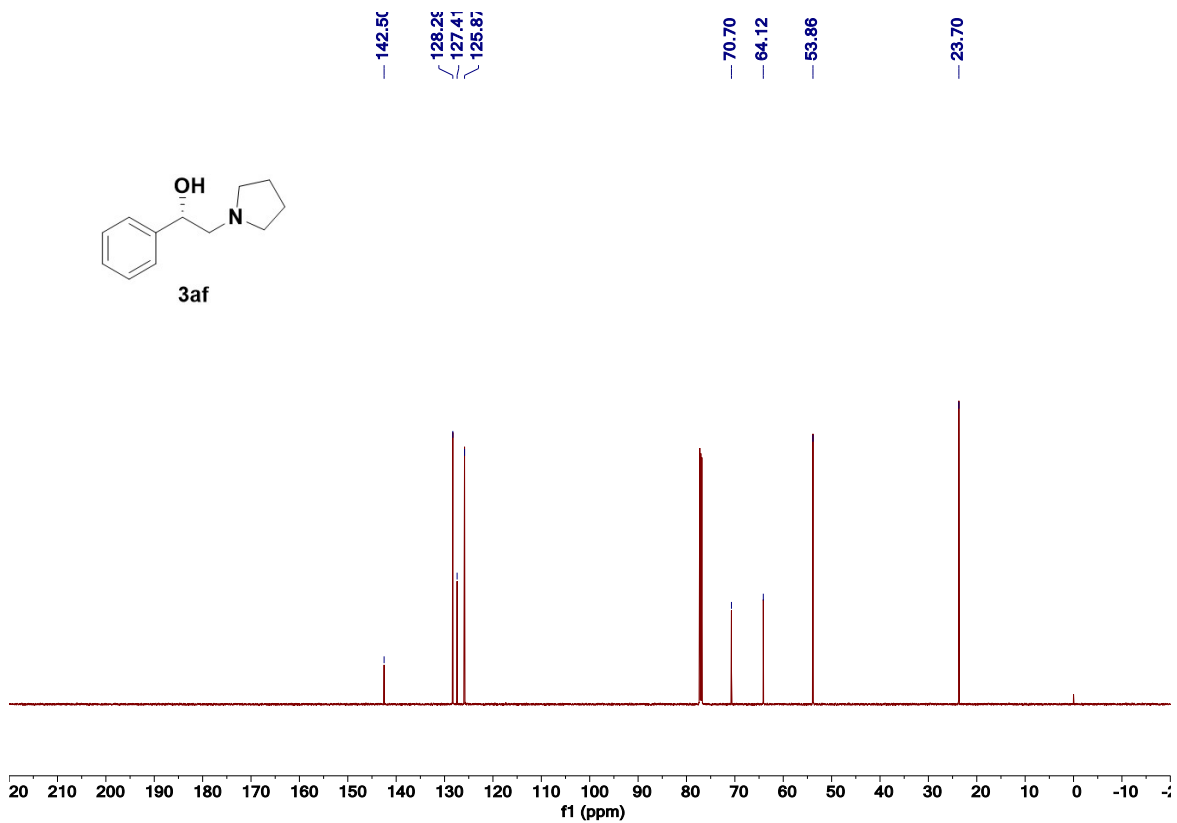

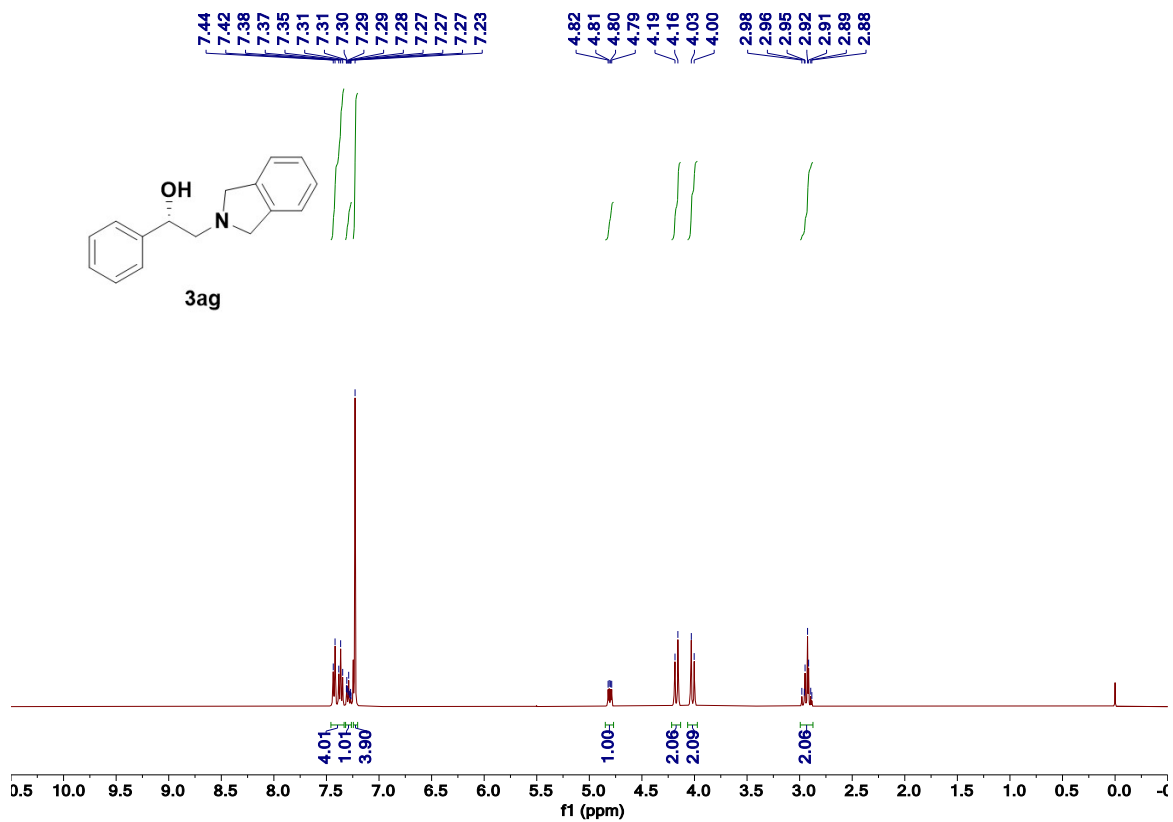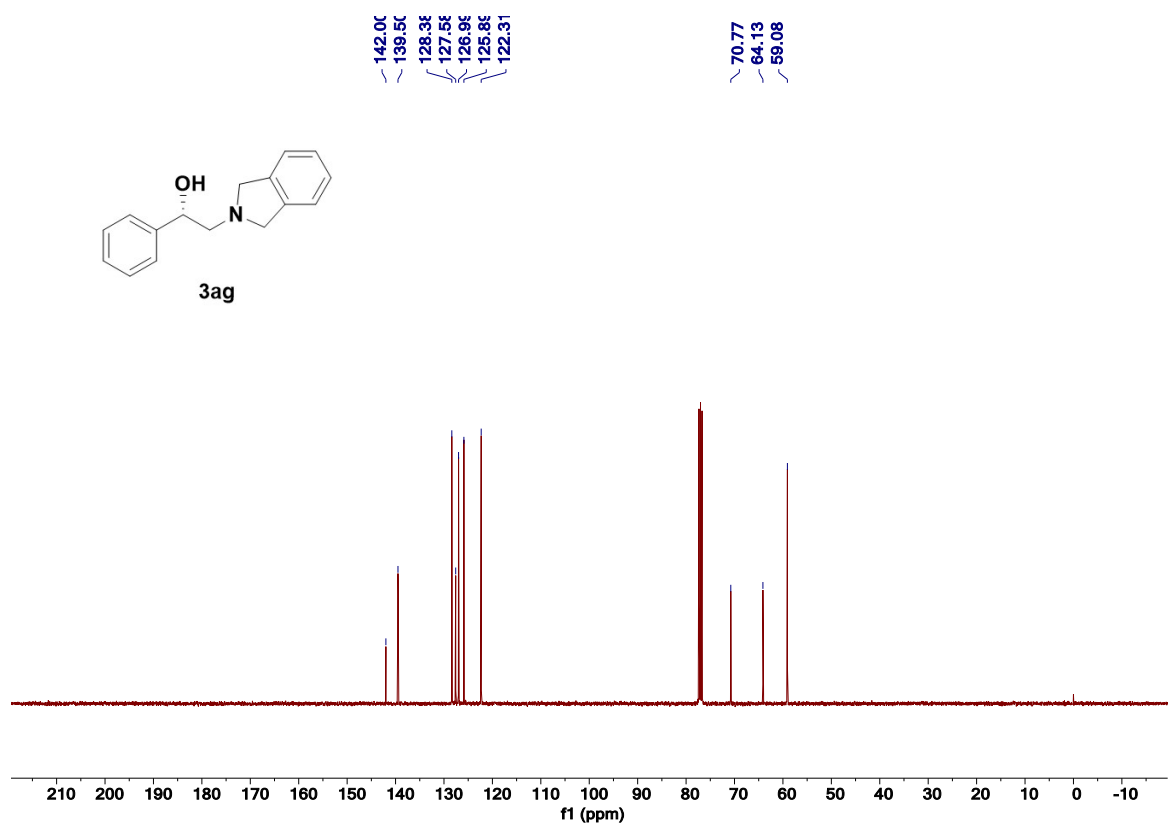

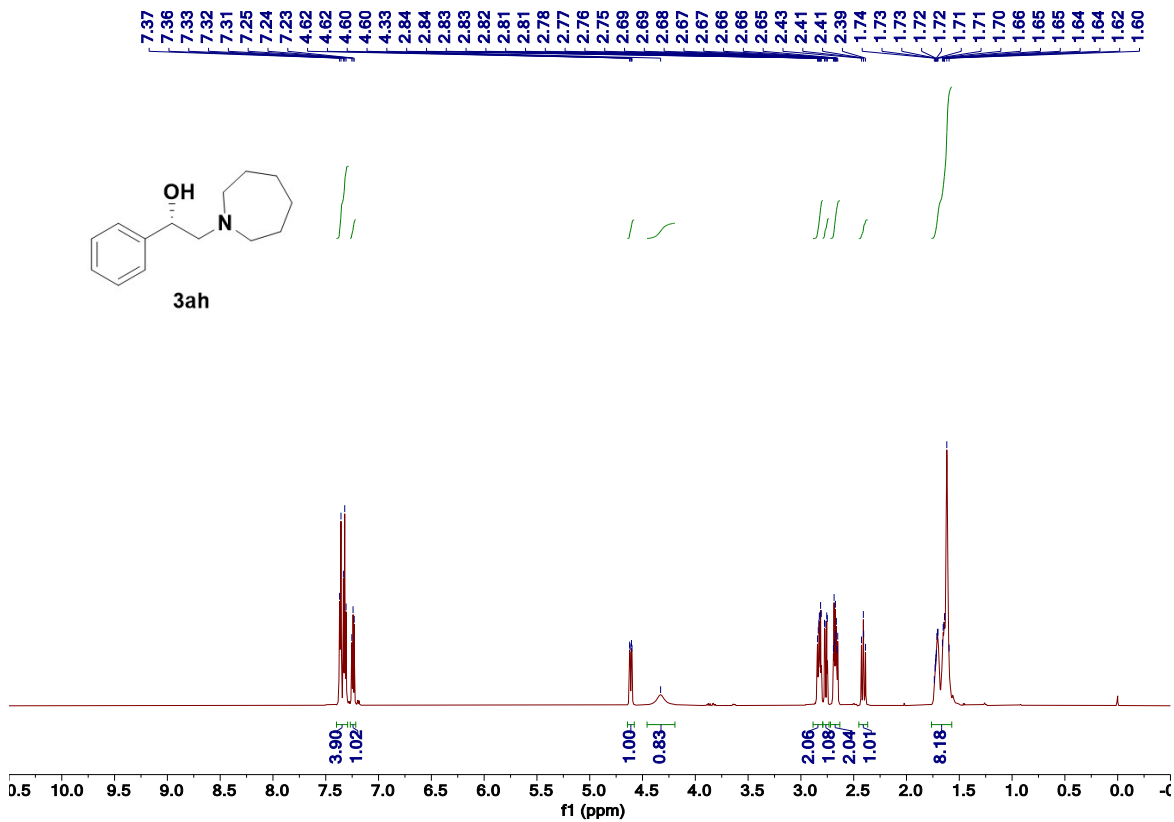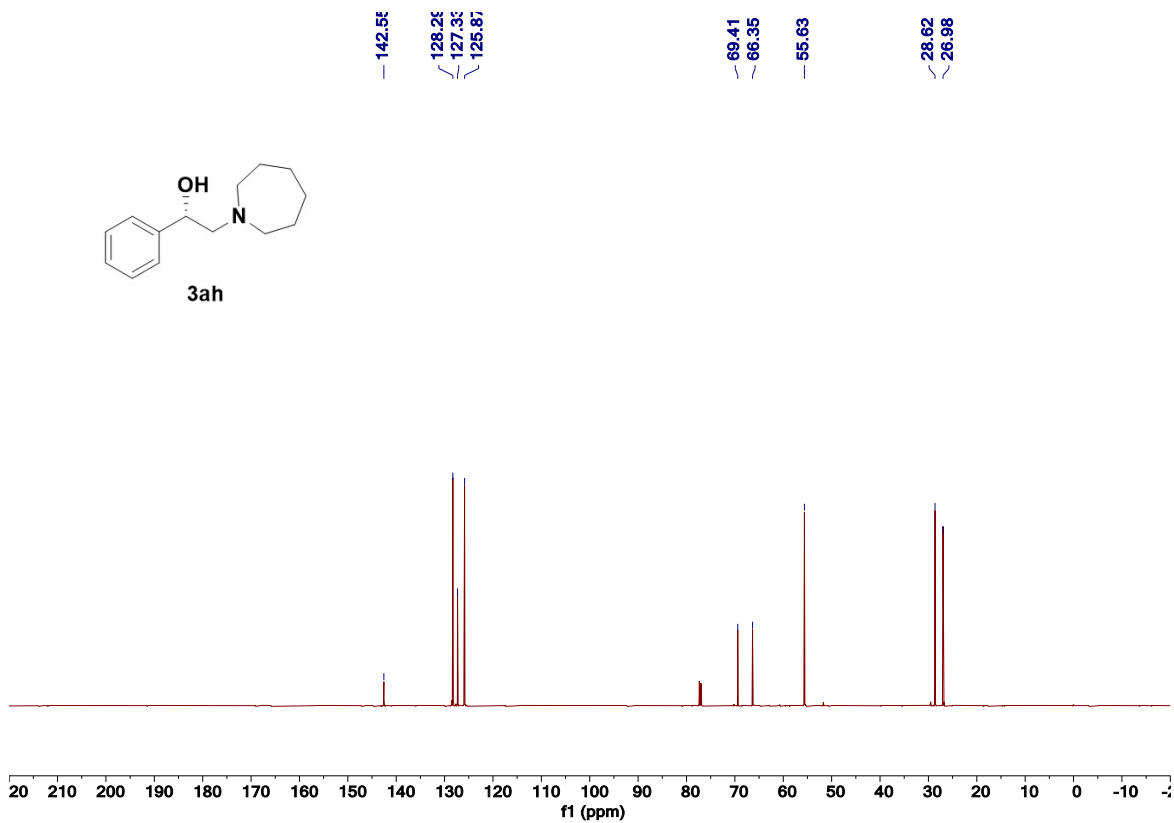

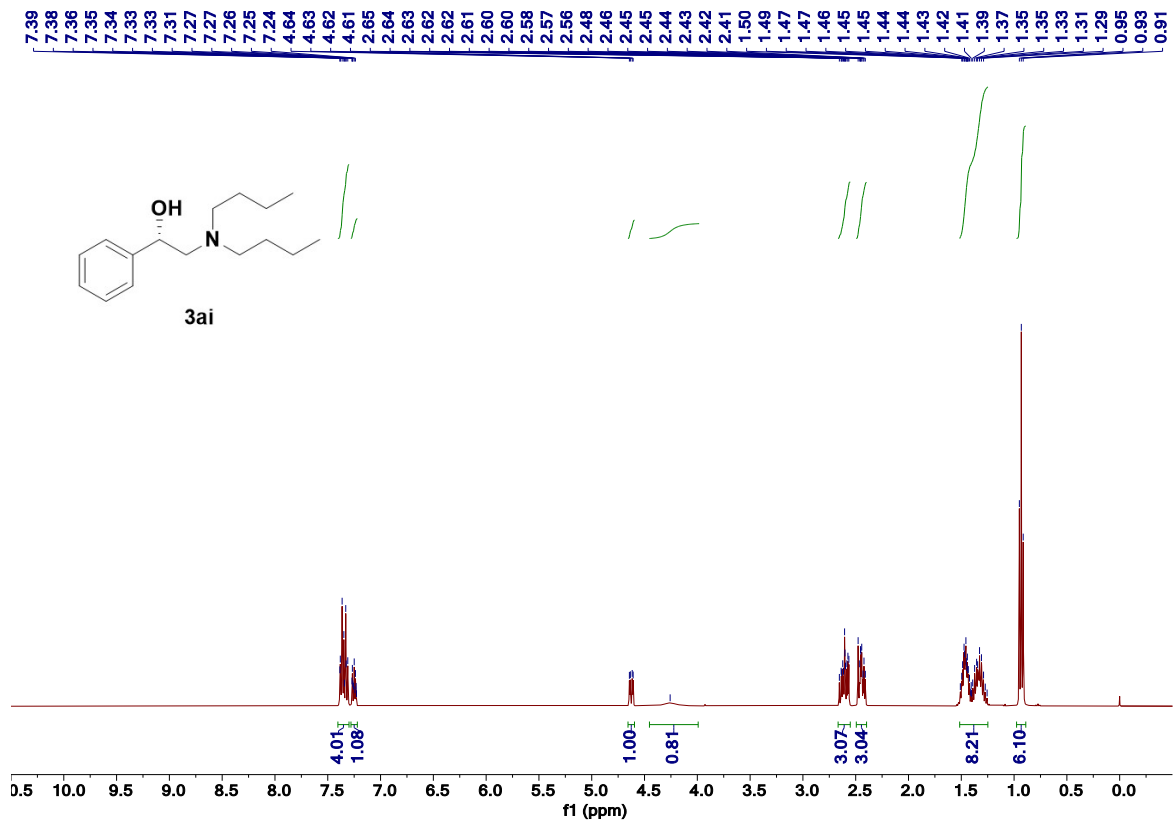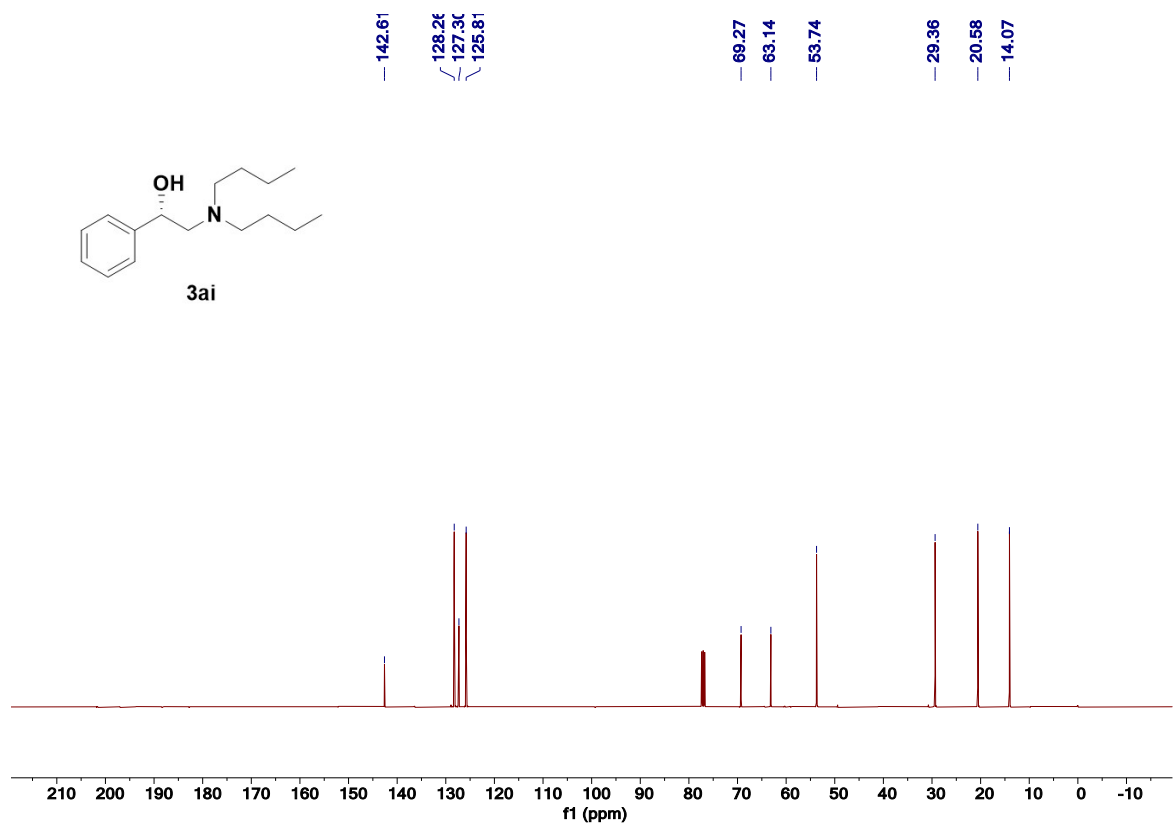

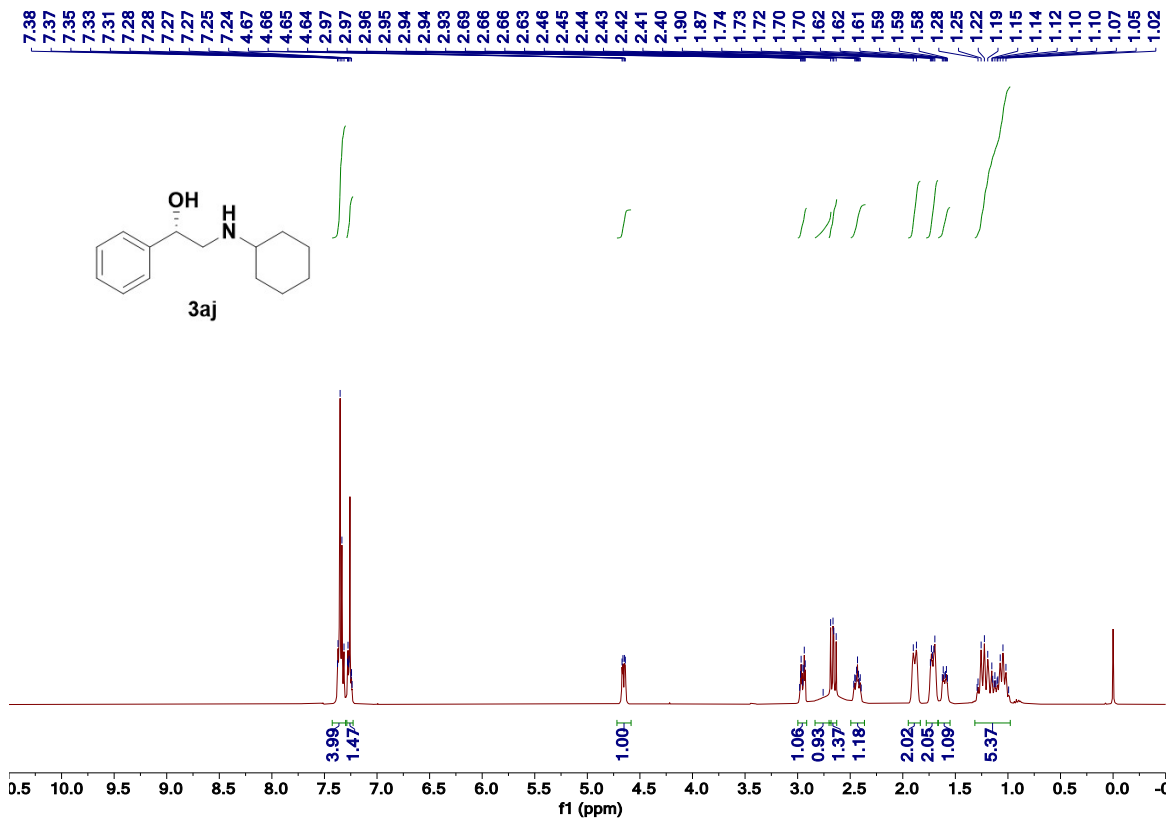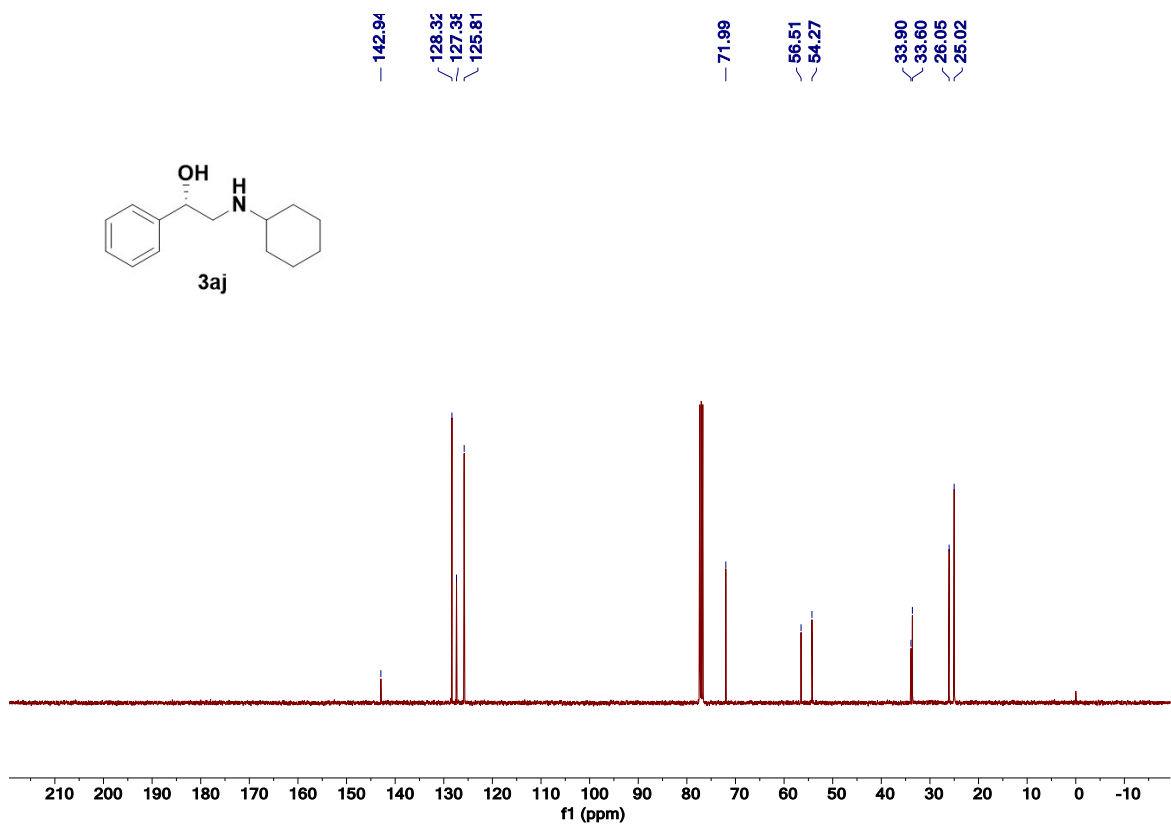

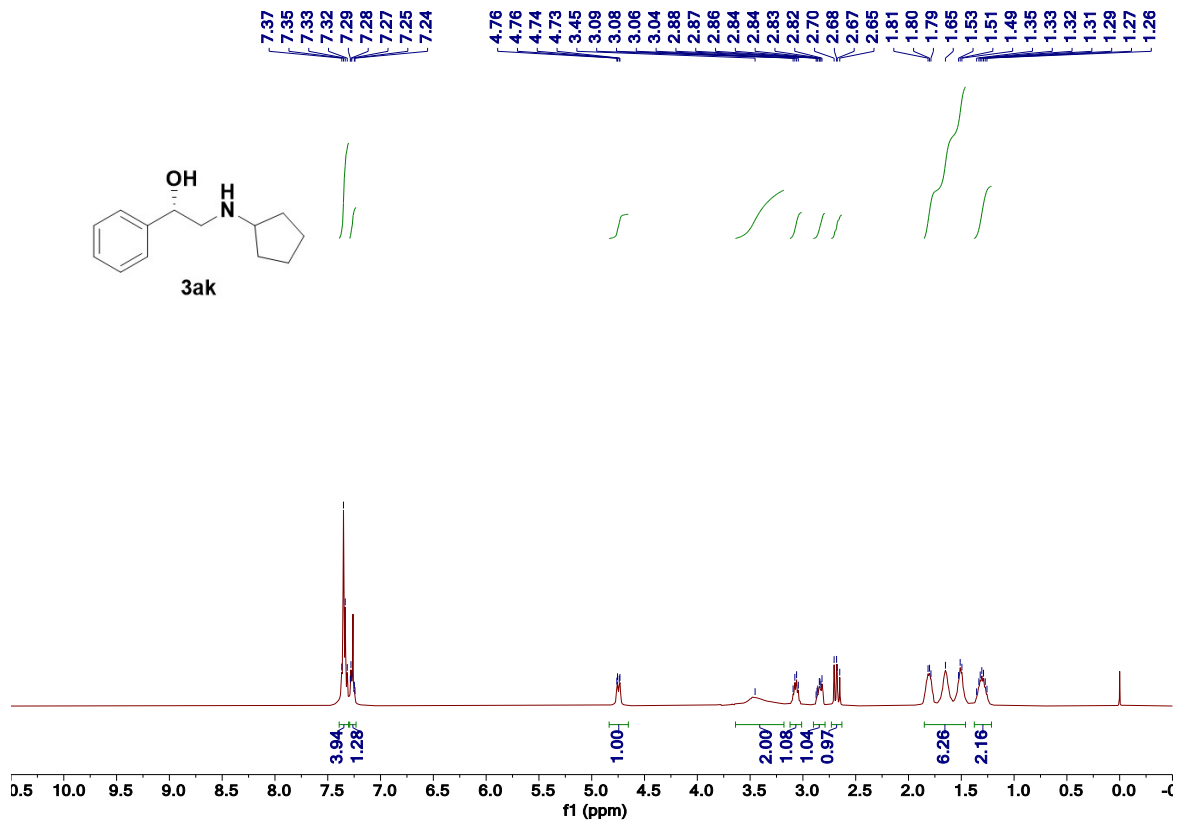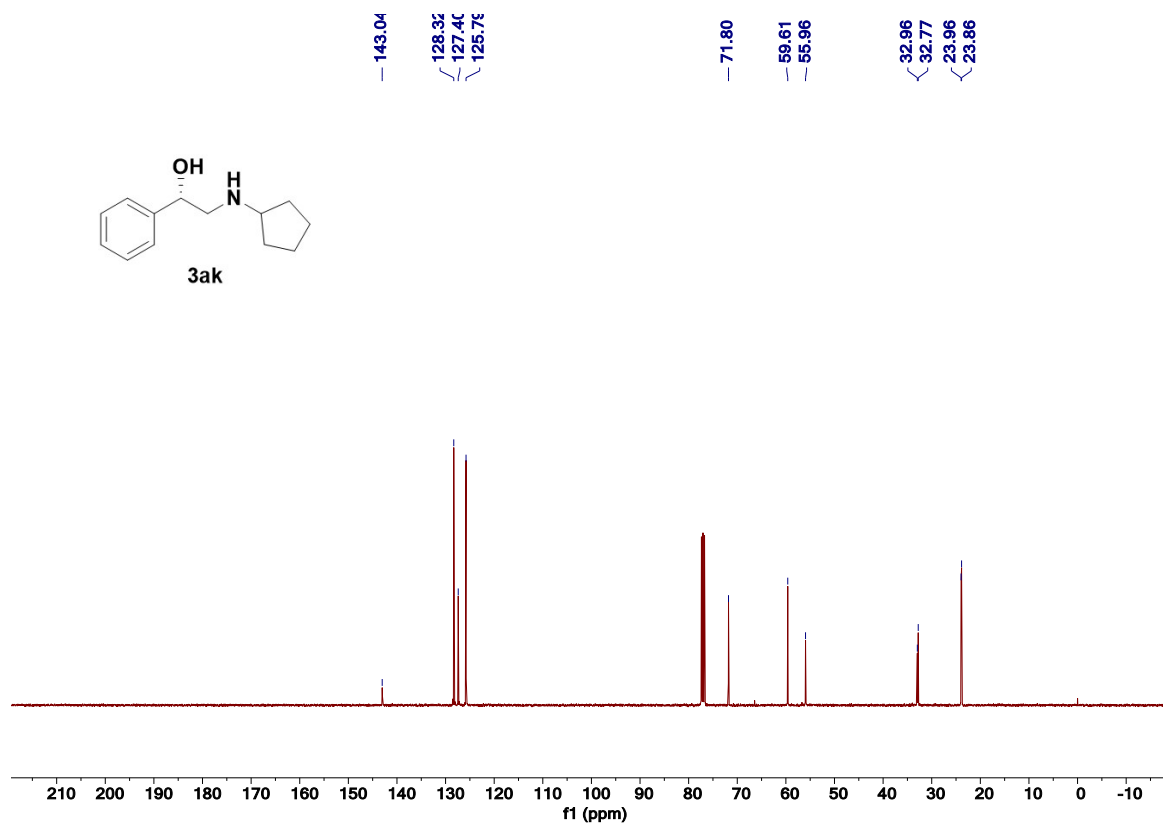



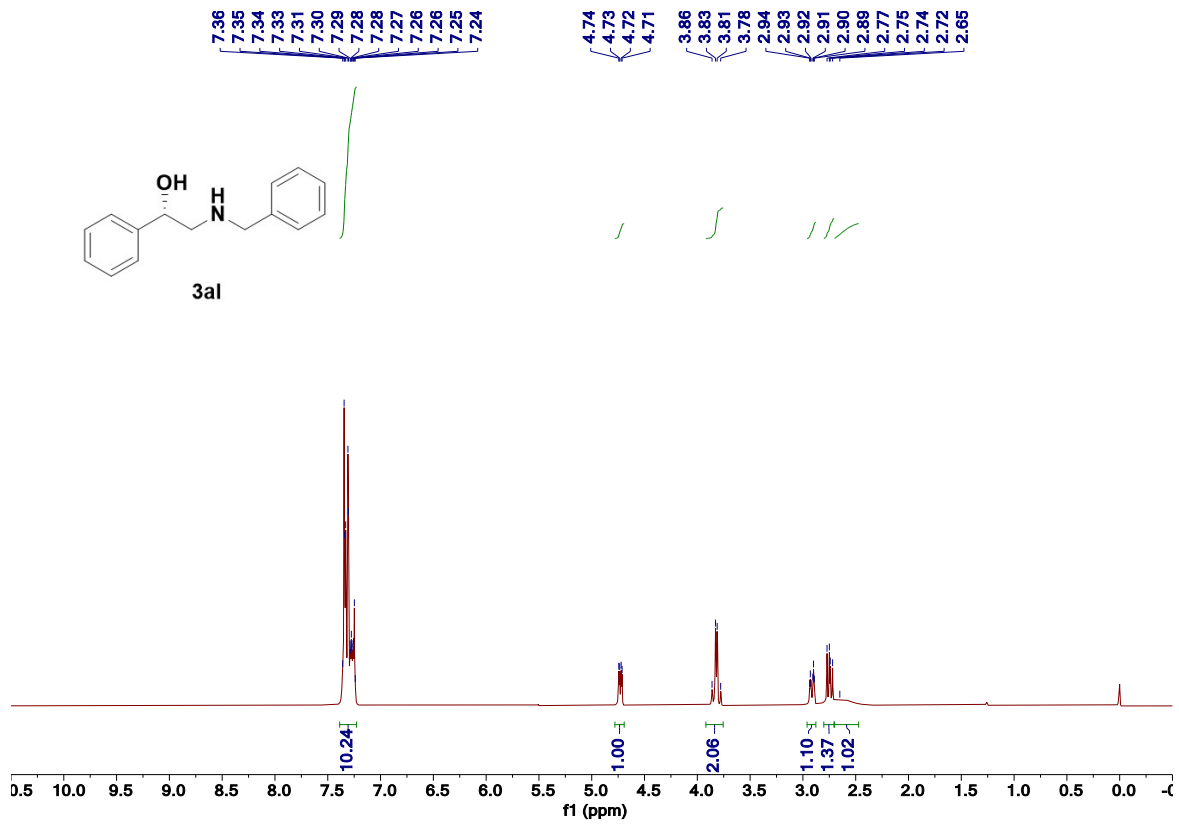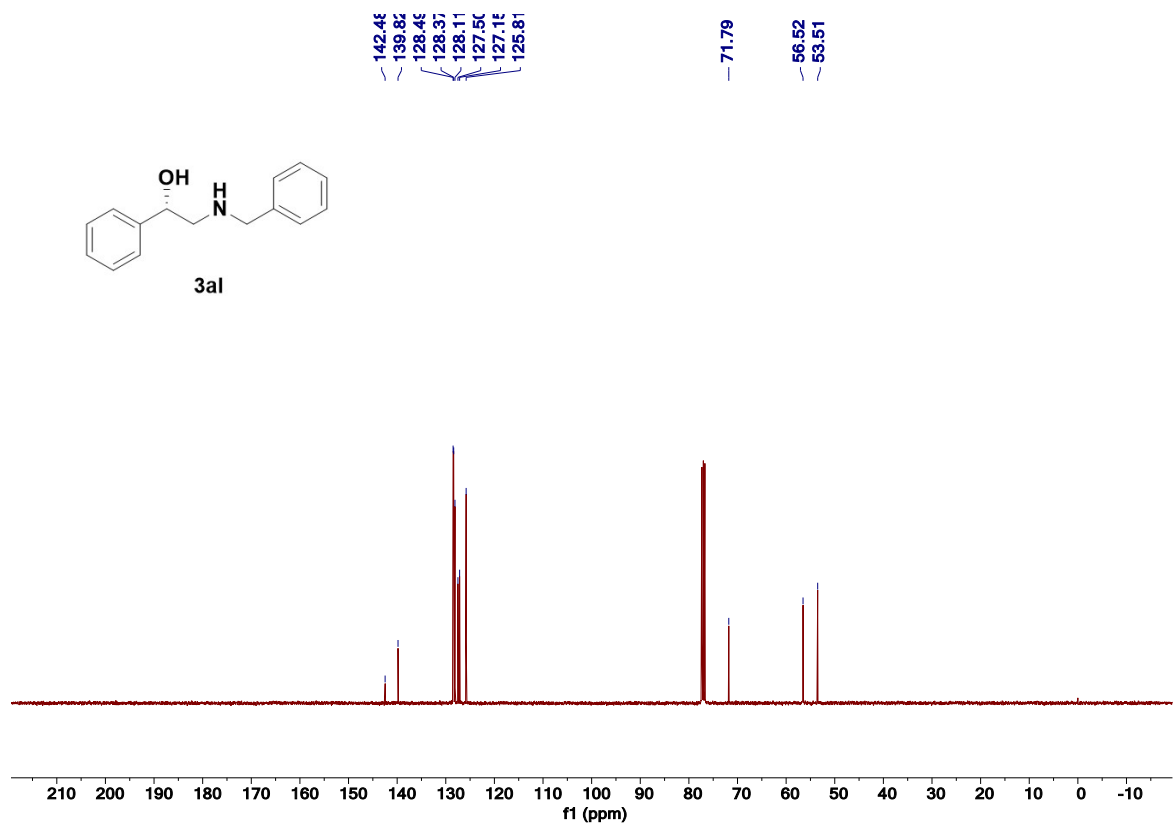

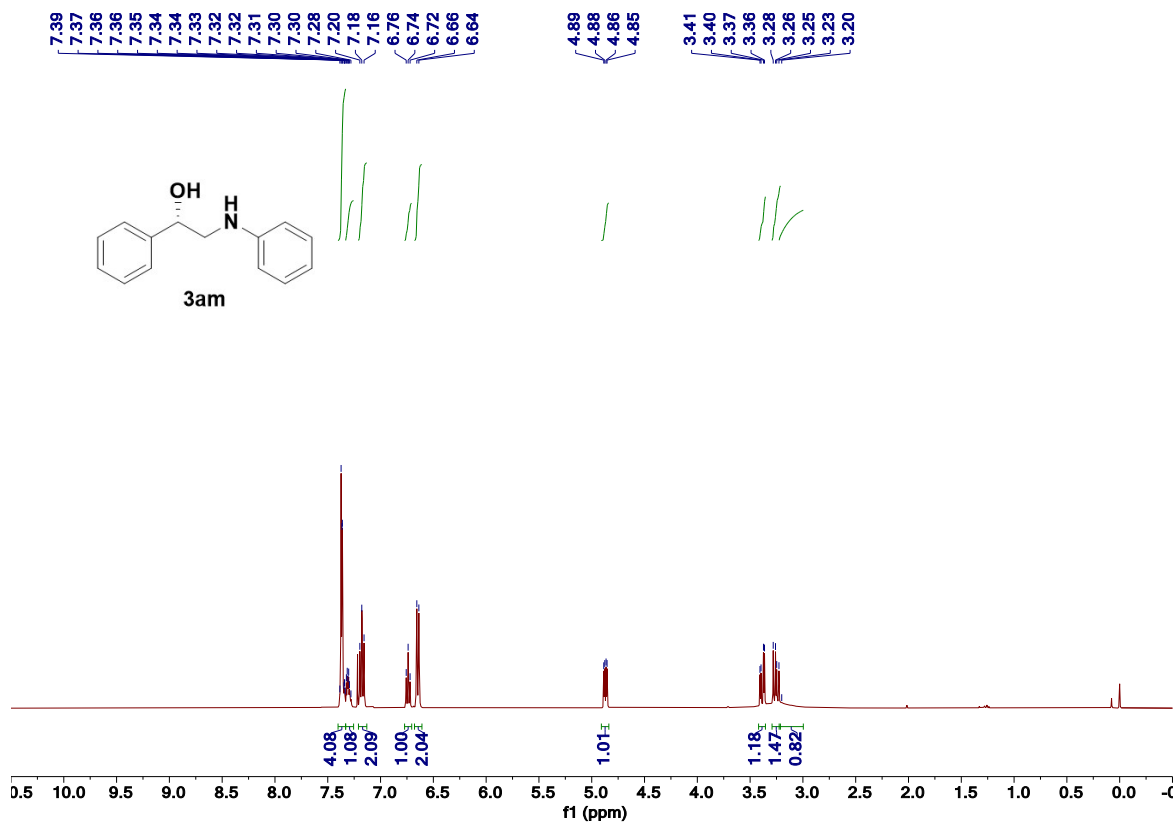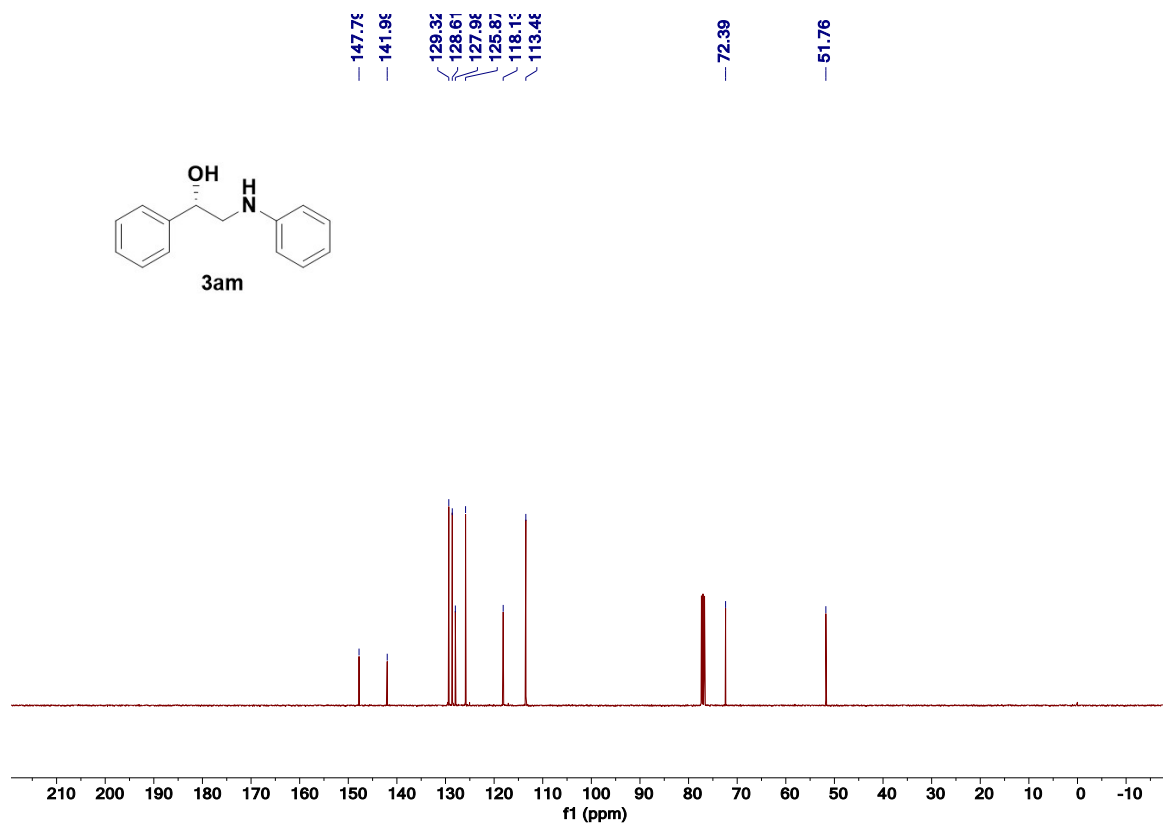

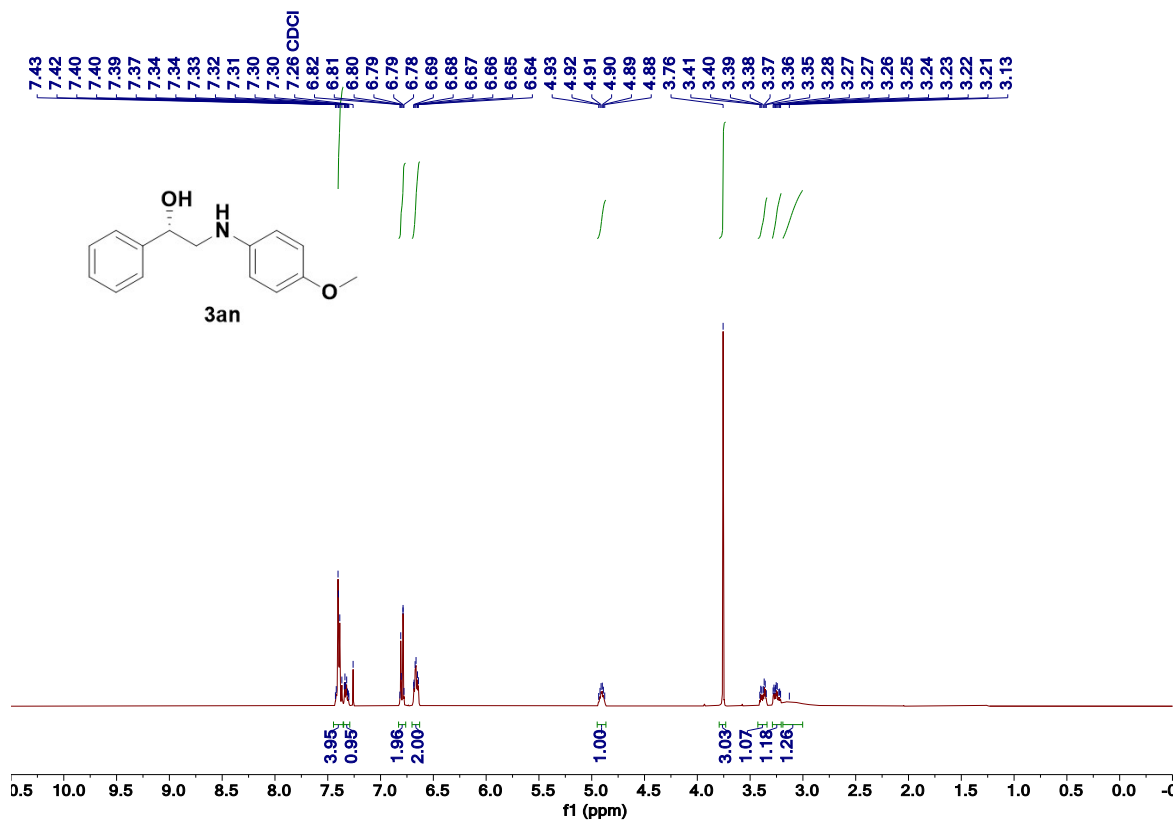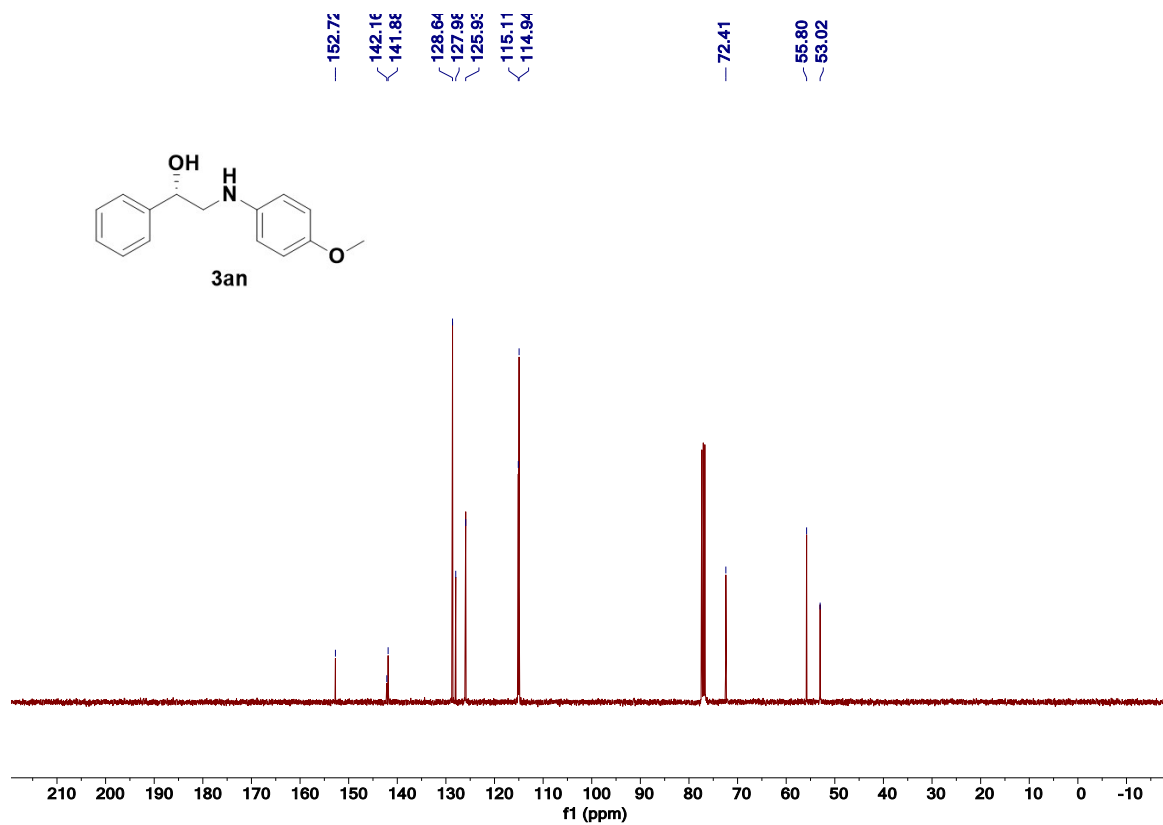

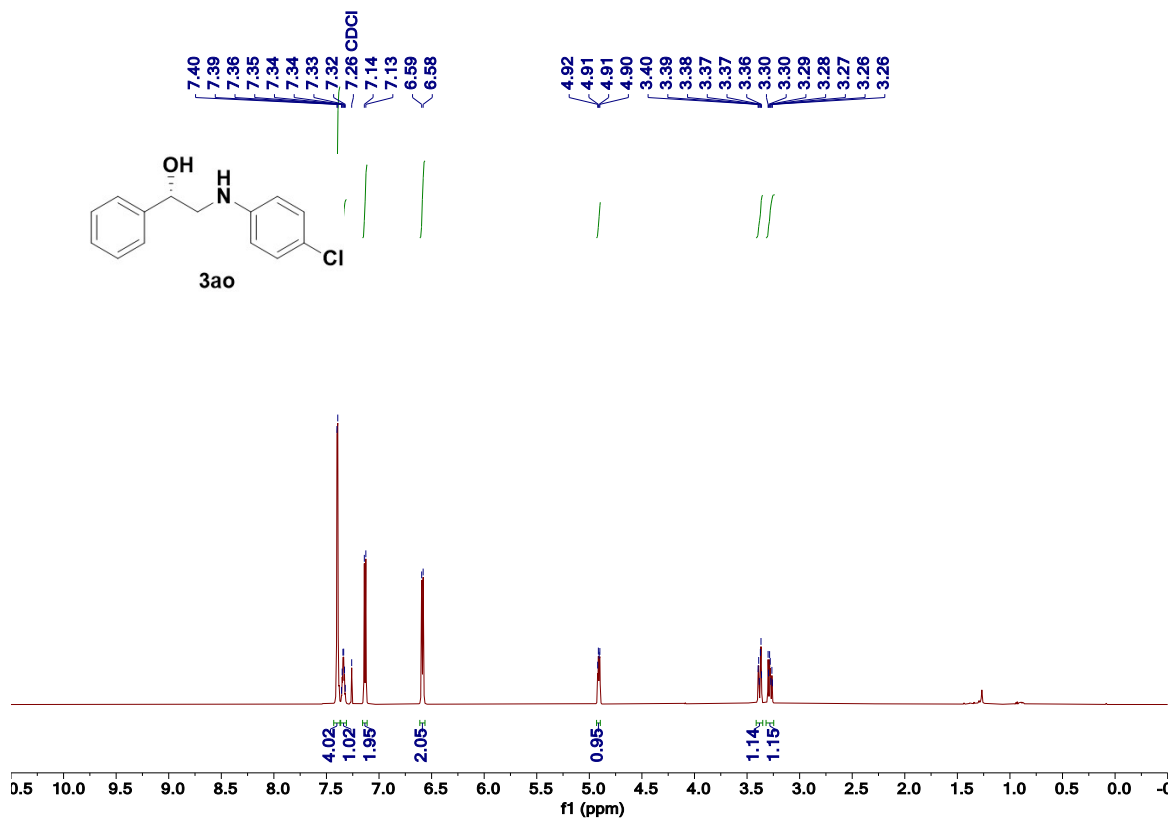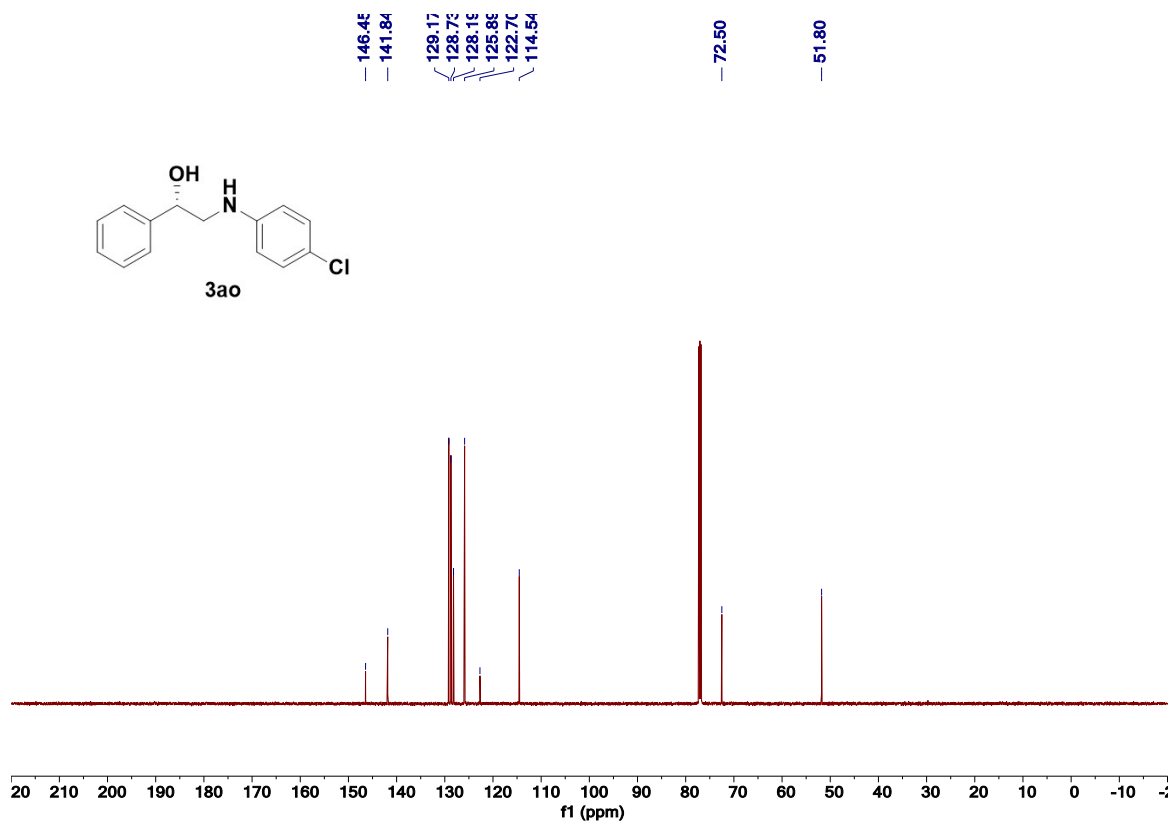

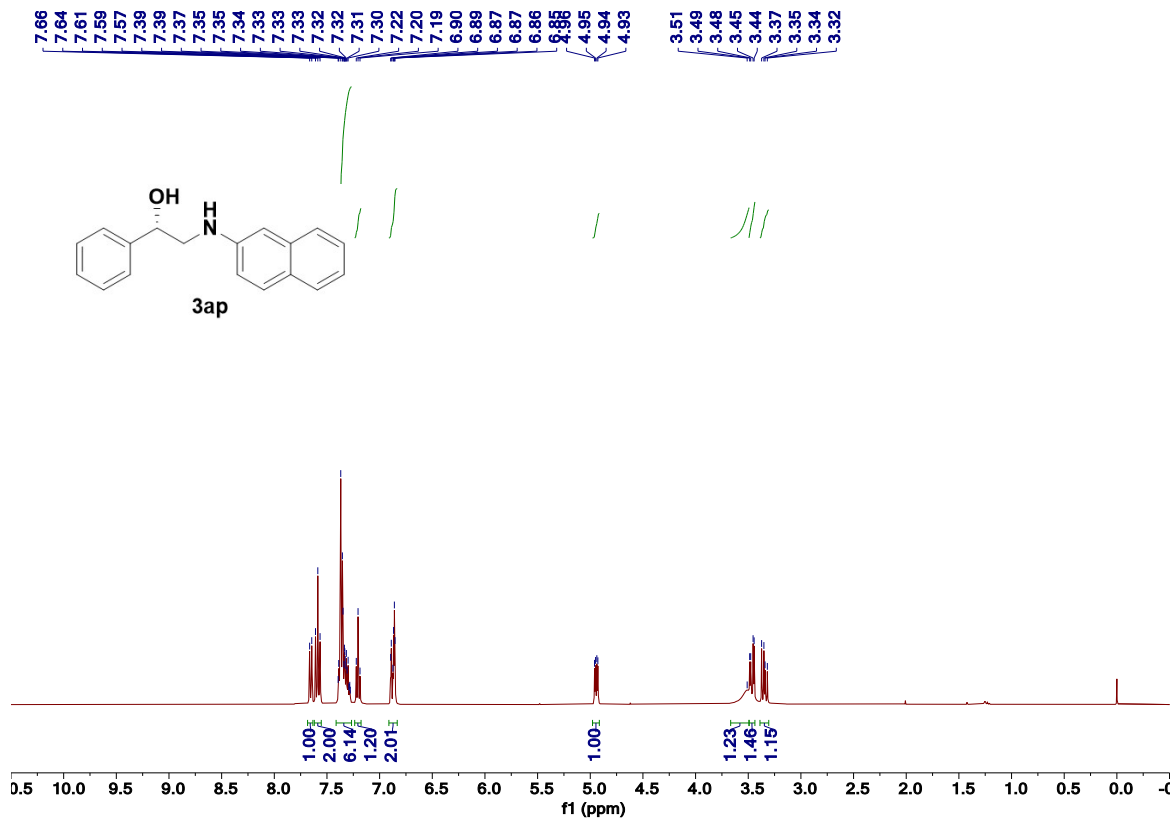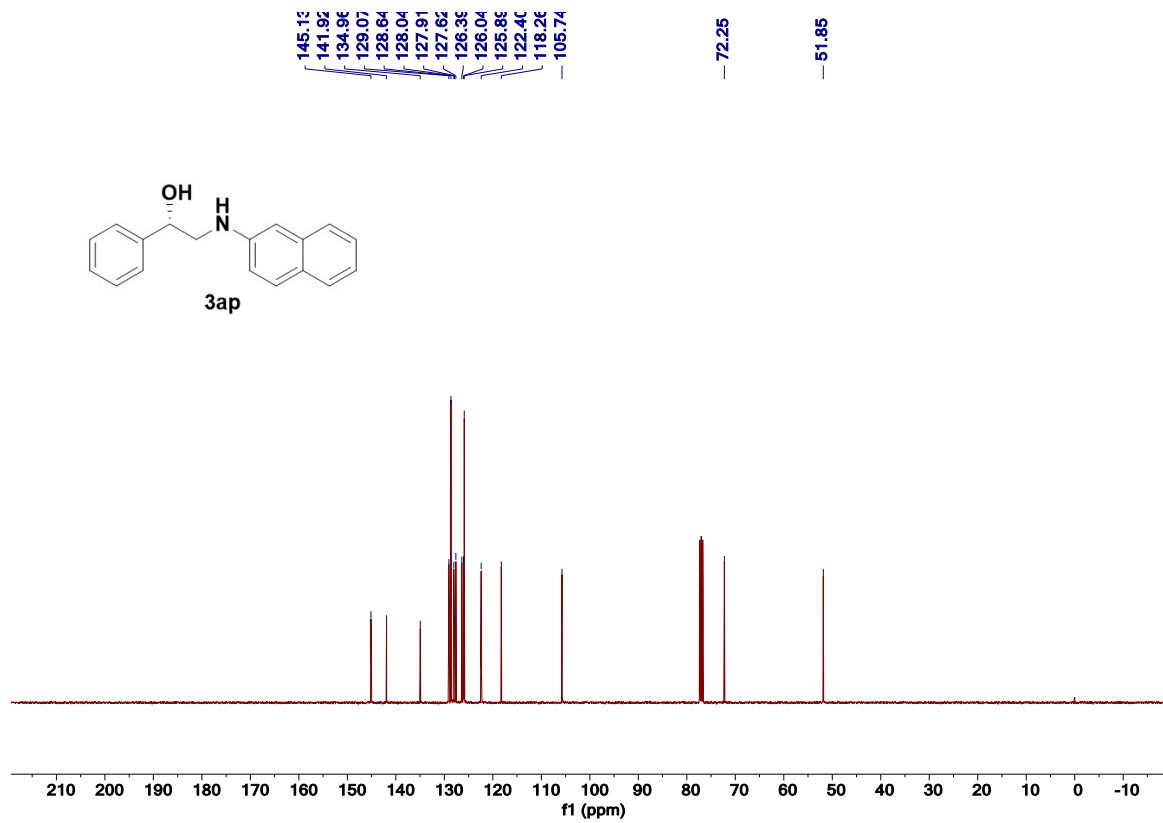

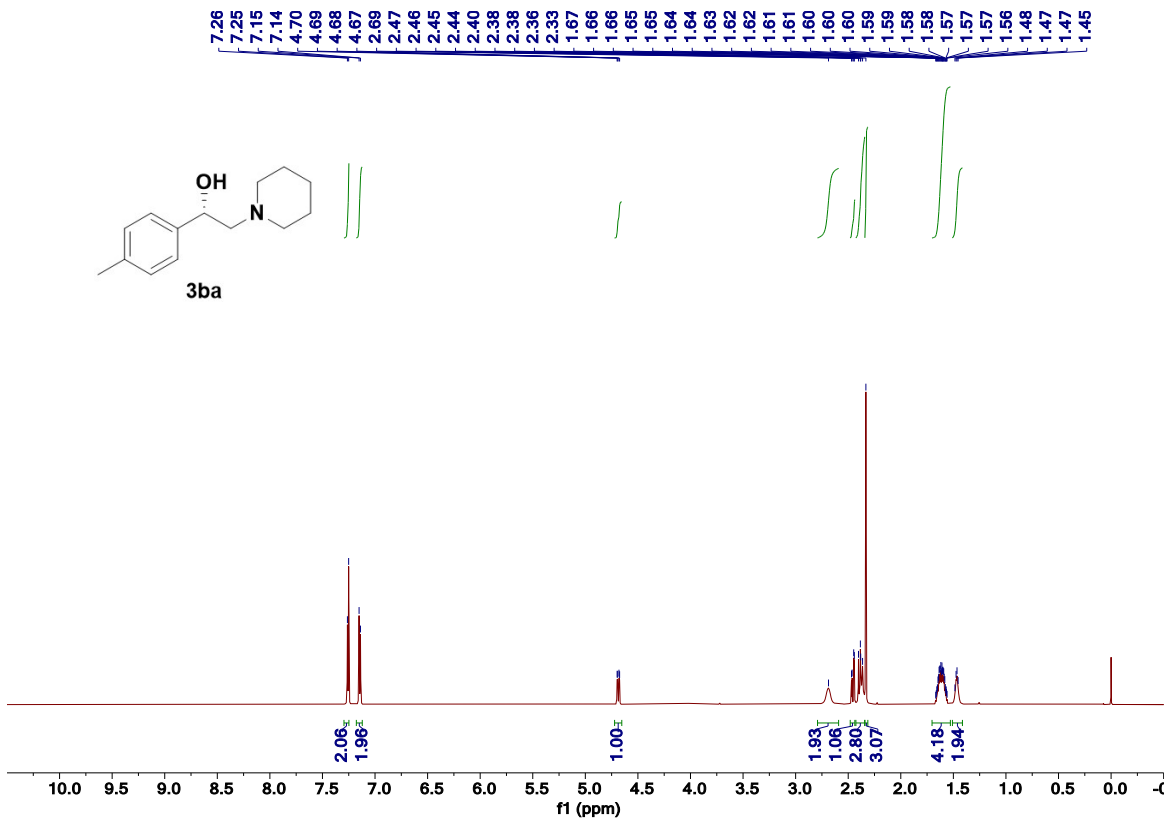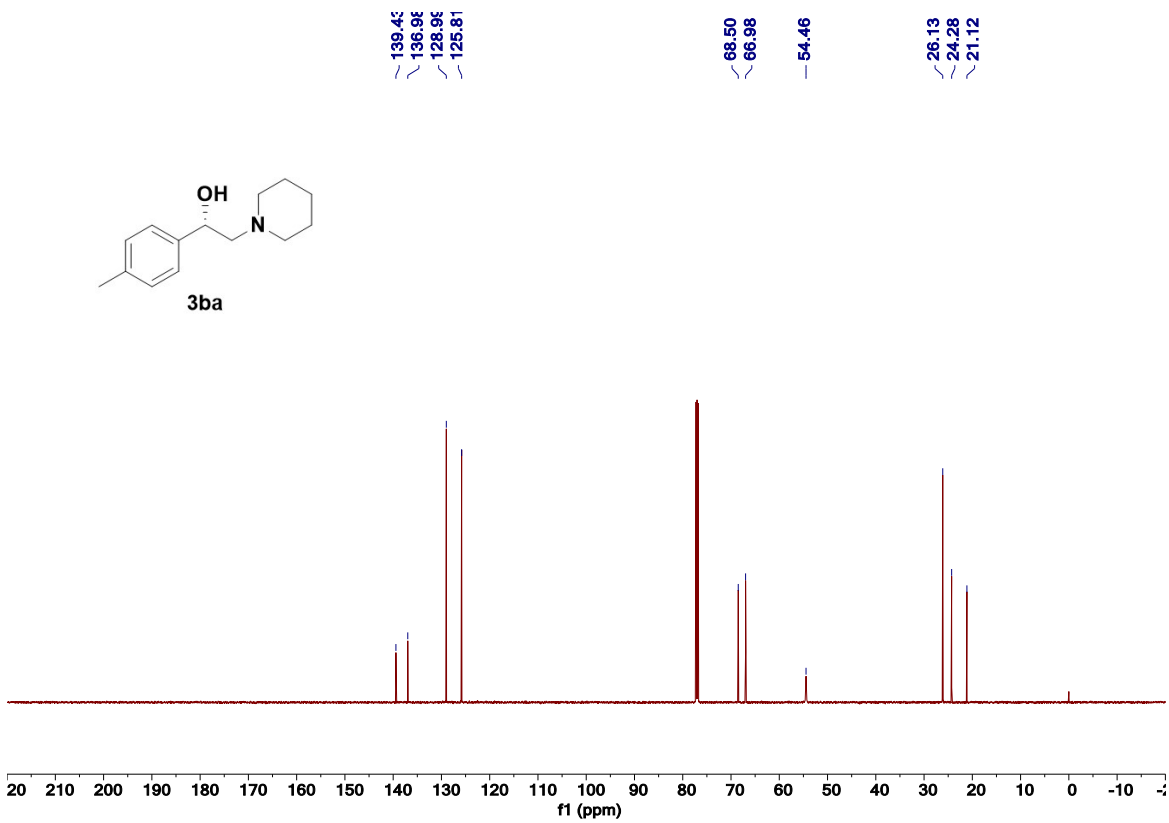

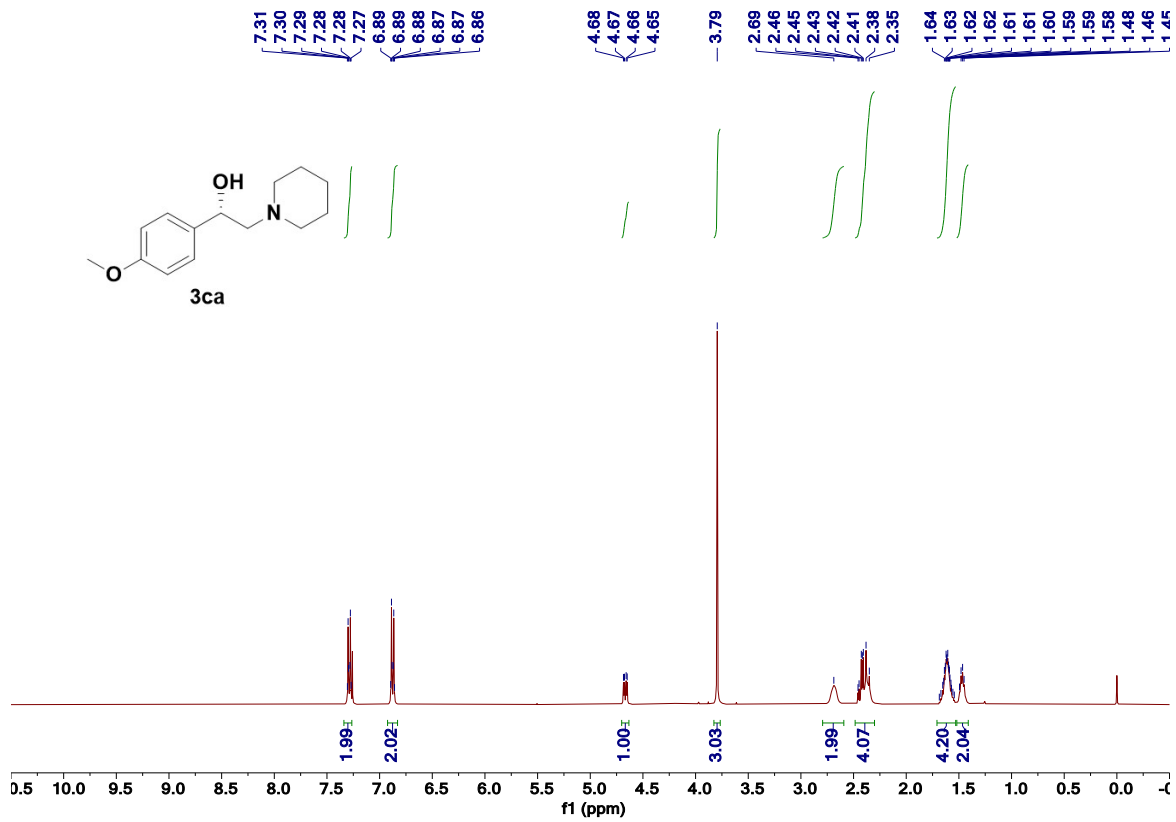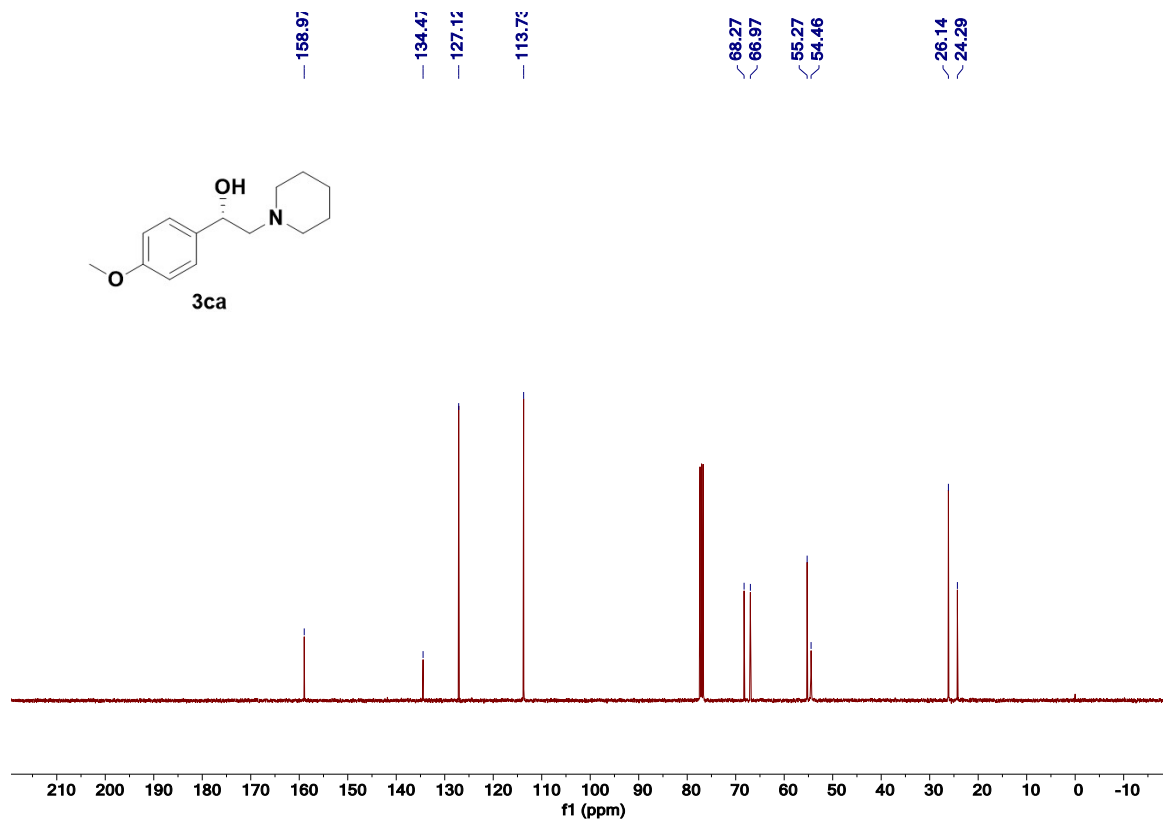

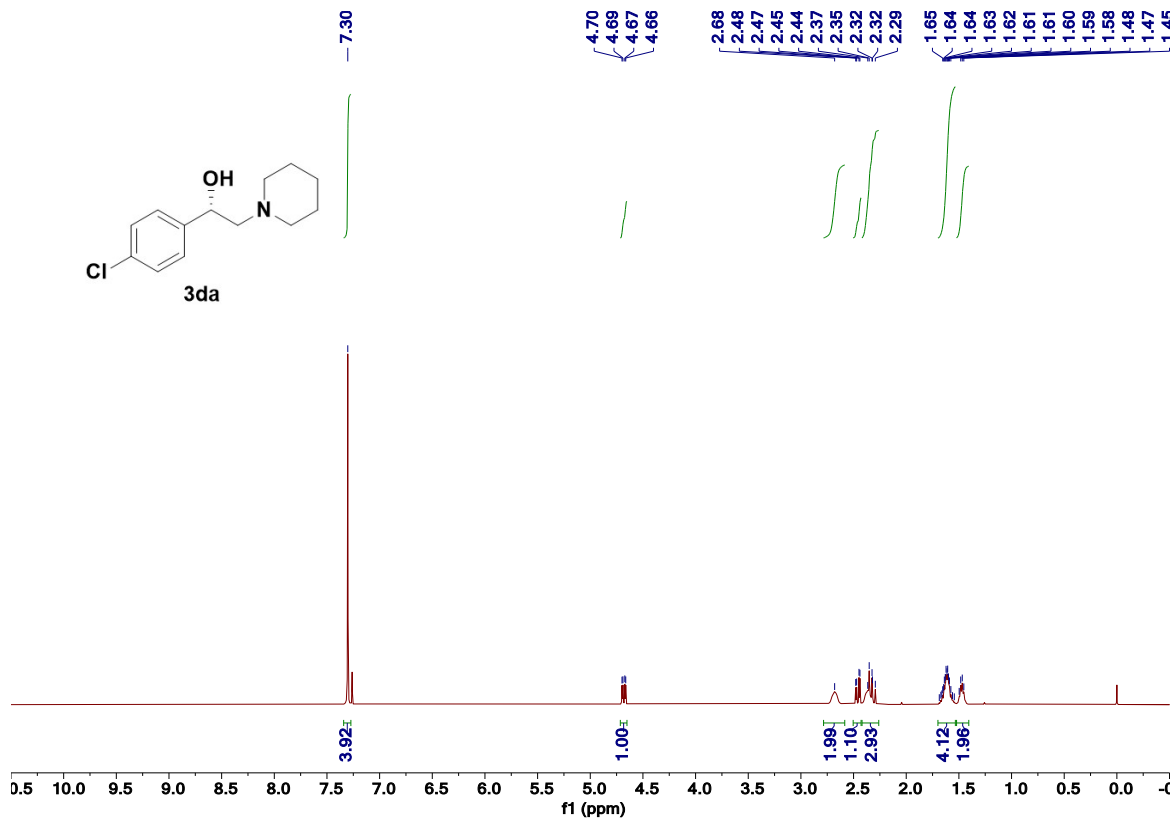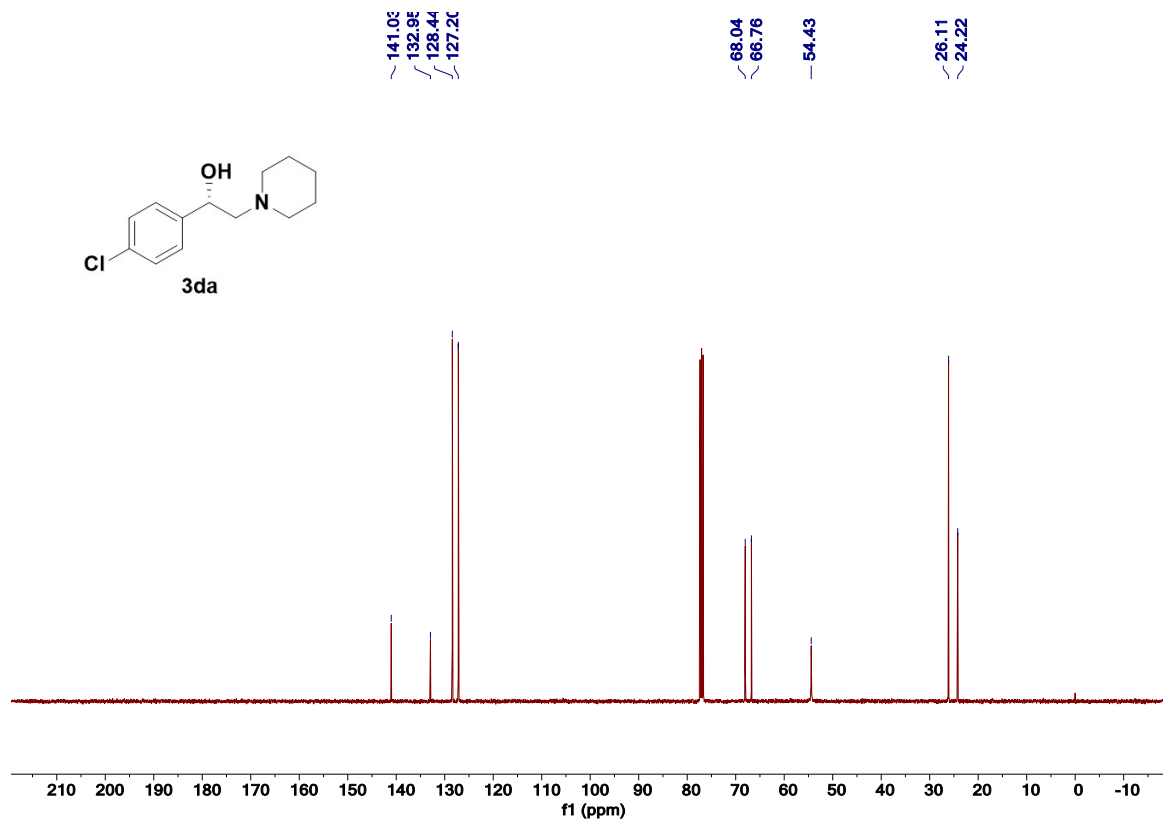



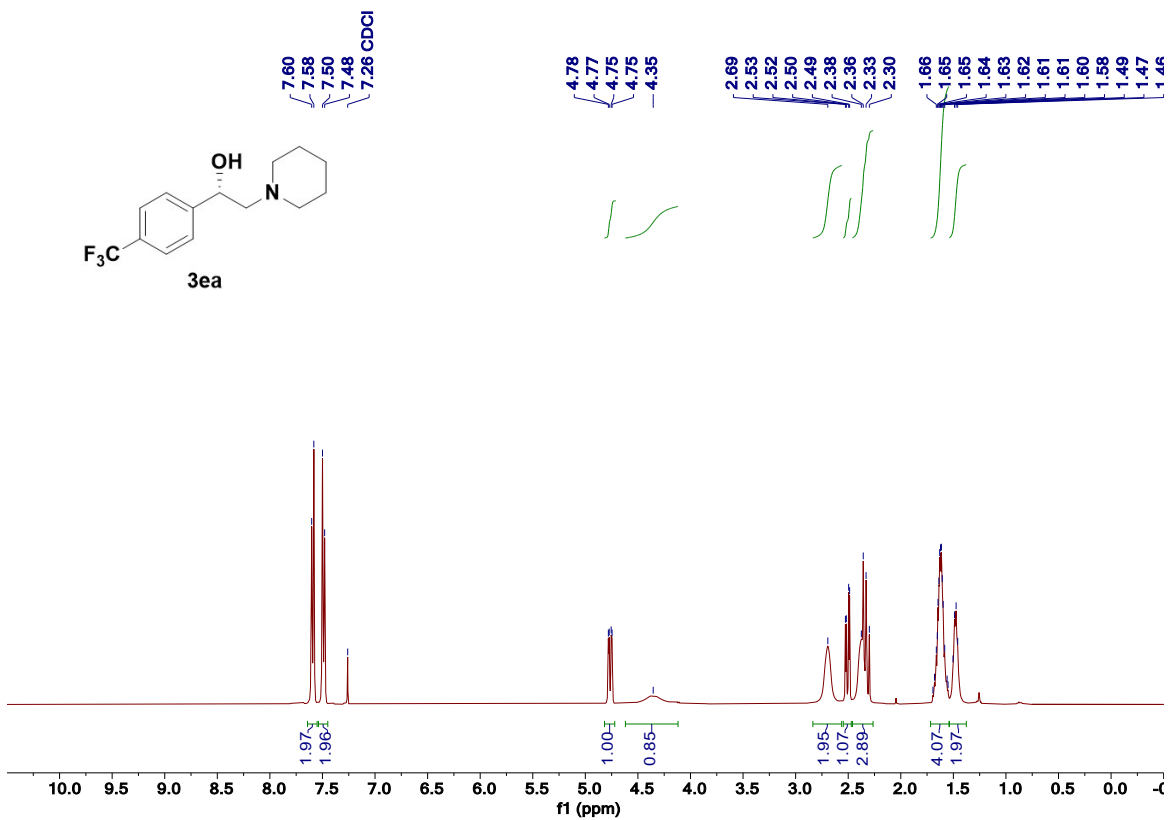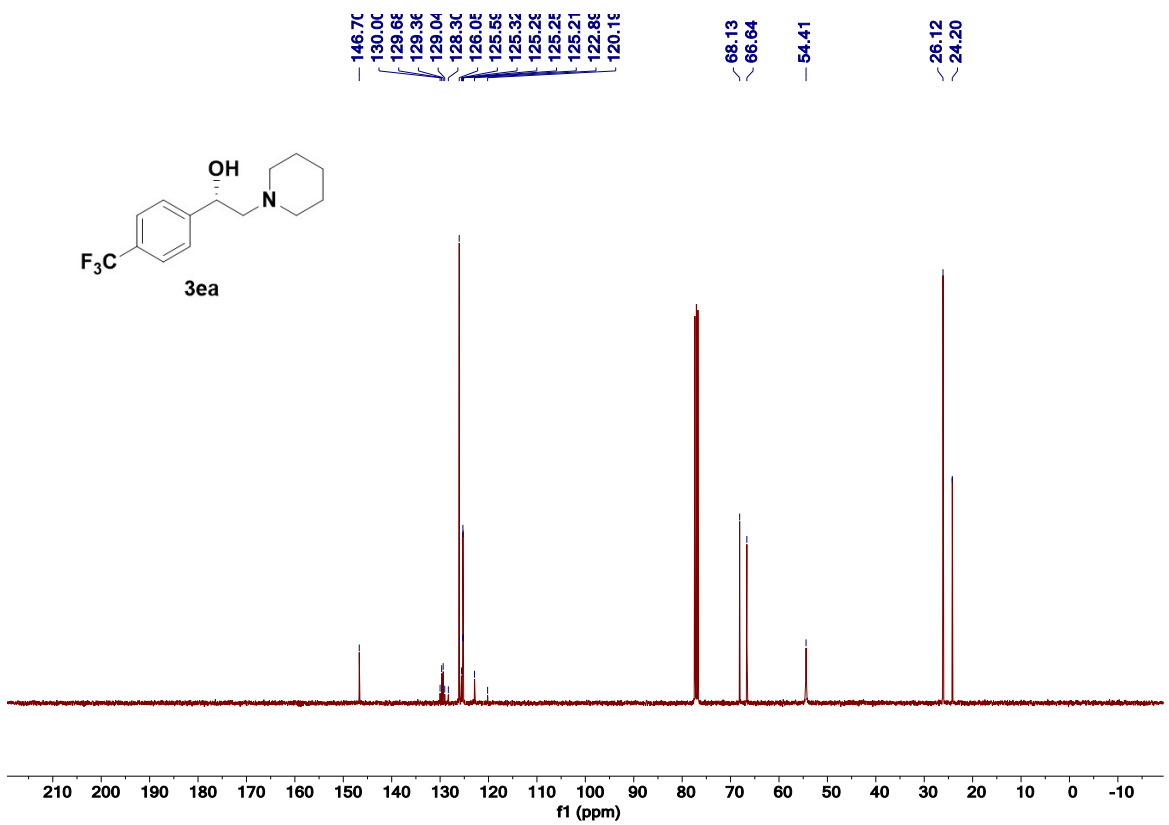

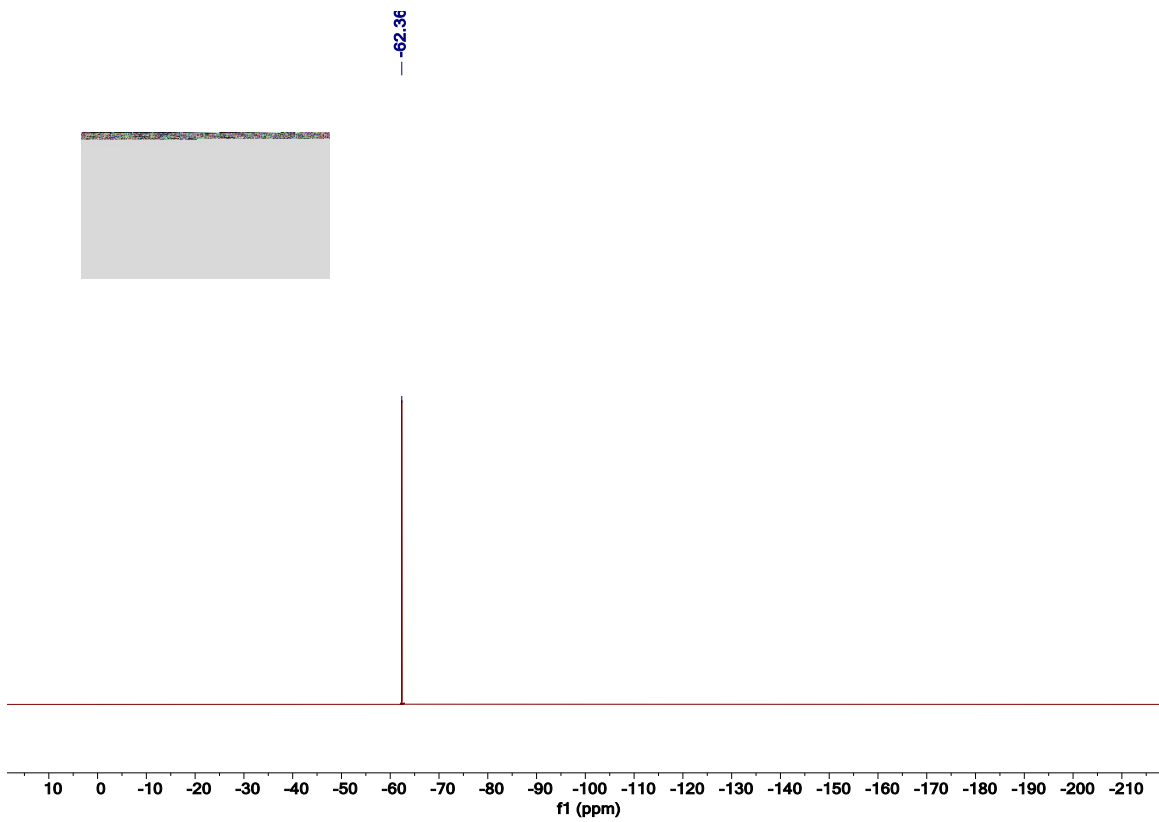

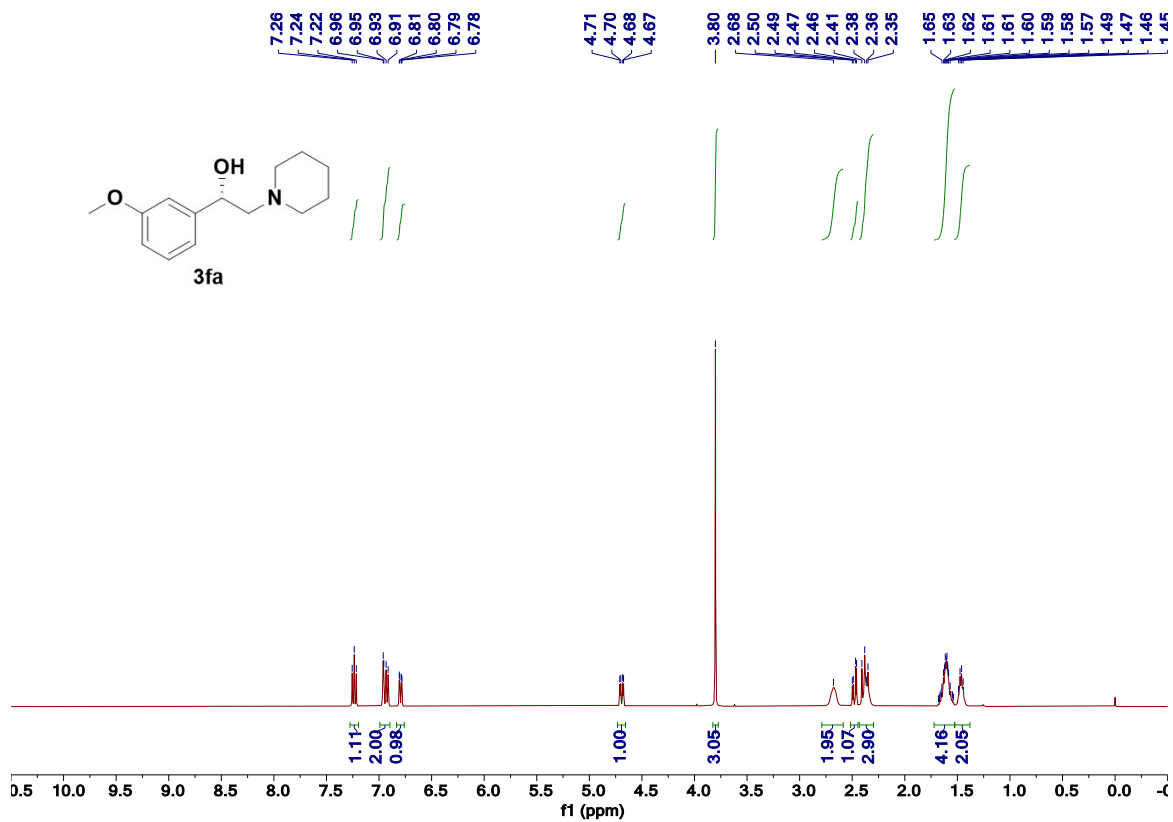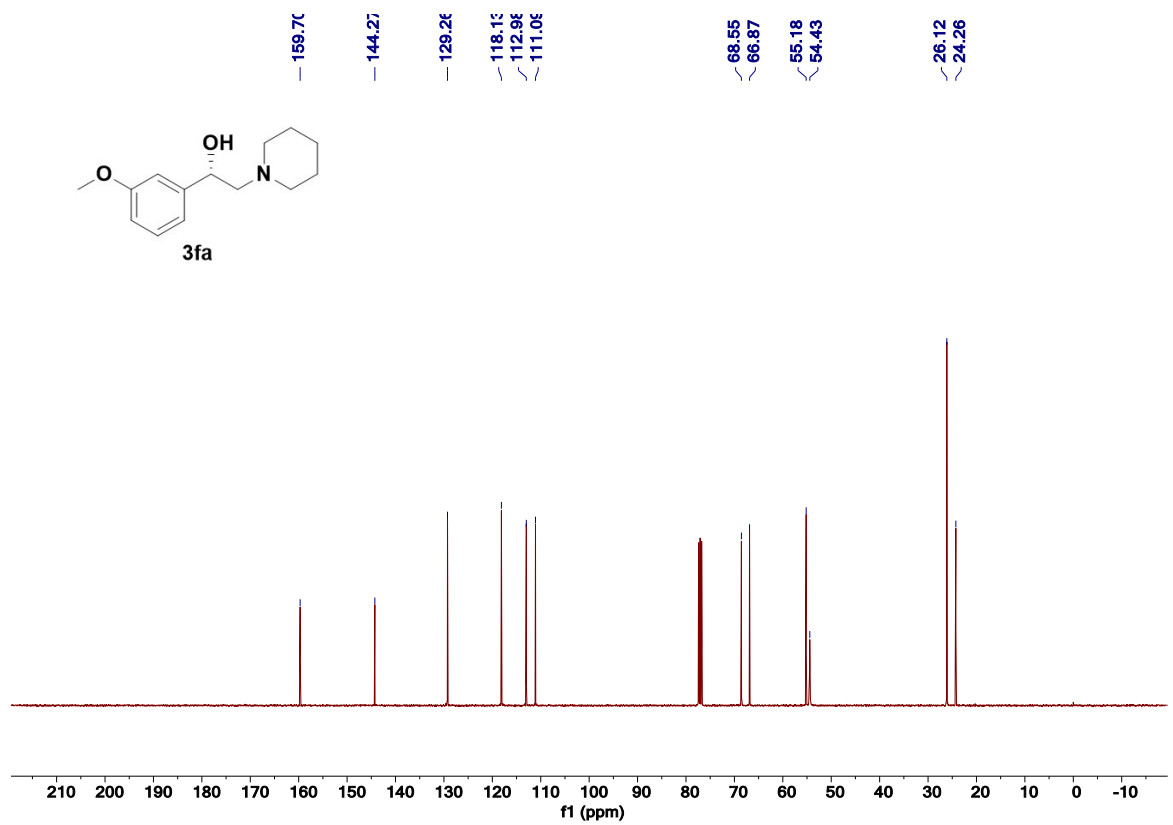

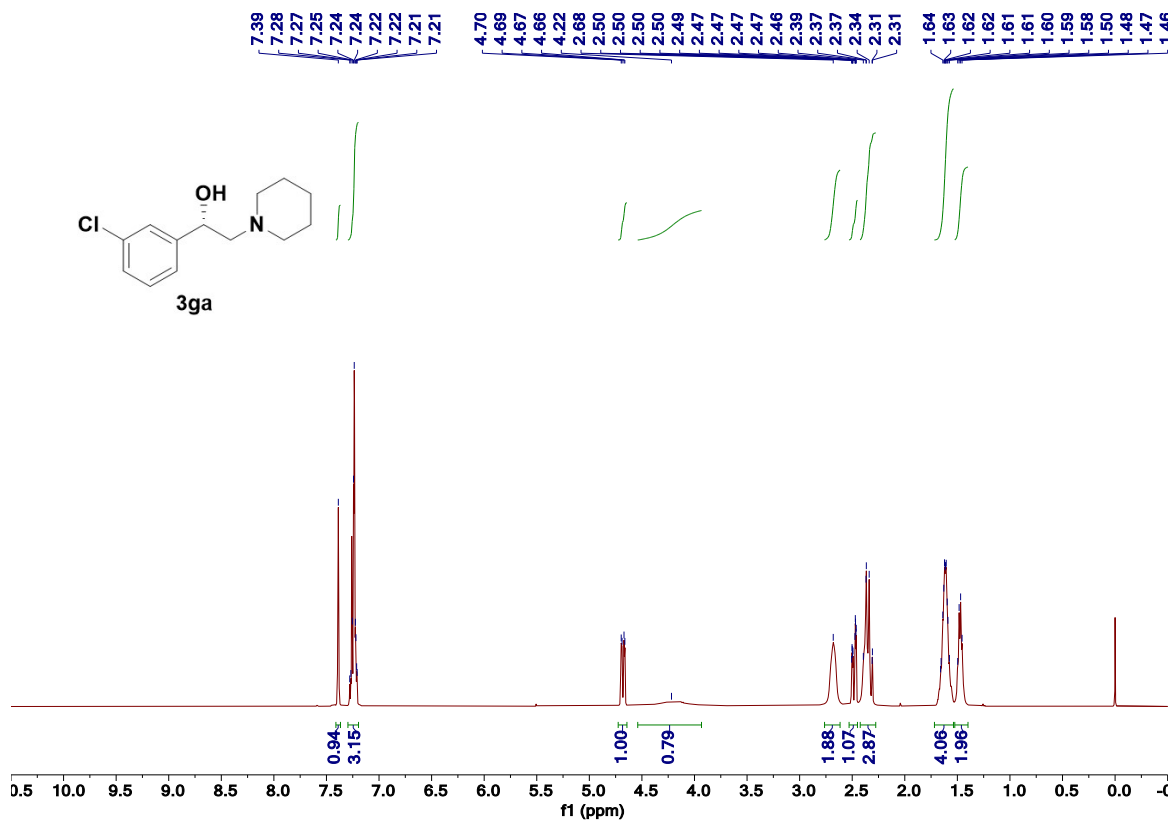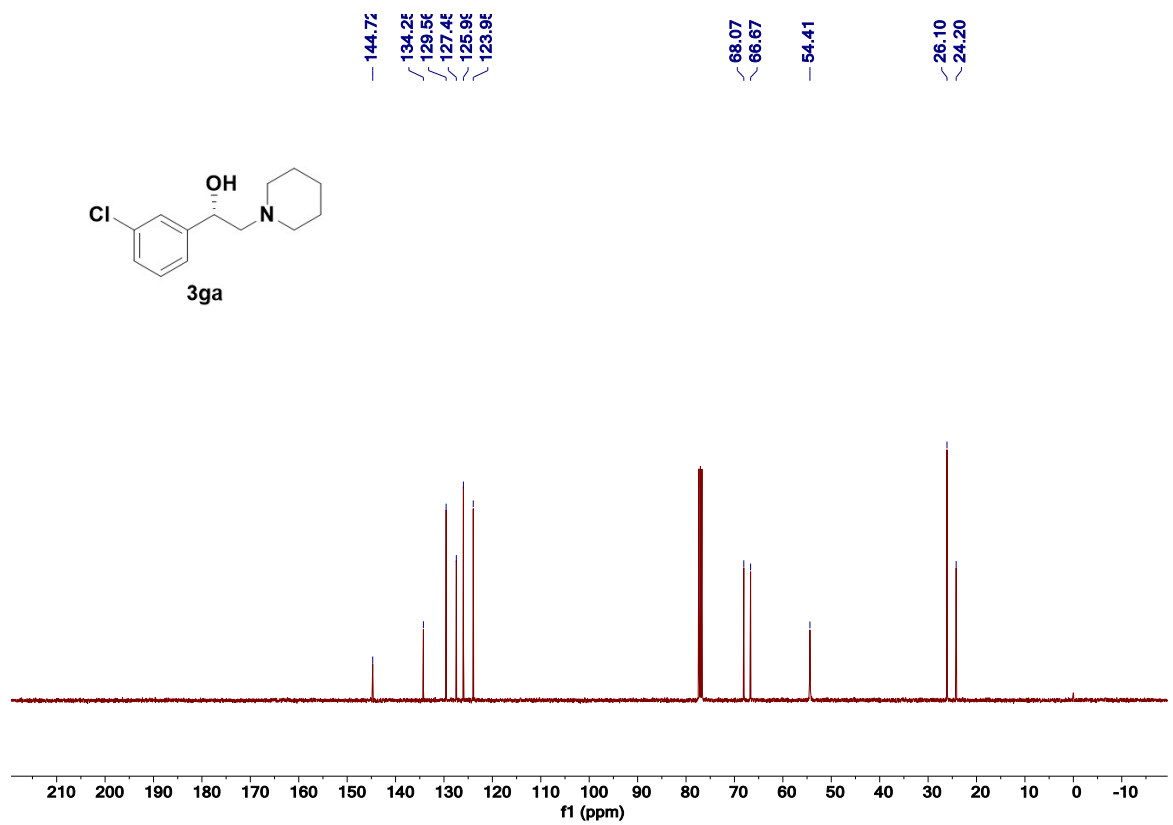

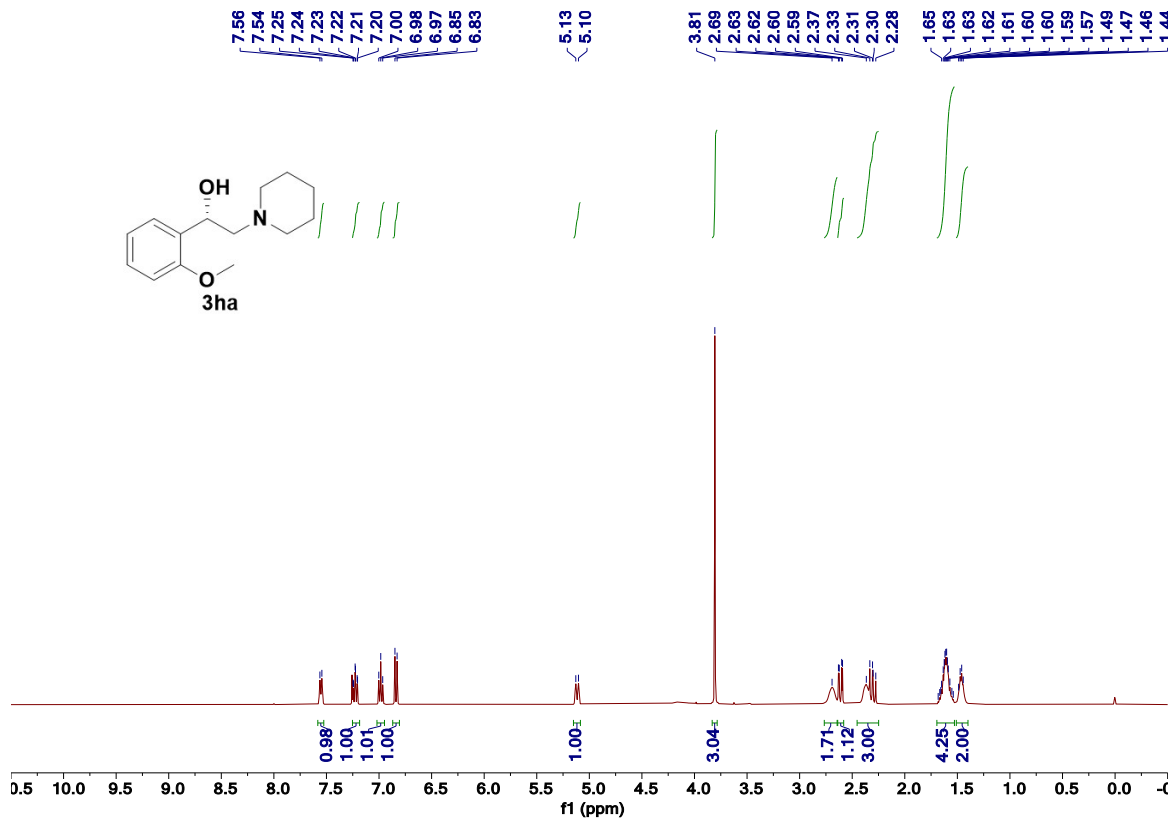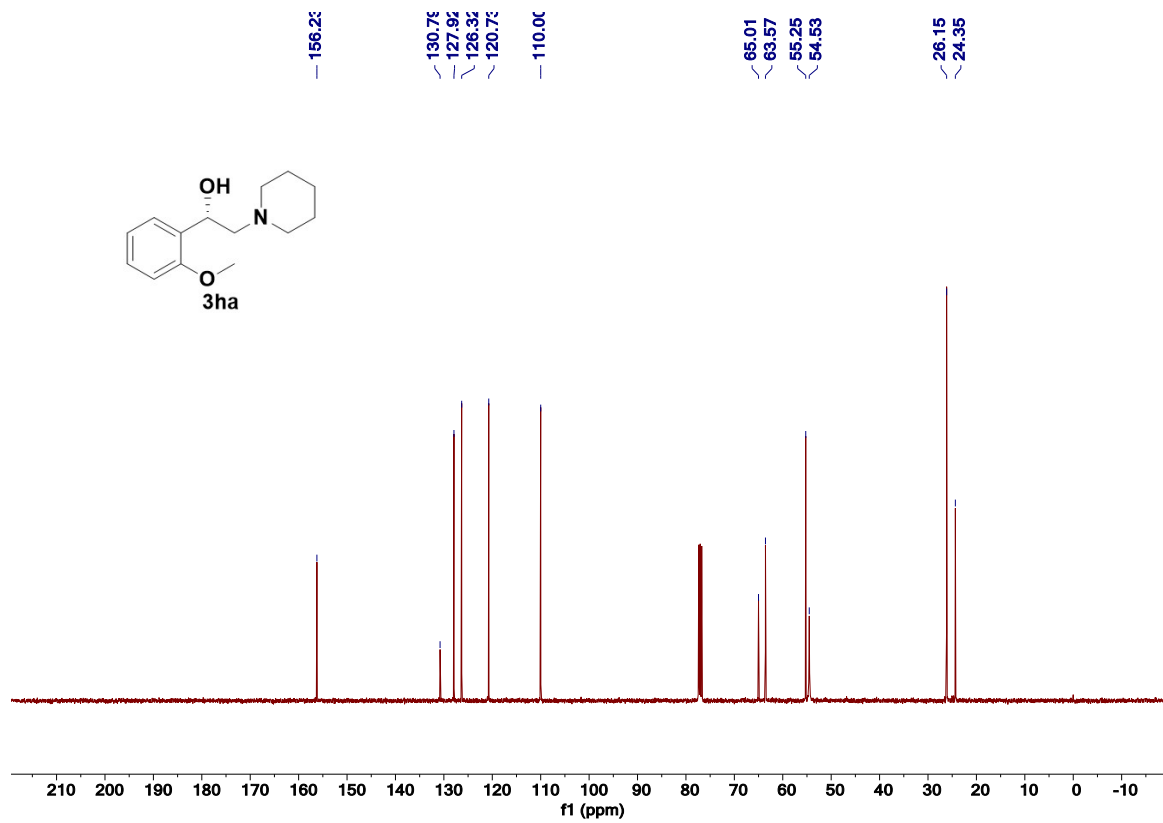

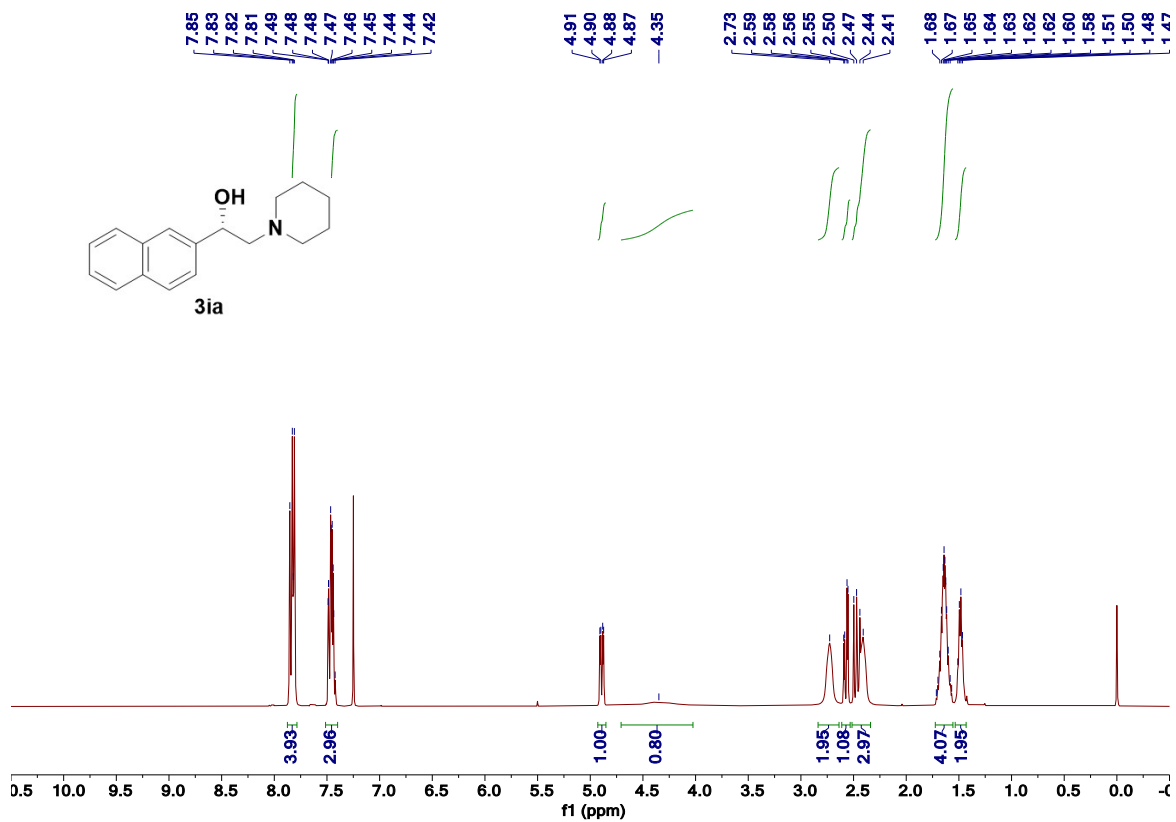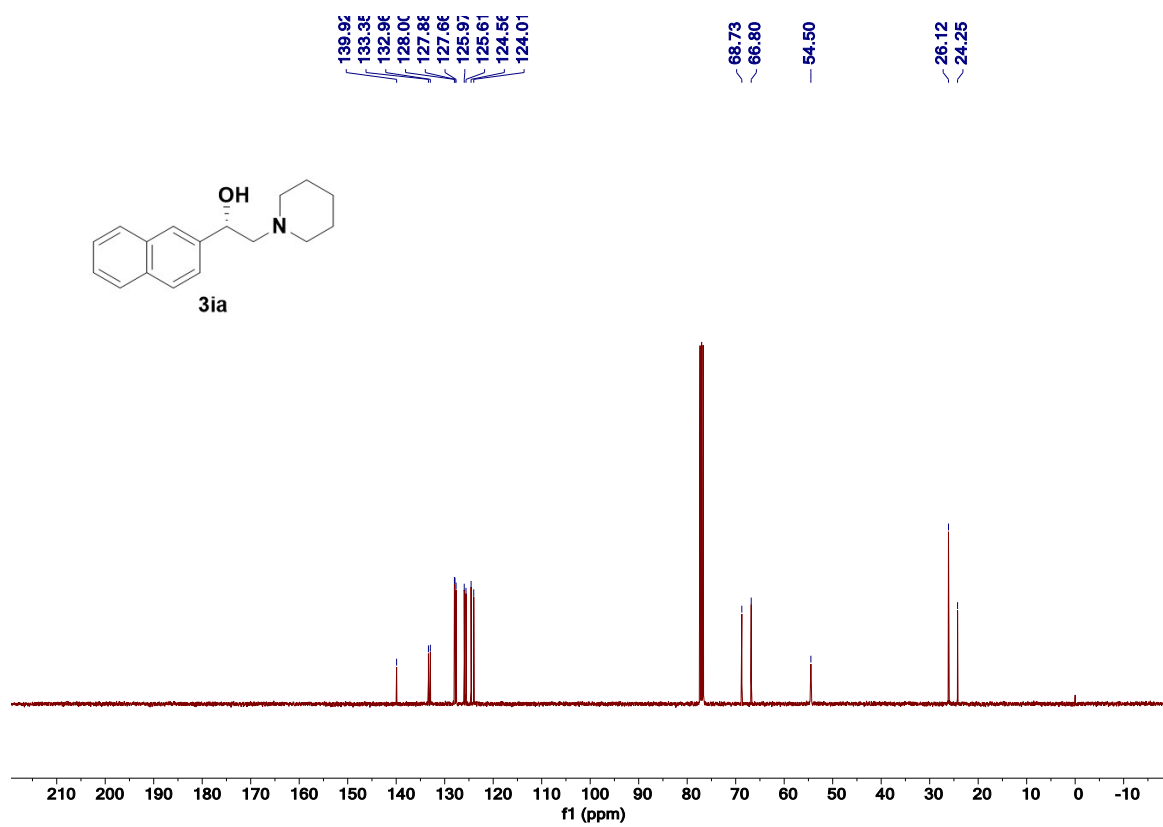

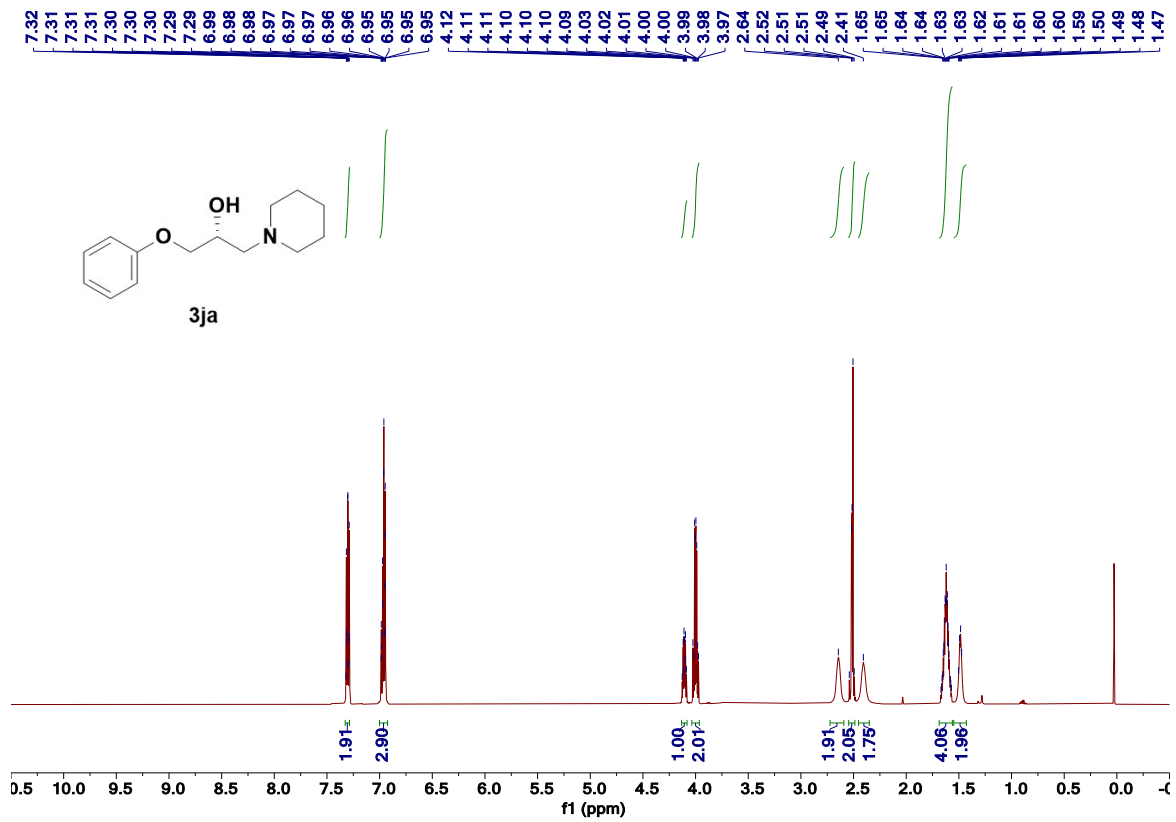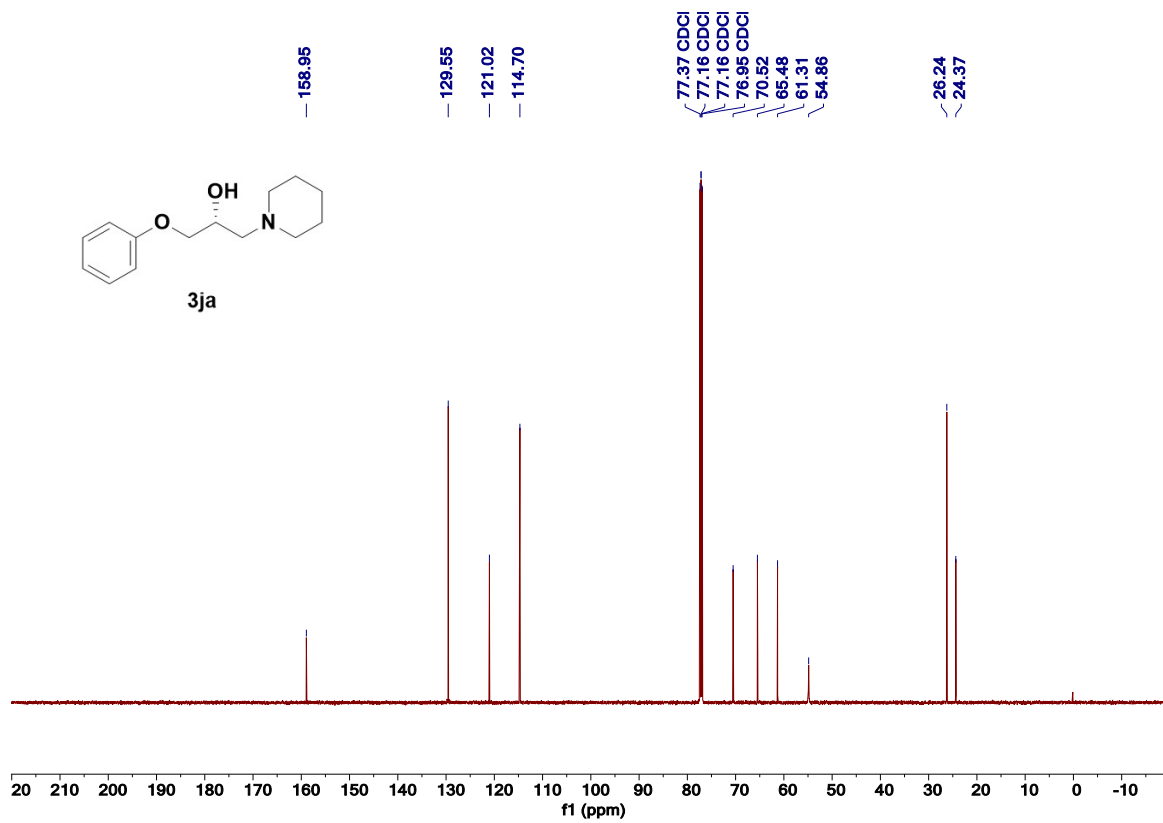

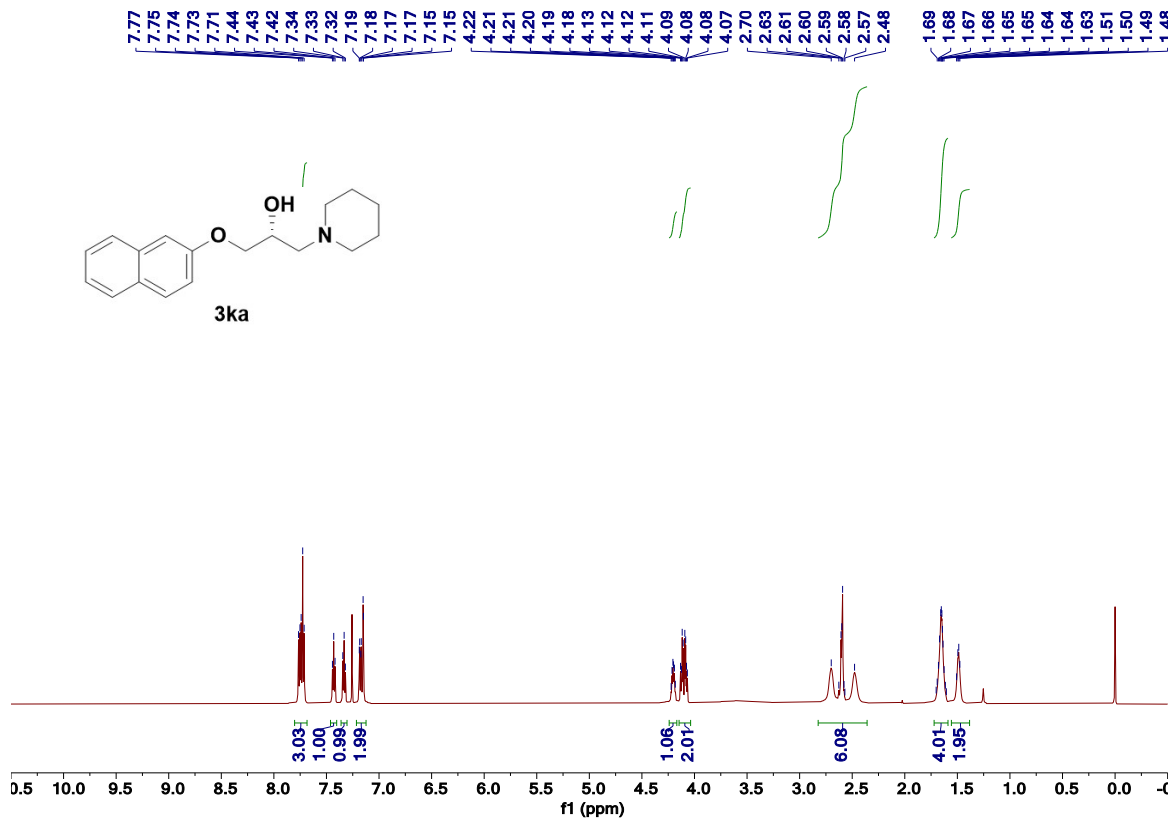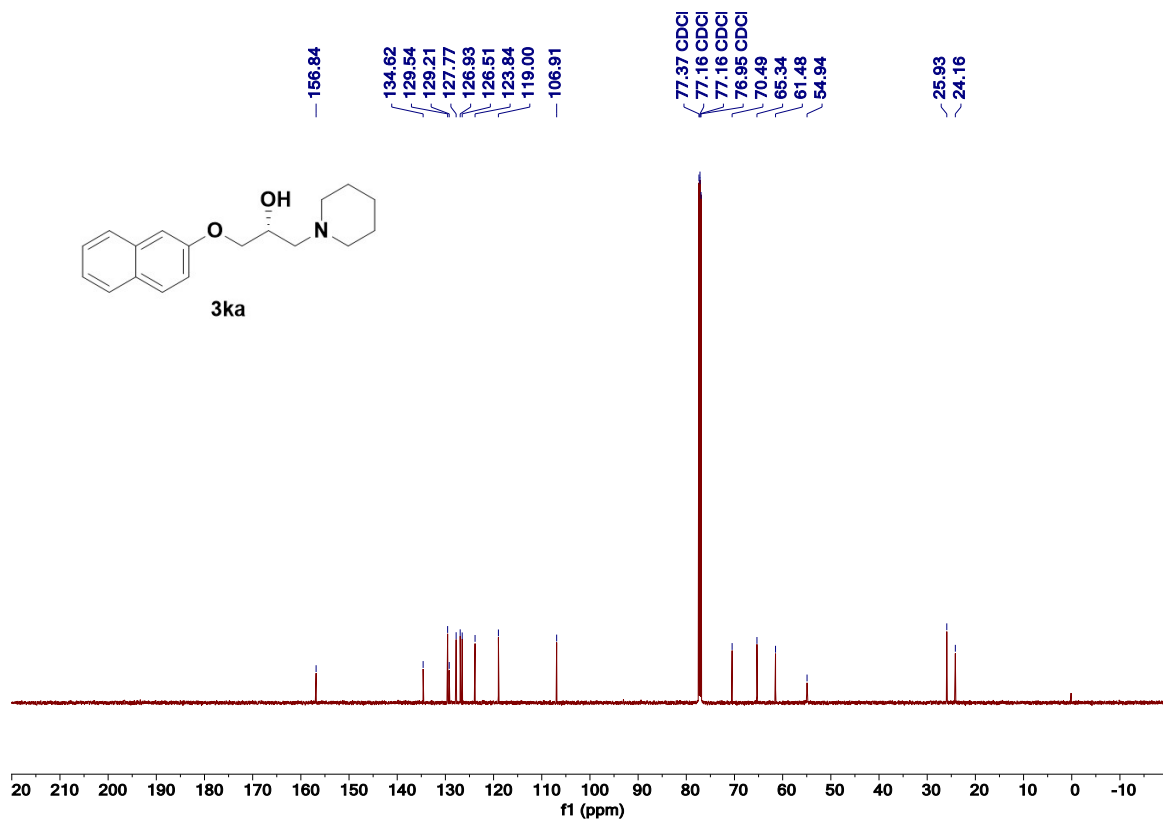



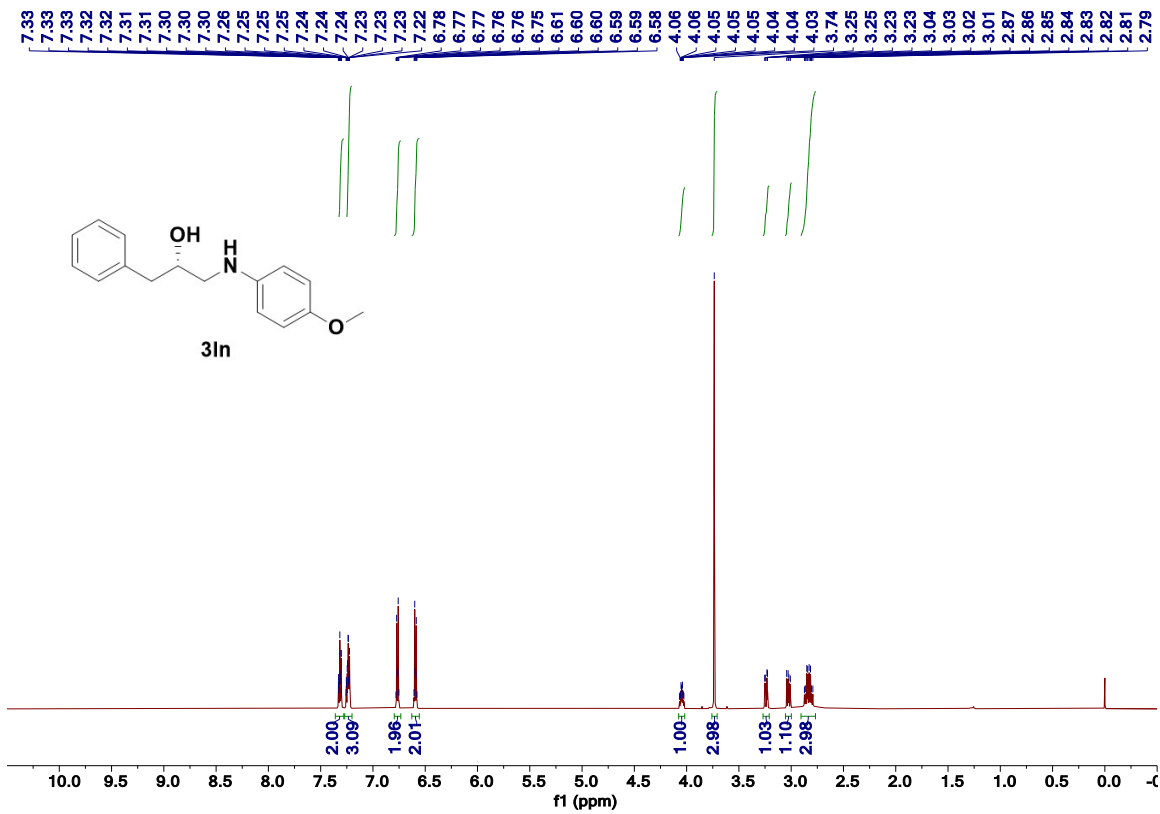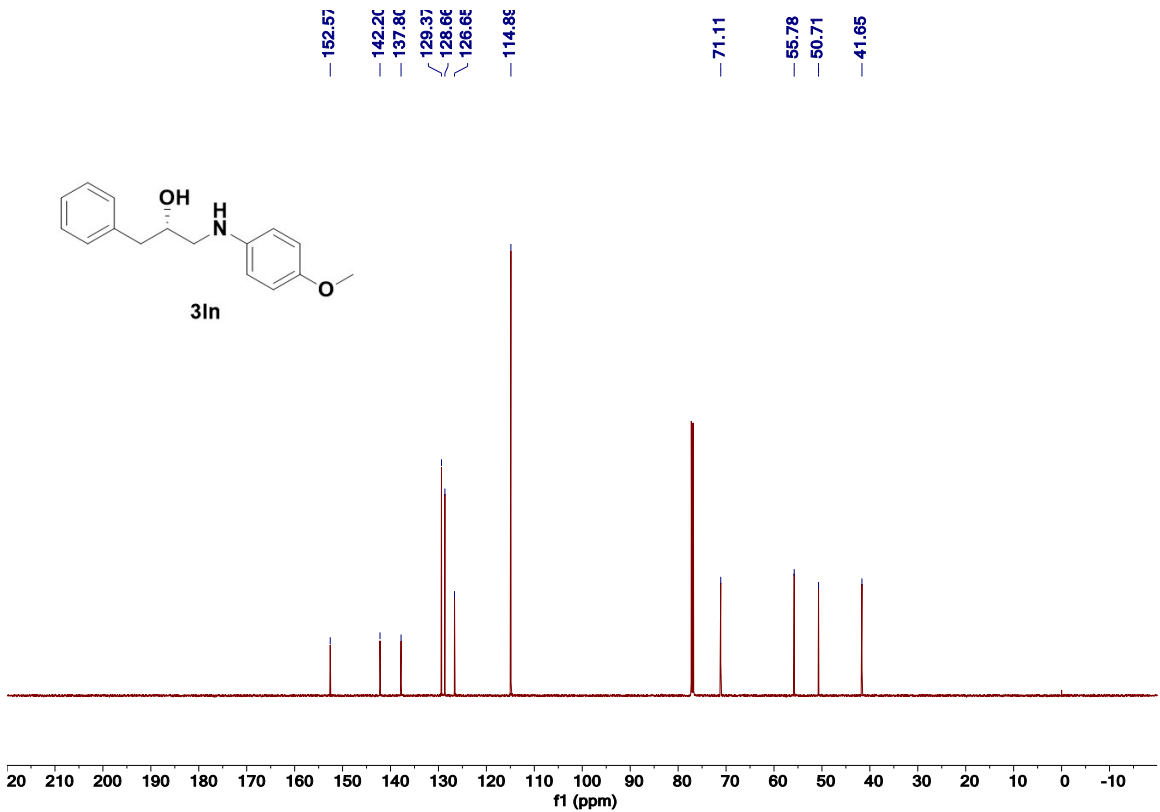

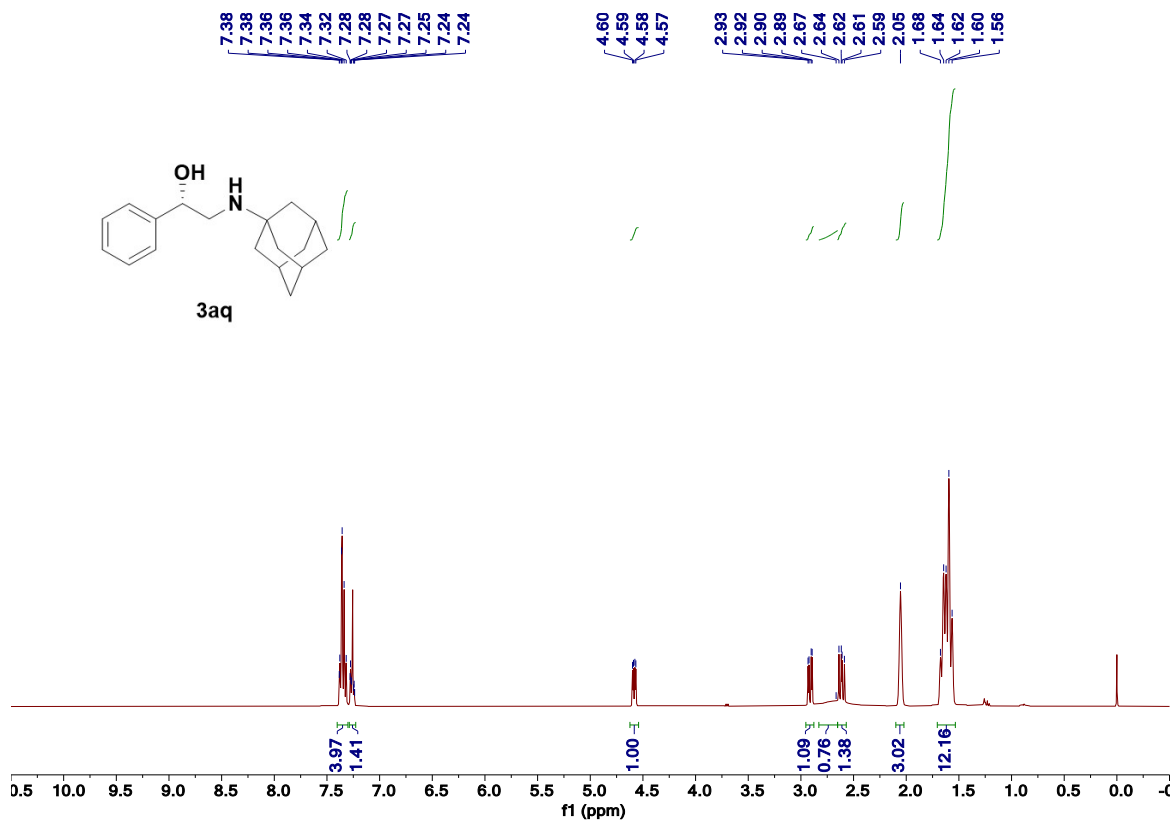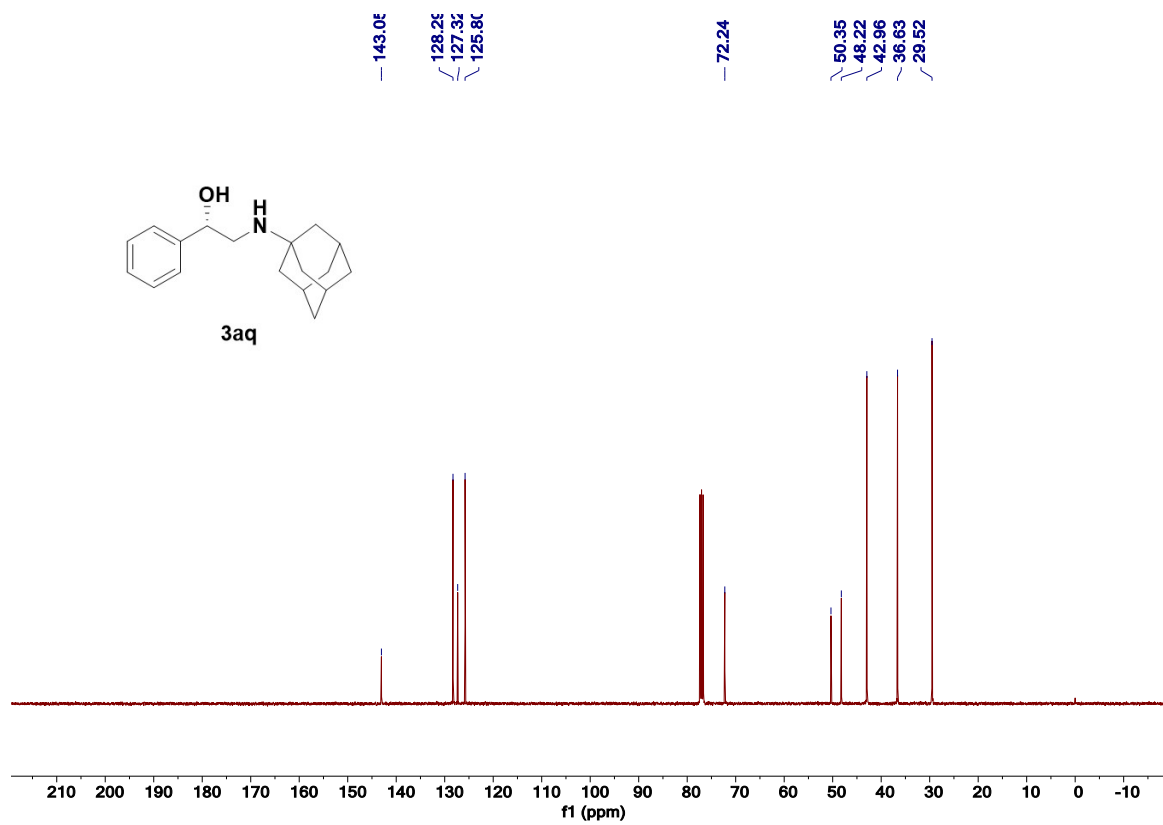

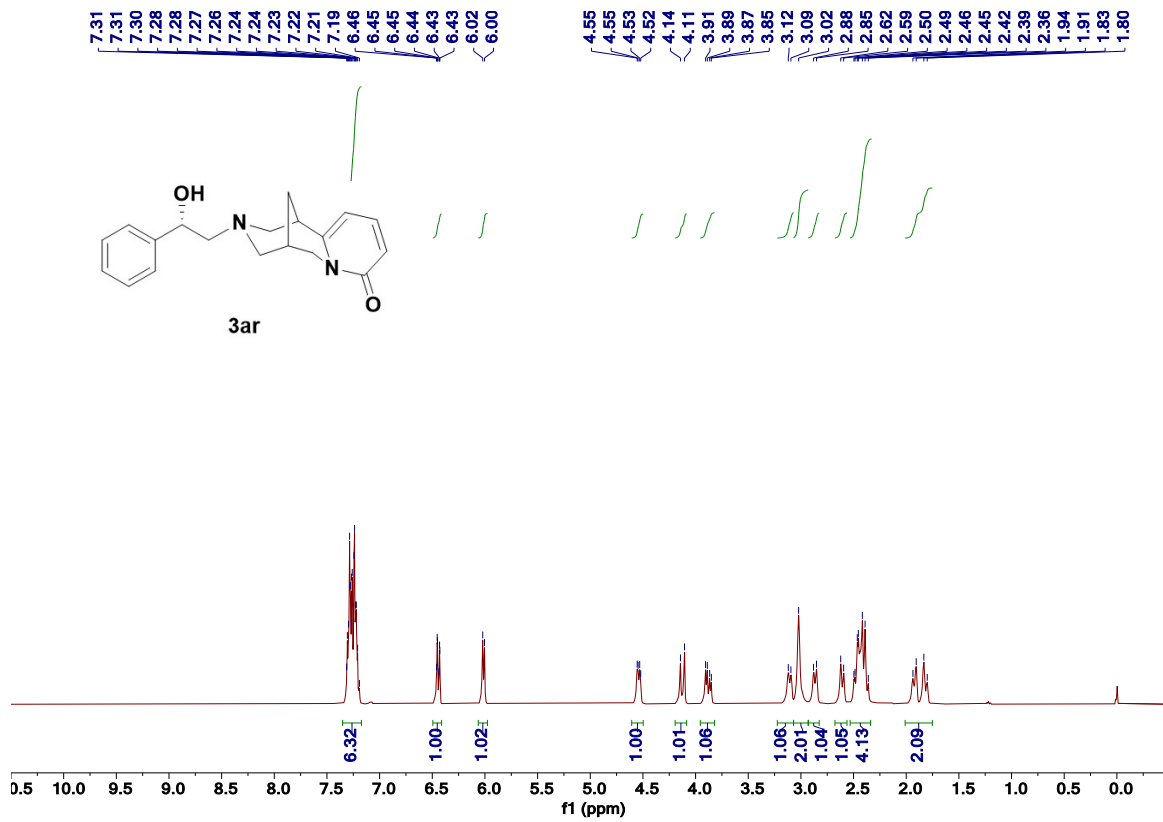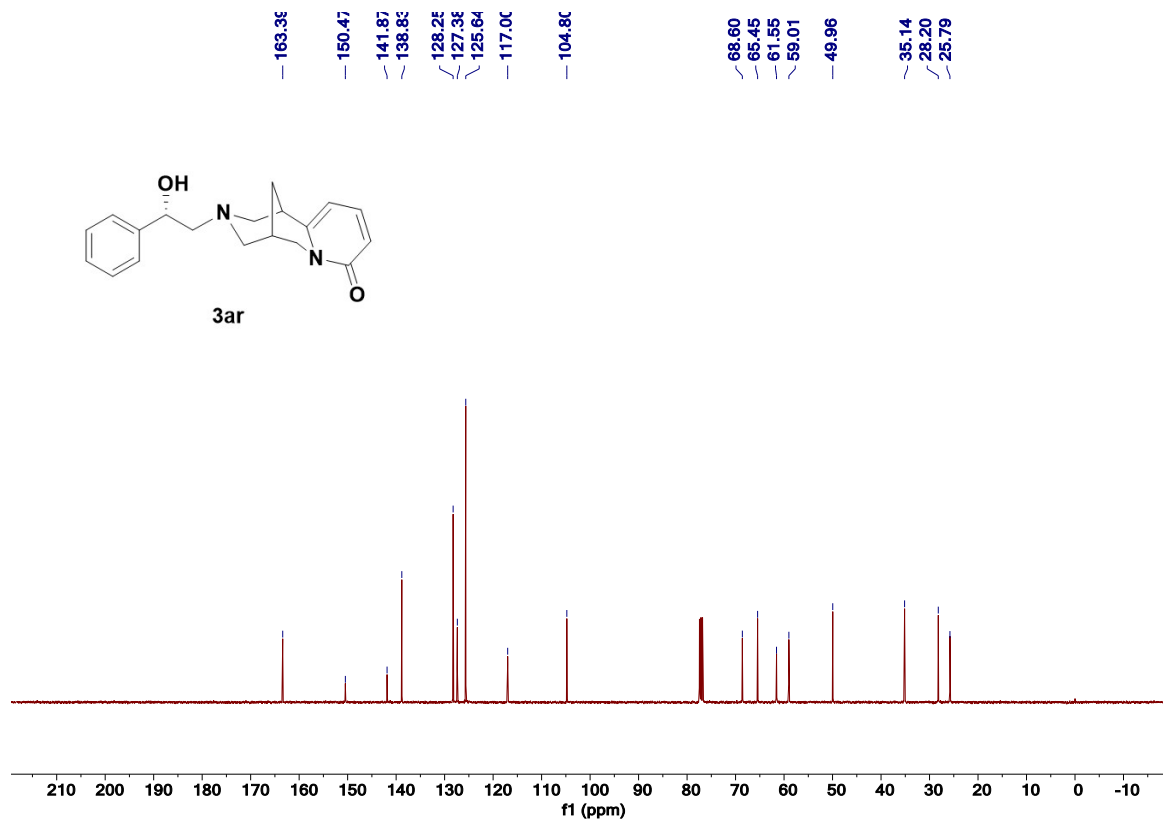

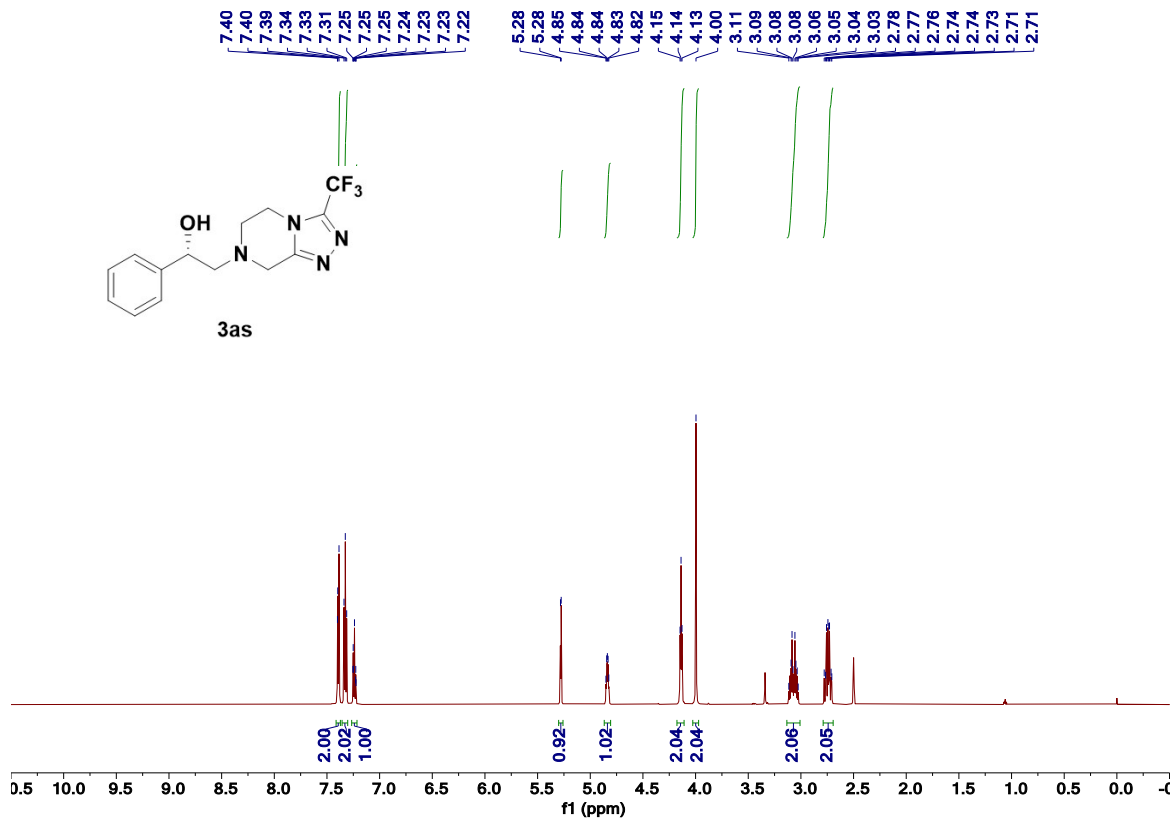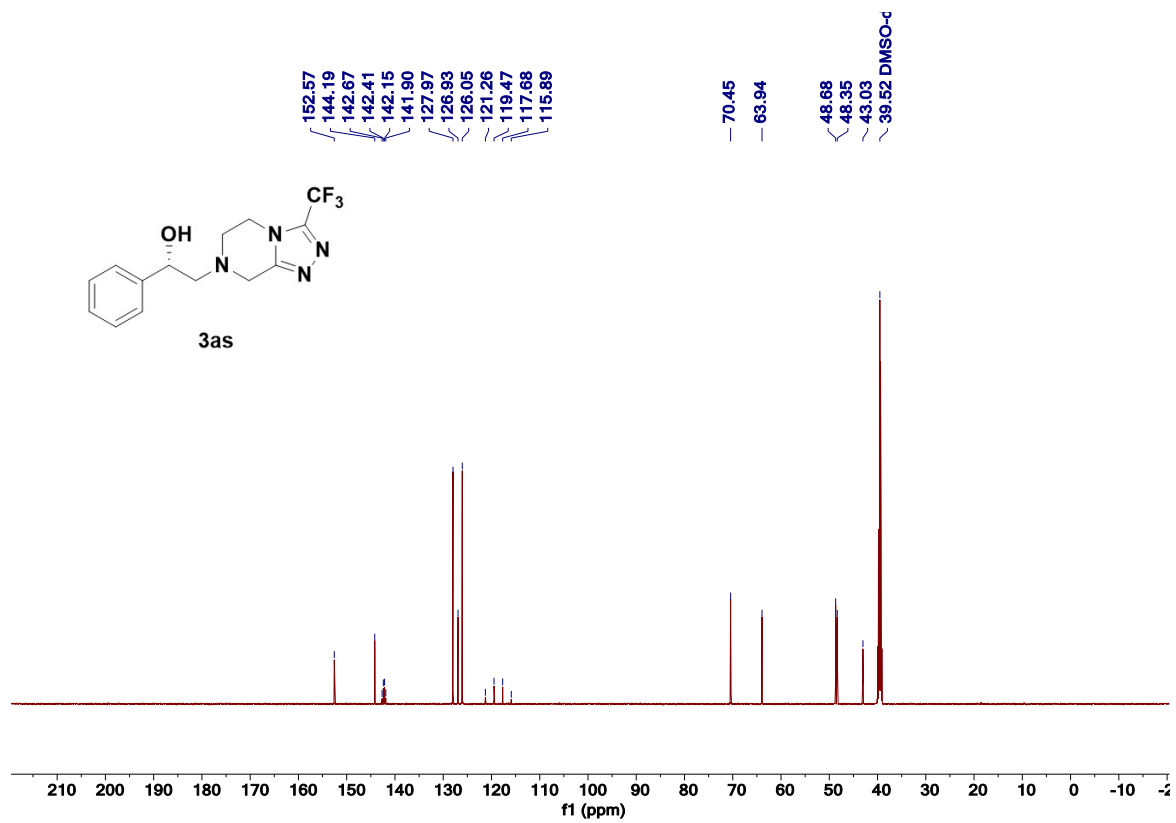

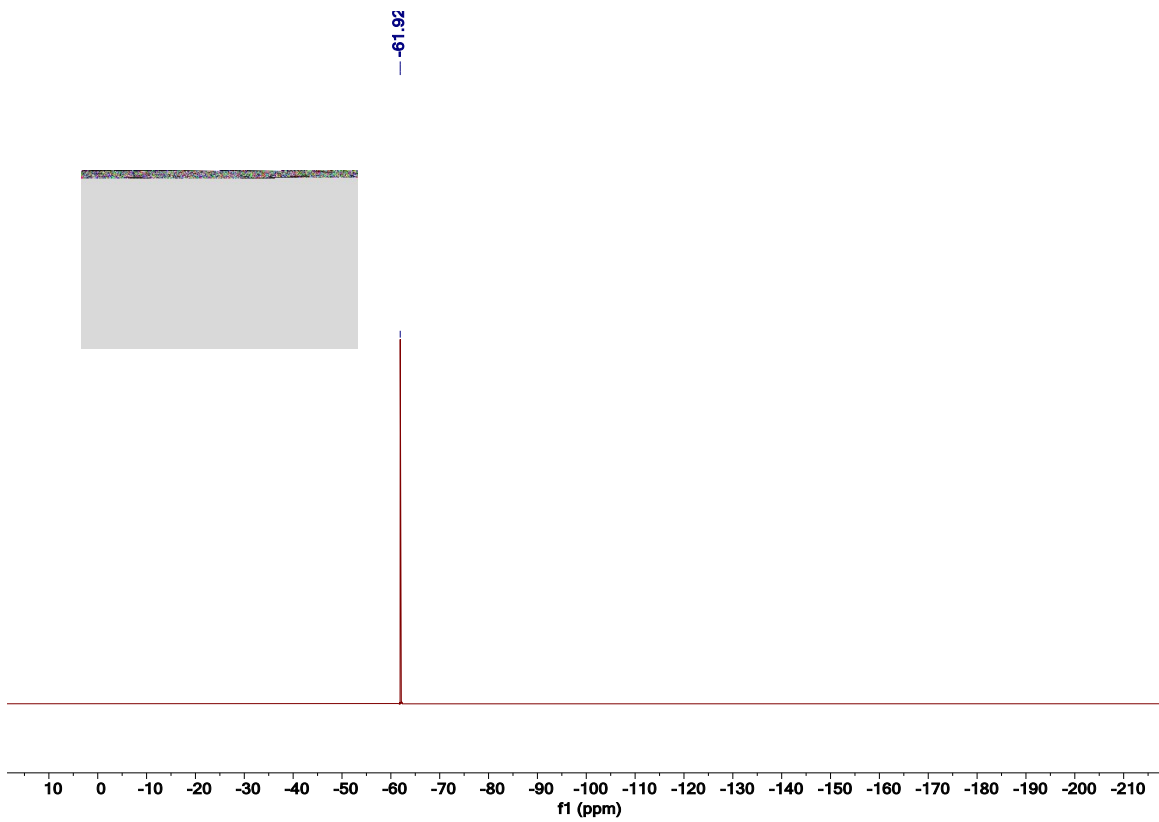

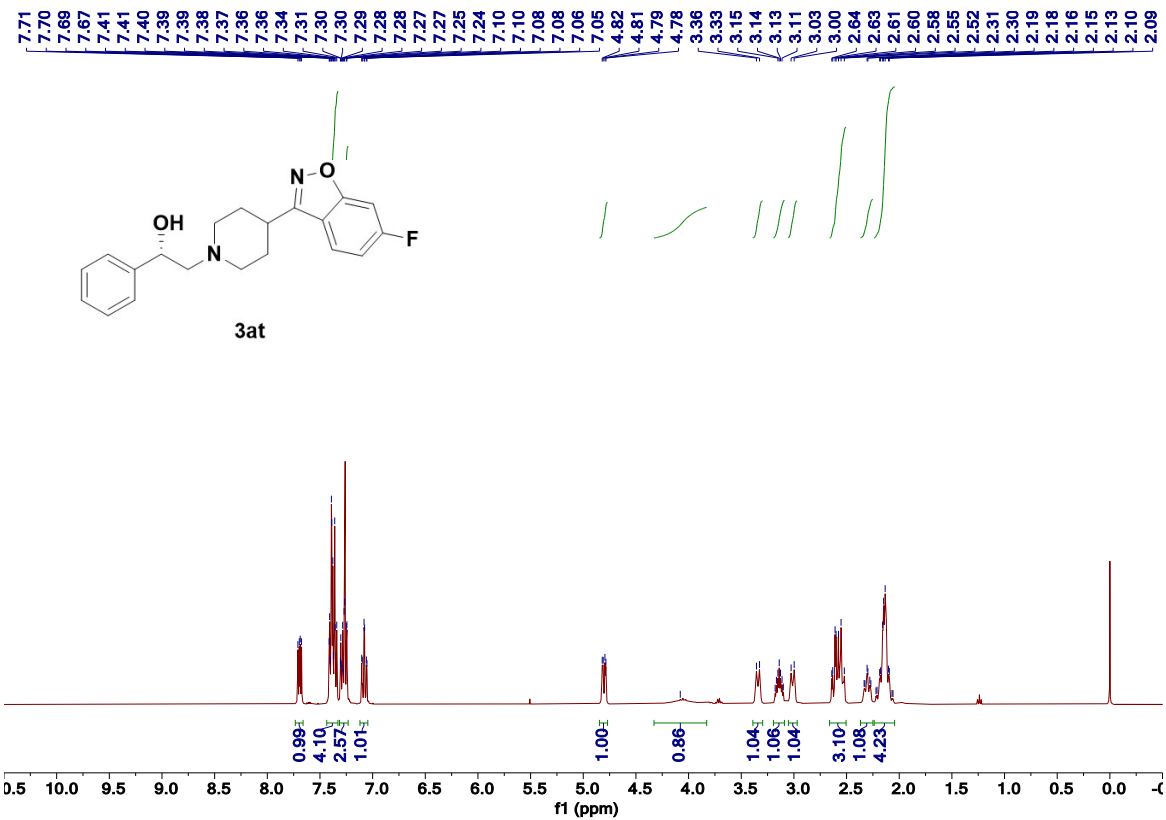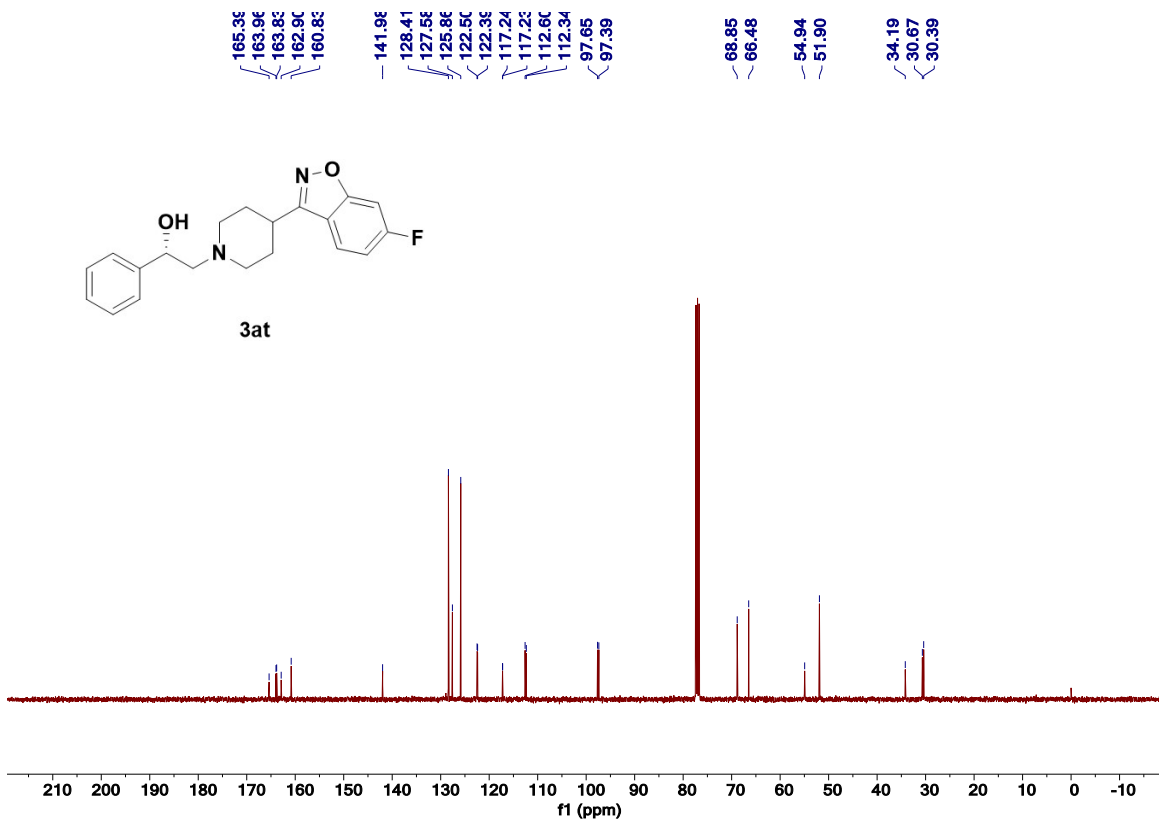

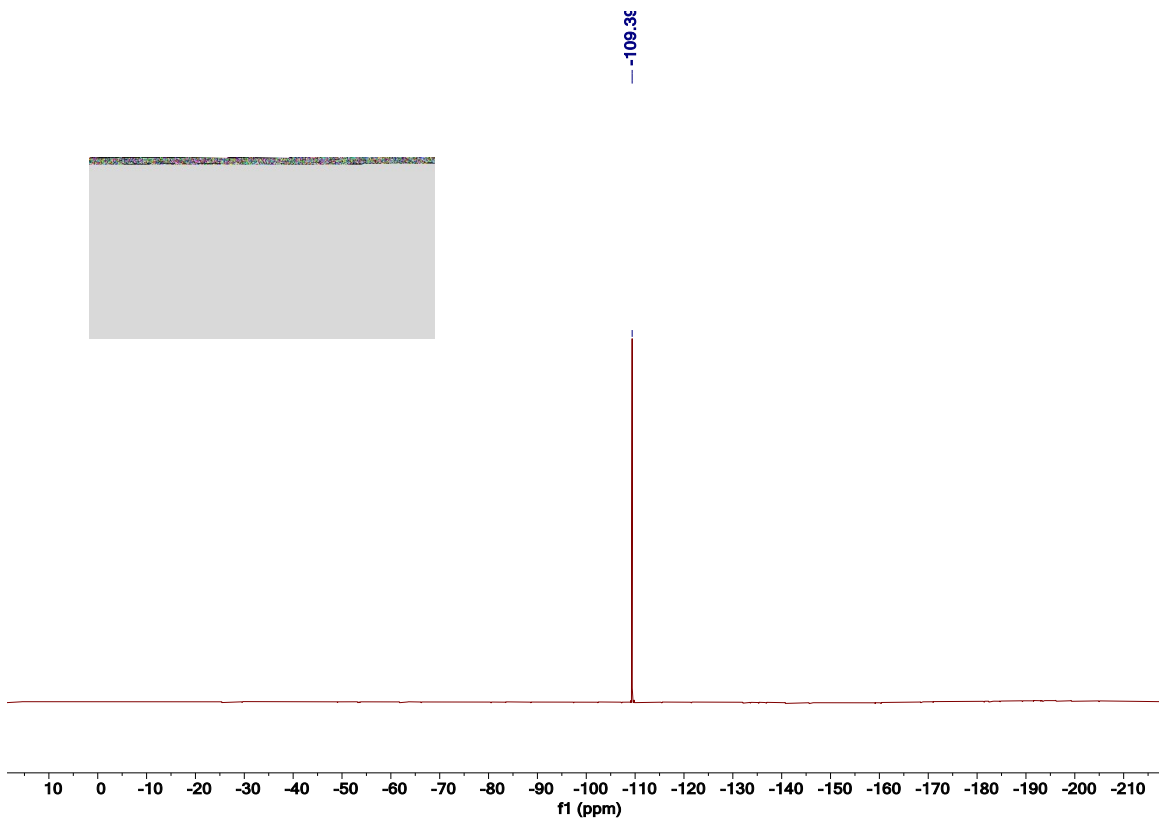

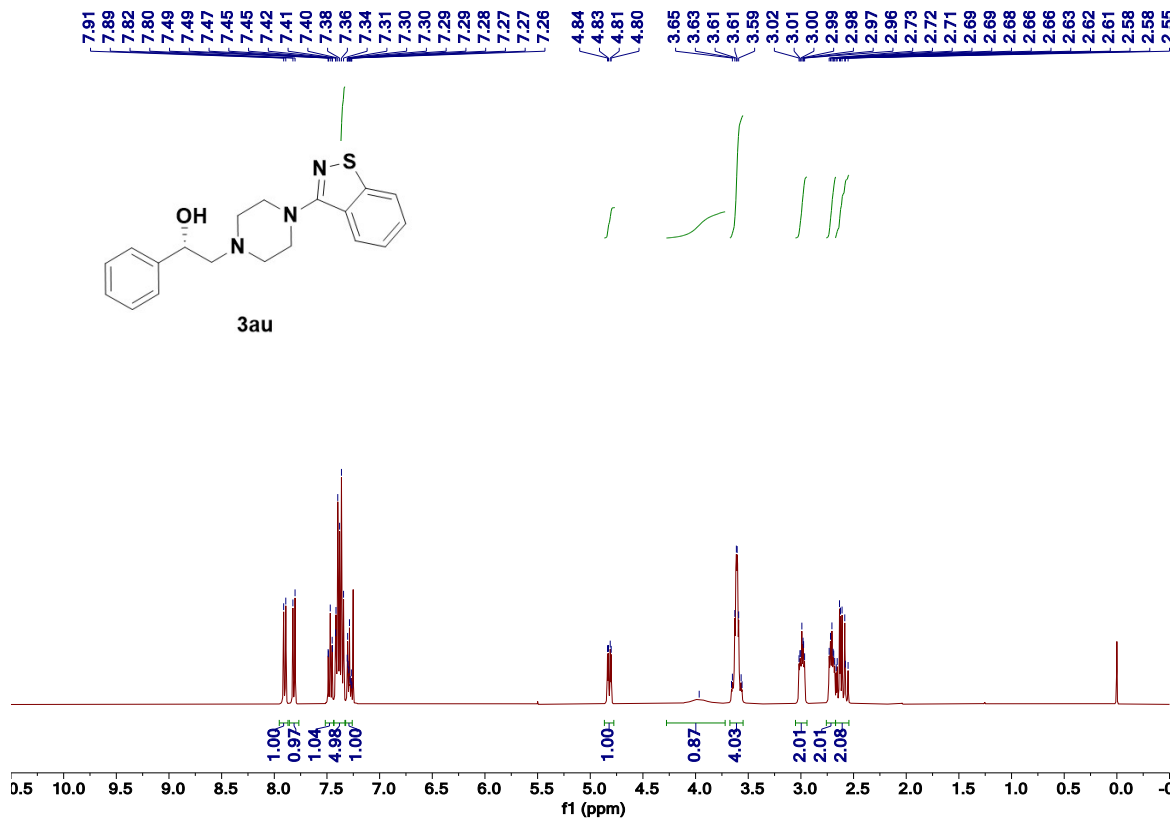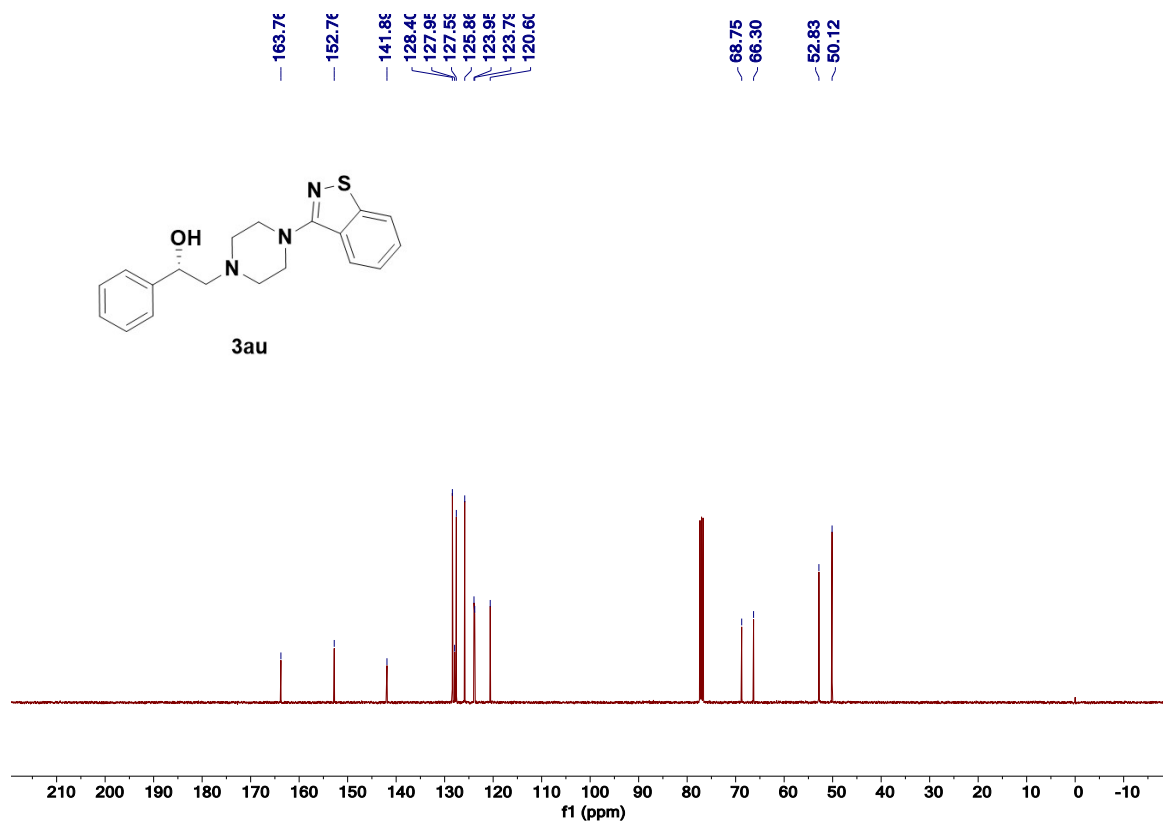



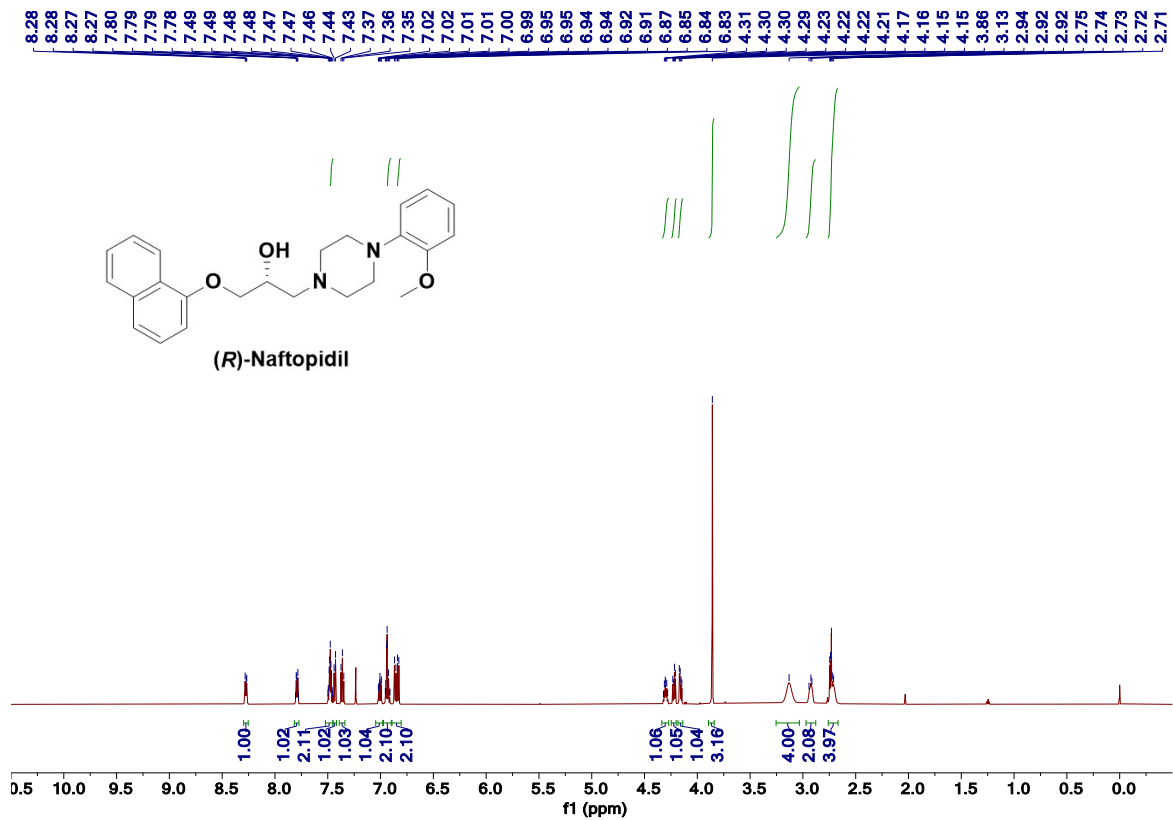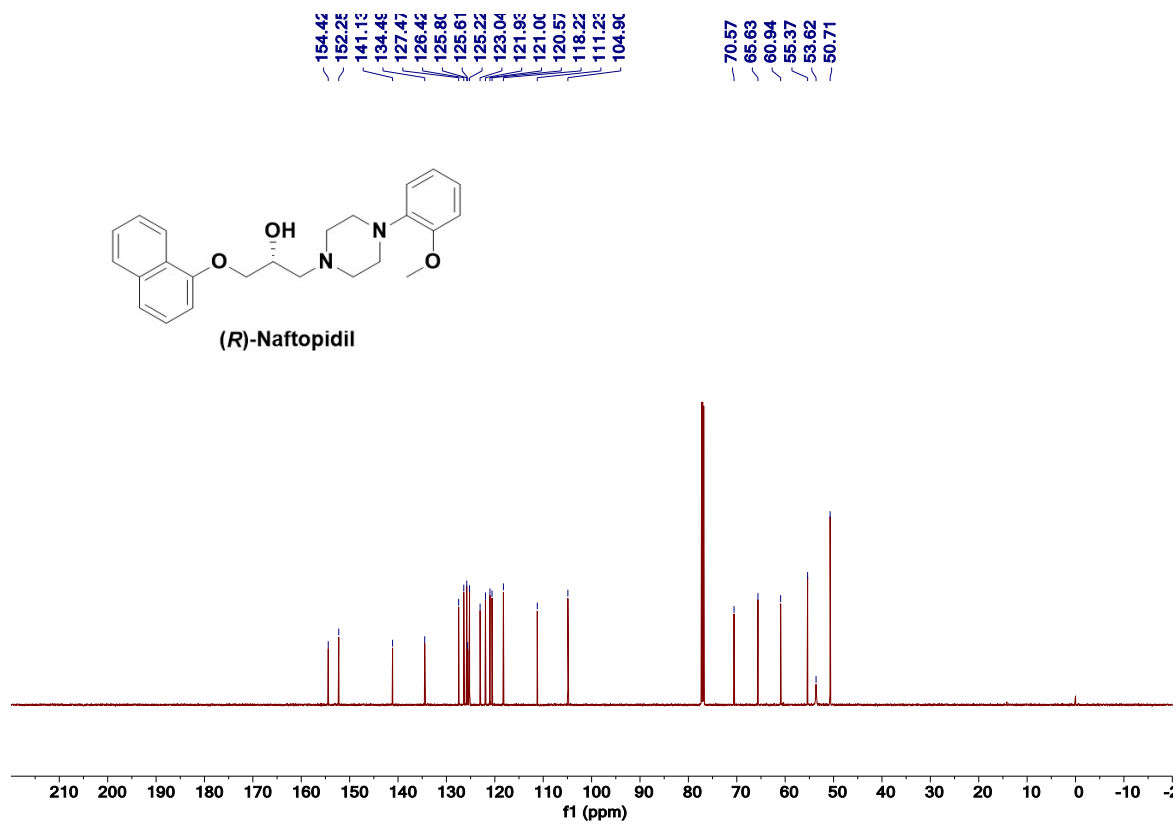

## 8. HPLC charts of the products

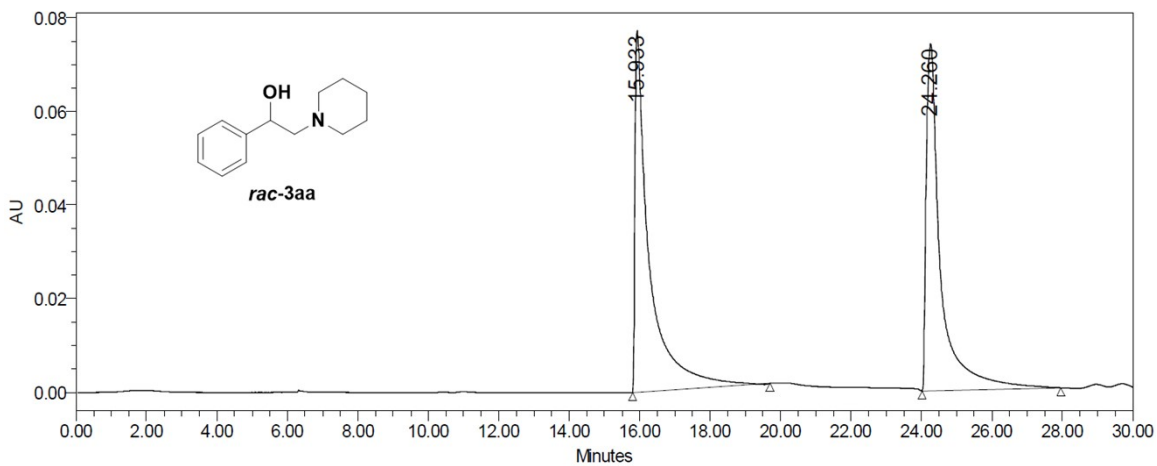

Channel: W2489 ChA; Processed Channel: W2489 ChA 254nm; Result Id: 1399; Processing Method: Default

| Peak# | Ret. Time | Area    | Height | Area % |
|-------|-----------|---------|--------|--------|
| 1     | 15.933    | 2191115 | 77116  | 50.93  |
| 2     | 24.260    | 2110704 | 73983  | 49.07  |

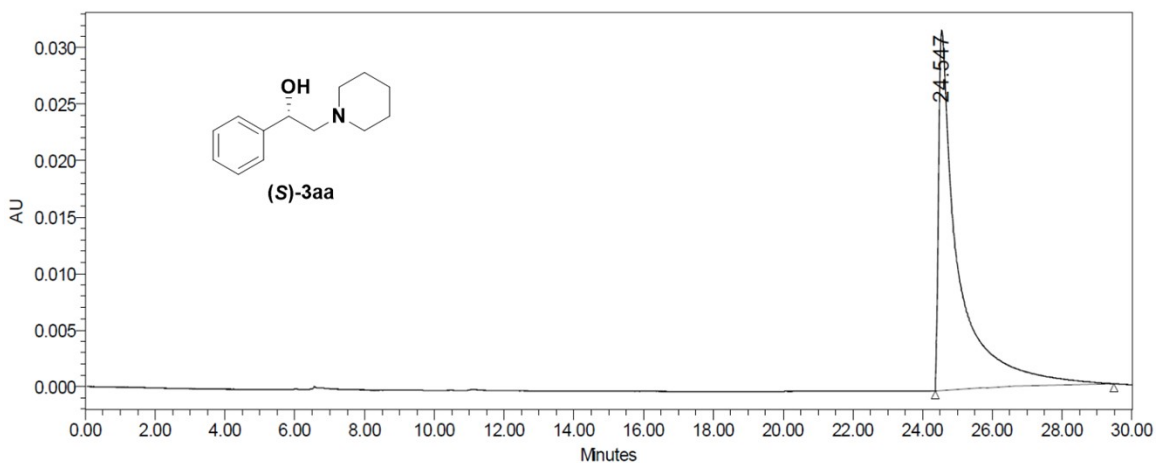

Channel: W2489 ChA; Processed Channel: W2489 ChA 254nm; Result Id: 1401; Processing Method: Default

| Peak# | Ret. Time | Area    | Height | Area % |
|-------|-----------|---------|--------|--------|
| 1     | /         | /       | /      | /      |
| 2     | 24.547    | 1241599 | 31656  | 100.00 |

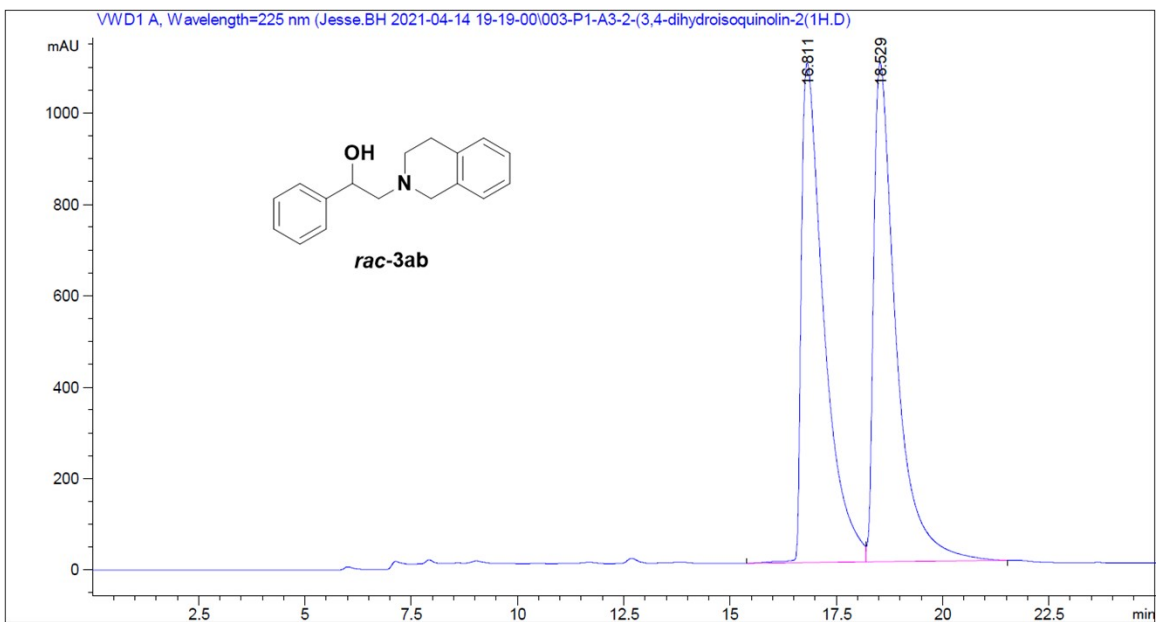

| Peak# | Ret. Time | Area     | Height  | Area % |
|-------|-----------|----------|---------|--------|
| 1     | 16.811    | 40343325 | 1094313 | 50.19  |
| 2     | 18.529    | 40042264 | 1092448 | 49.81  |

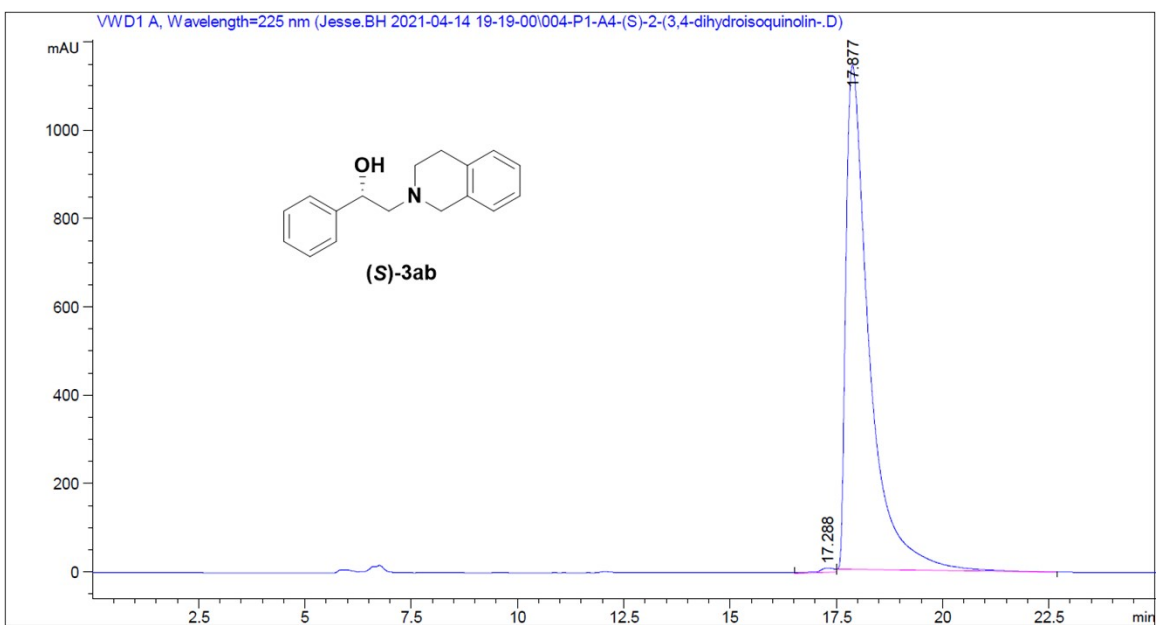

| Peak# | Ret. Time | Area     | Height  | Area % |
|-------|-----------|----------|---------|--------|
| 1     | 17.288    | 246823   | 9379    | 0.57   |
| 2     | 17.877    | 43381238 | 1143067 | 99.43  |

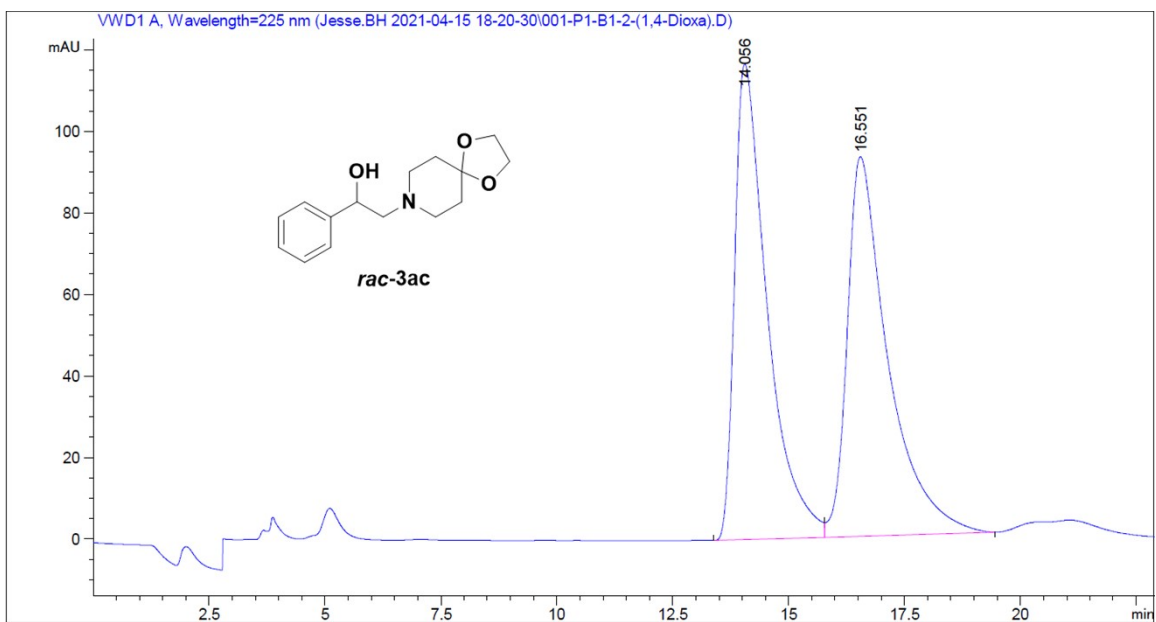

| Peak# | Ret. Time | Area    | Height | Area % |
|-------|-----------|---------|--------|--------|
| 1     | 14.056    | 5695201 | 116730 | 50.02  |
| 2     | 16.551    | 5691900 | 93104  | 49.98  |

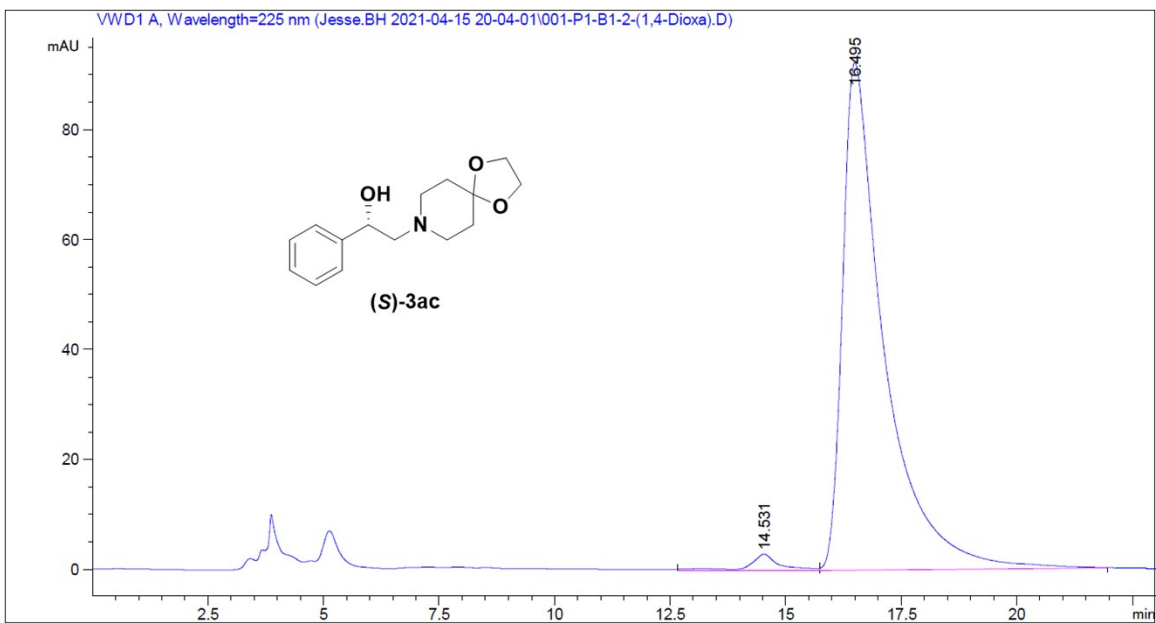

| Peak# | Ret. Time | Area    | Height | Area % |
|-------|-----------|---------|--------|--------|
| 1     | 14.531    | 141120  | 2983   | 2.37   |
| 2     | 16.495    | 5810070 | 92313  | 97.63  |

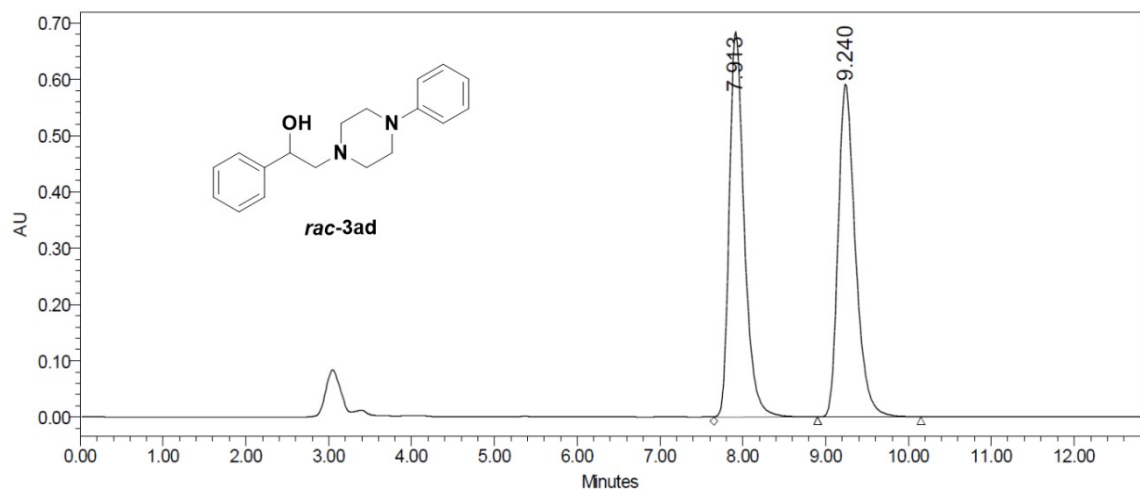

Channel: W2489 ChA; Processed Channel: W2489 ChA 225nm; Result Id: 1843; Processing Method: 1

| Peak# | Ret. Time | Area    | Height | Area % |
|-------|-----------|---------|--------|--------|
| 1     | 7.913     | 8599325 | 685200 | 50.12  |
| 2     | 9.240     | 8559744 | 592439 | 49.88  |

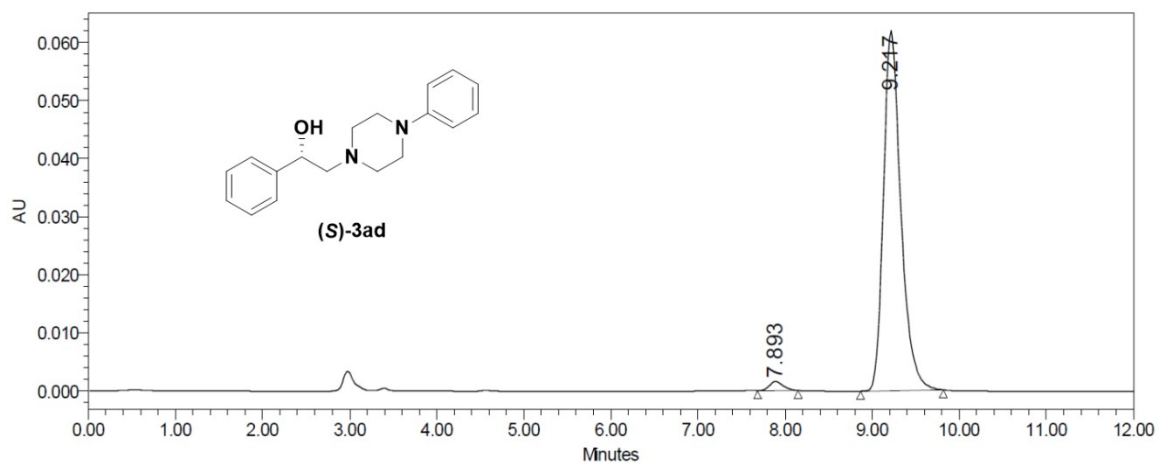

Channel: W2489 ChA; Processed Channel: W2489 ChA 225nm; Result Id: 1845; Processing Method: 12

| Peak# | Ret. Time | Area   | Height | Area % |
|-------|-----------|--------|--------|--------|
| 1     | 7.893     | 16963  | 1541   | 1.93   |
| 2     | 9.217     | 861706 | 61915  | 98.07  |

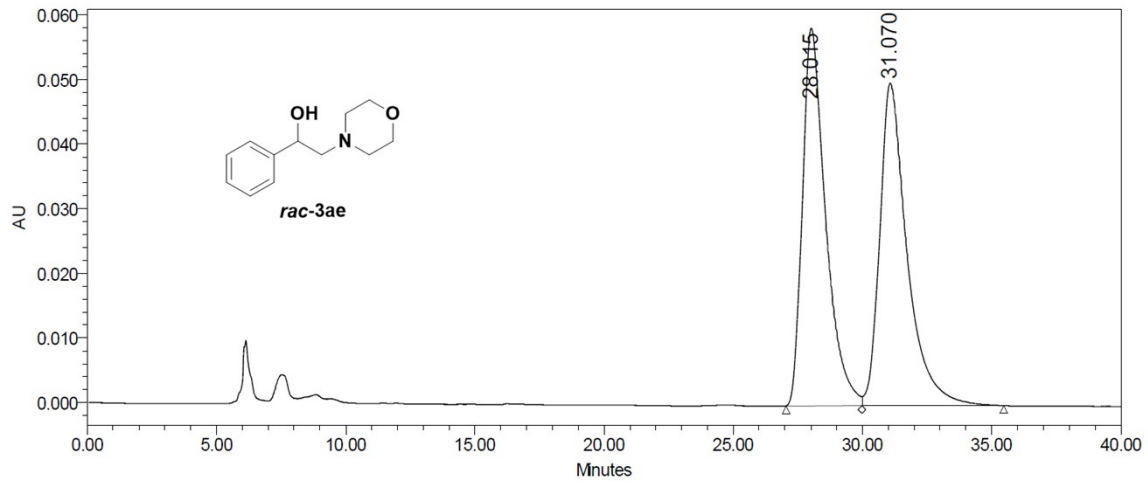

Channel: W2489 ChA; Processed Channel: W2489 ChA 225nm; Result Id: 1487; Processing Method: 2

| Peak# | Ret. Time | Area    | Height | Area % |
|-------|-----------|---------|--------|--------|
| 1     | 28.015    | 3620783 | 58443  | 49.58  |
| 2     | 31.070    | 3682646 | 49911  | 50.42  |

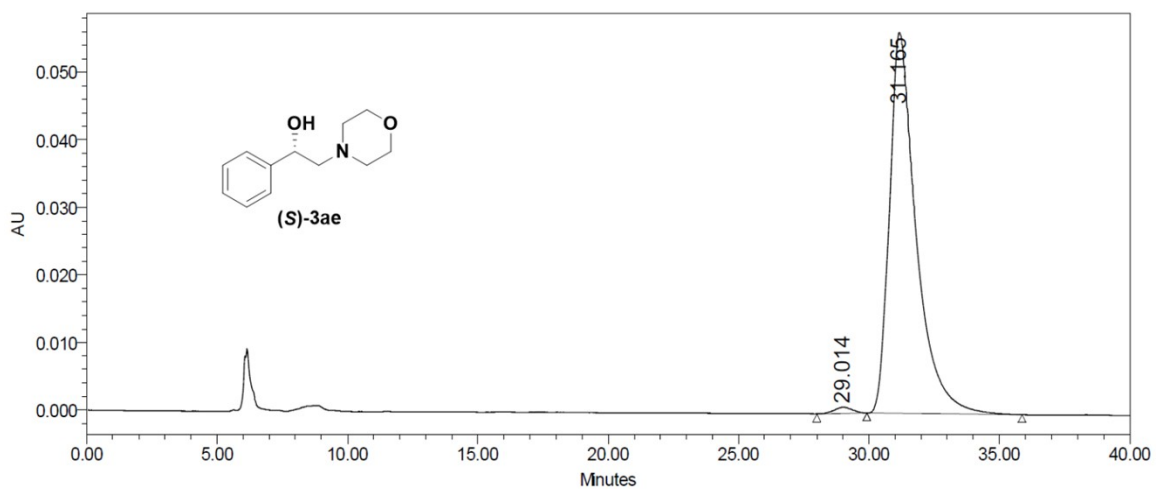

Channel: W2489 ChA; Processed Channel: W2489 ChA 225nm; Result Id: 1495; Processing Method: 2

| Peak# | Ret. Time | Area    | Height | Area % |
|-------|-----------|---------|--------|--------|
| 1     | 29.014    | 44408   | 922    | 1.09   |
| 2     | 31.165    | 4035979 | 56405  | 98.91  |

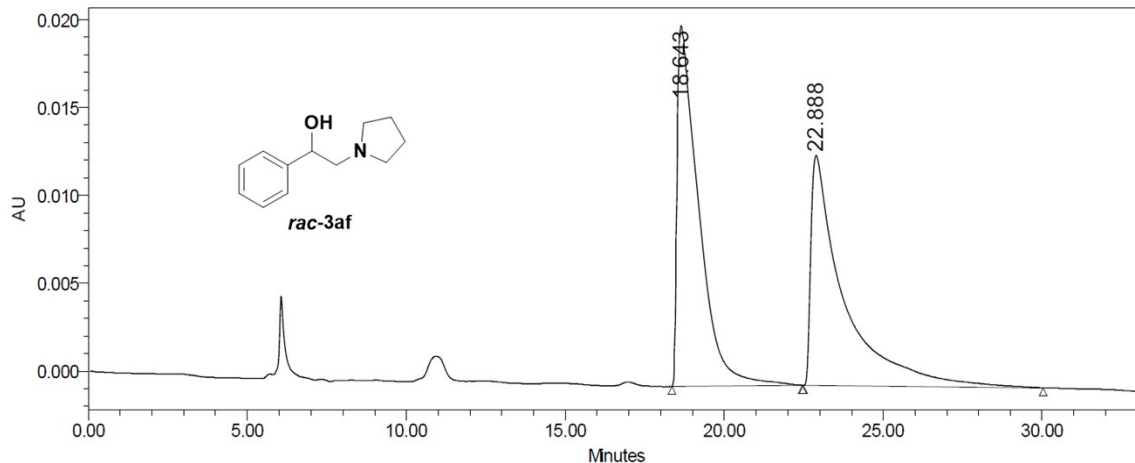

Channel: W2489 ChB; Processed Channel: W2489 ChB 230nm; Result Id: 1638; Processing Method: 12

| Peak# | Ret. Time | Area   | Height | Area % |
|-------|-----------|--------|--------|--------|
| 1     | 18.643    | 970929 | 20524  | 50.88  |
| 2     | 22.888    | 937321 | 13076  | 49.12  |

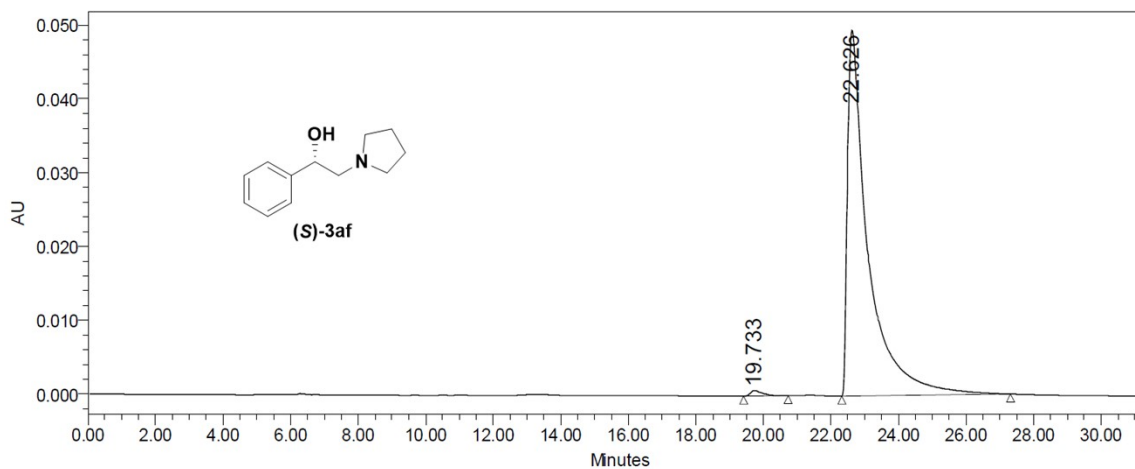

Channel: W2489 ChA; Processed Channel: W2489 ChA 230nm; Result Id: 1654; Processing Method: 122

| Peak# | Ret. Time | Area    | Height | Area % |
|-------|-----------|---------|--------|--------|
| 1     | 19.733    | 18415   | 727    | 0.87   |
| 2     | 22.626    | 2094398 | 49599  | 99.13  |

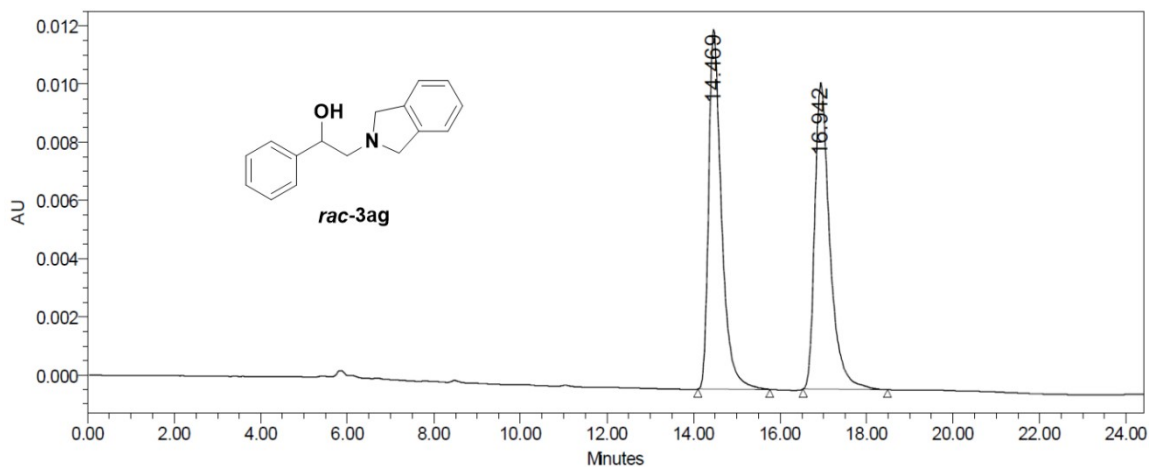

Channel: W2489 ChA; Processed Channel: W2489 ChA 254nm; Result Id: 1725; Processing Method: RAC

| Peak# | Ret. Time | Area   | Height | Area % |
|-------|-----------|--------|--------|--------|
| 1     | 14.469    | 255855 | 12354  | 50.06  |
| 2     | 16.942    | 255219 | 10536  | 49.94  |

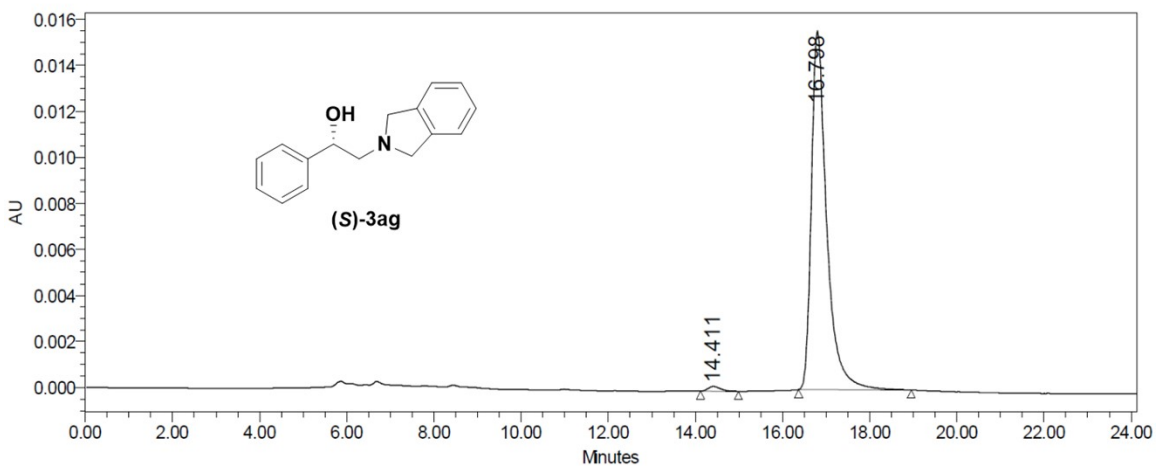

Channel: W2489 ChA; Processed Channel: W2489 ChA 254nm; Result Id: 1733; Processing Method: 11111

| Peak# | Ret. Time | Area   | Height | Area % |
|-------|-----------|--------|--------|--------|
| 1     | 14.411    | 4073   | 210    | 1.06   |
| 2     | 16.798    | 380010 | 15587  | 98.94  |



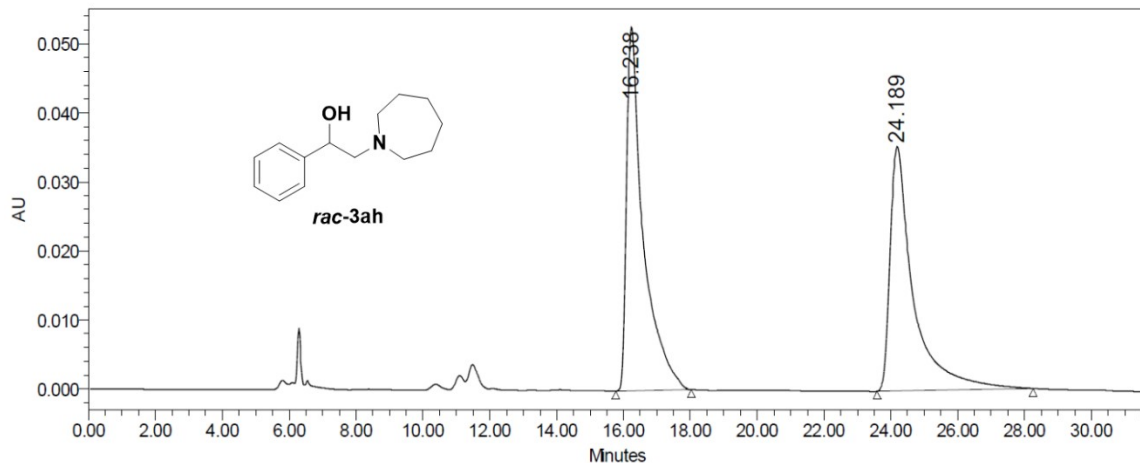

Channel: W2489 ChA; Processed Channel: W2489 ChA 230nm; Result Id: 1677; Processing Method: 1222

| Peak# | Ret. Time | Area    | Height | Area % |
|-------|-----------|---------|--------|--------|
| 1     | 16.238    | 1745839 | 52697  | 50.43  |
| 2     | 24.189    | 1716067 | 35413  | 49.57  |

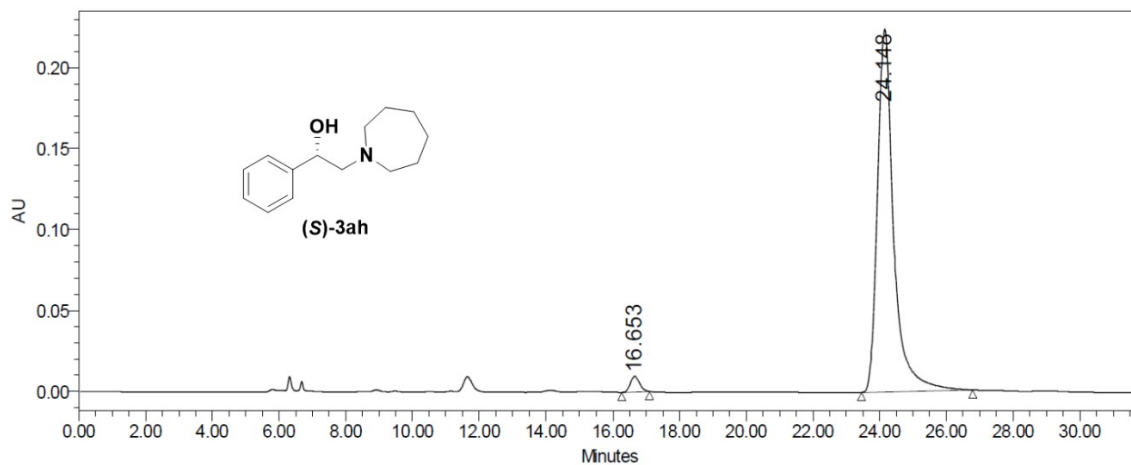

Channel: W2489 ChA; Processed Channel: W2489 ChA 230nm; Result Id: 1695; Processing Method: 1111

| Peak# | Ret. Time | Area    | Height | Area % |
|-------|-----------|---------|--------|--------|
| 1     | 16.653    | 183741  | 9676   | 2.37   |
| 2     | 24.148    | 7575695 | 224152 | 97.63  |

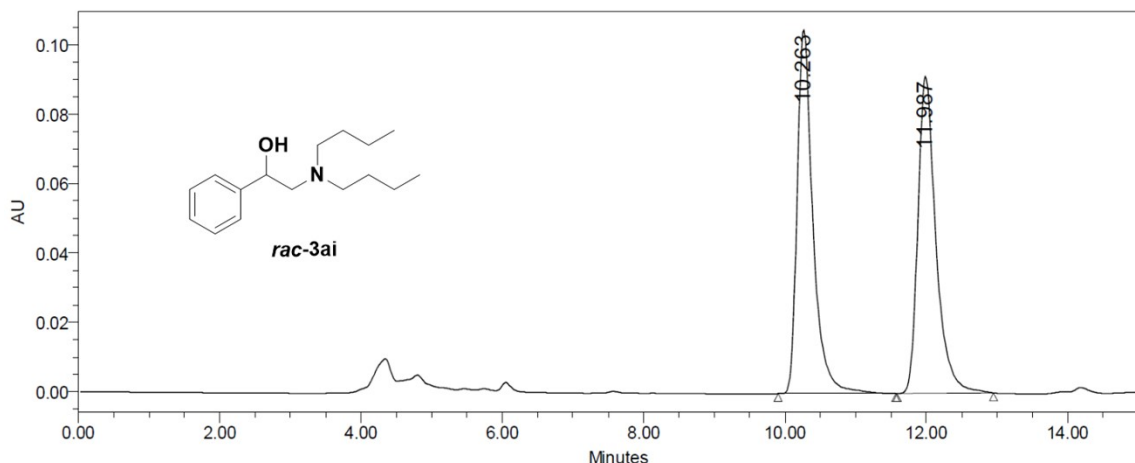

Channel: W2489 ChA; Processed Channel: W2489 ChA 225nm; Result Id: 1794; Processing Method: 12

| Peak# | Ret. Time | Area    | Height | Area % |
|-------|-----------|---------|--------|--------|
| 1     | 10.263    | 1632234 | 104873 | 50.14  |
| 2     | 11.987    | 1623392 | 91479  | 49.86  |

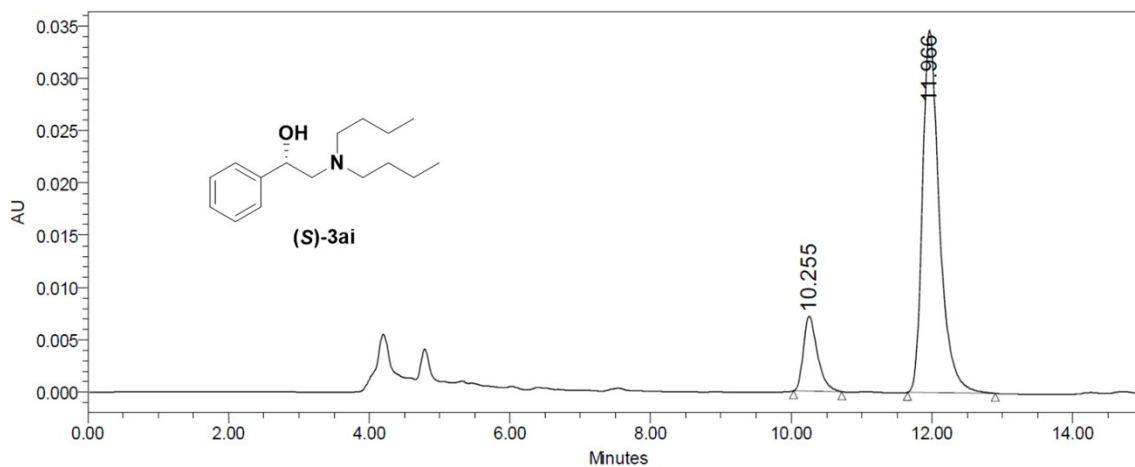

Channel: W2489 ChA; Processed Channel: W2489 ChA 225nm; Result Id: 1802; Processing Method: 12

| Peak# | Ret. Time | Area   | Height | Area % |
|-------|-----------|--------|--------|--------|
| 1     | 10.255    | 99357  | 7184   | 14.63  |
| 2     | 11.966    | 579942 | 34635  | 85.37  |

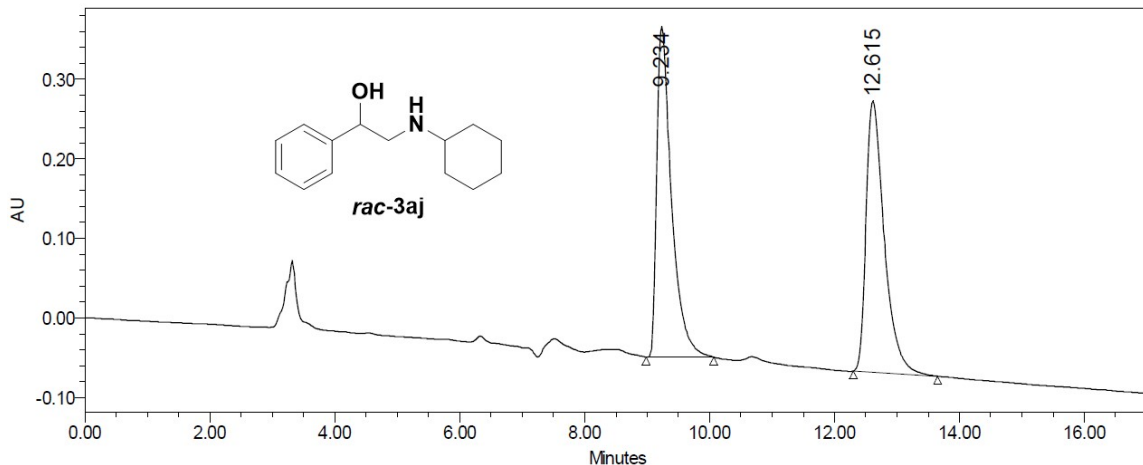

Channel: W2489 ChB; Processed Channel: W2489 ChB 210nm; Result Id: 3012; Processing Method: HEXNH

| Peak# | Ret. Time | Area    | Height | Area % |
|-------|-----------|---------|--------|--------|
| 1     | 9.234     | 6781615 | 415262 | 49.64  |
| 2     | 12.615    | 6880494 | 341178 | 50.36  |

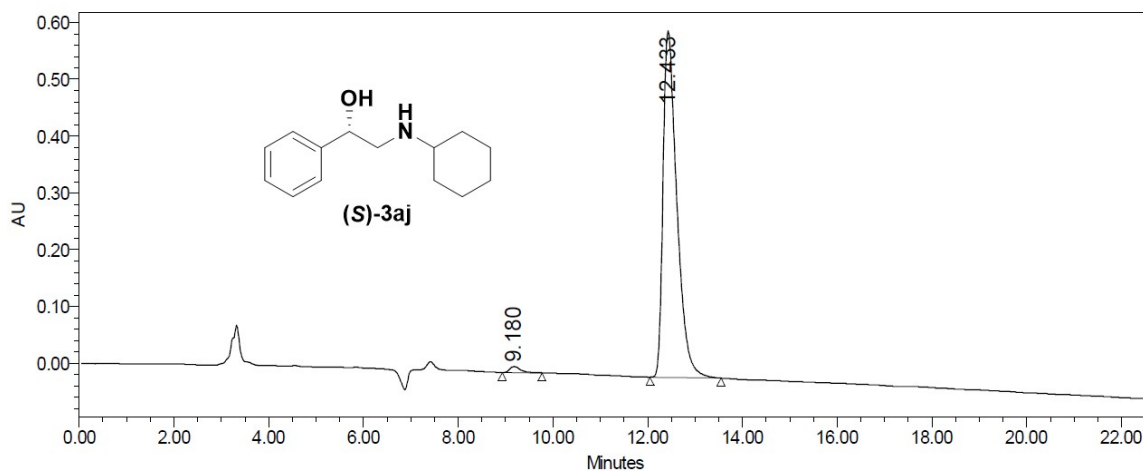

Channel: W2489 ChB; Processed Channel: W2489 ChB 210nm; Result Id: 3014; Processing Method: HEXNH

| Peak# | Ret. Time | Area     | Height | Area % |
|-------|-----------|----------|--------|--------|
| 1     | 9.180     | 172508   | 10658  | 1.37   |
| 2     | 12.433    | 12398046 | 609903 | 98.63  |

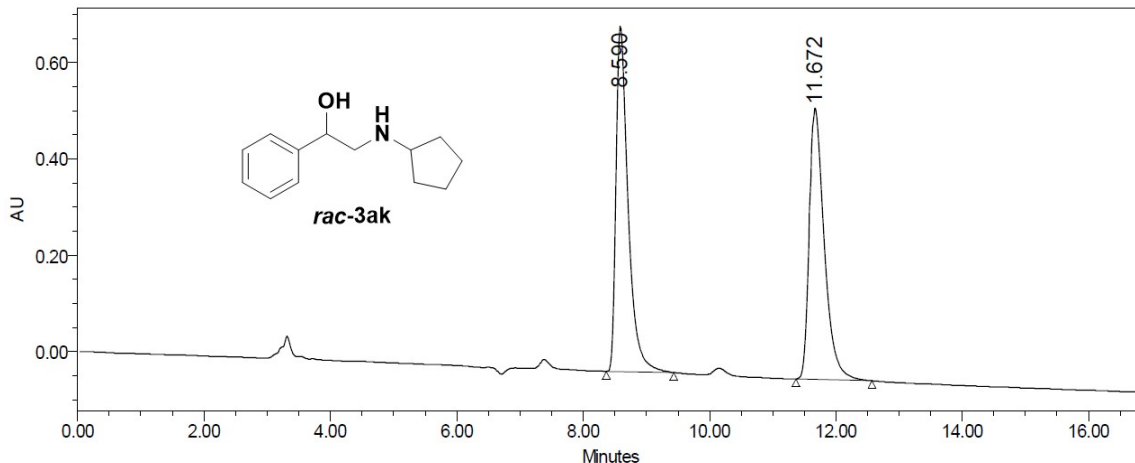

Channel: W2489 ChB; Processed Channel: W2489 ChB 210nm; Result Id: 3069; Processing Method: pent

| Peak# | Ret. Time | Area    | Height | Area % |
|-------|-----------|---------|--------|--------|
| 1     | 8.590     | 9399922 | 718776 | 49.97  |
| 2     | 11.672    | 9412793 | 563787 | 50.03  |

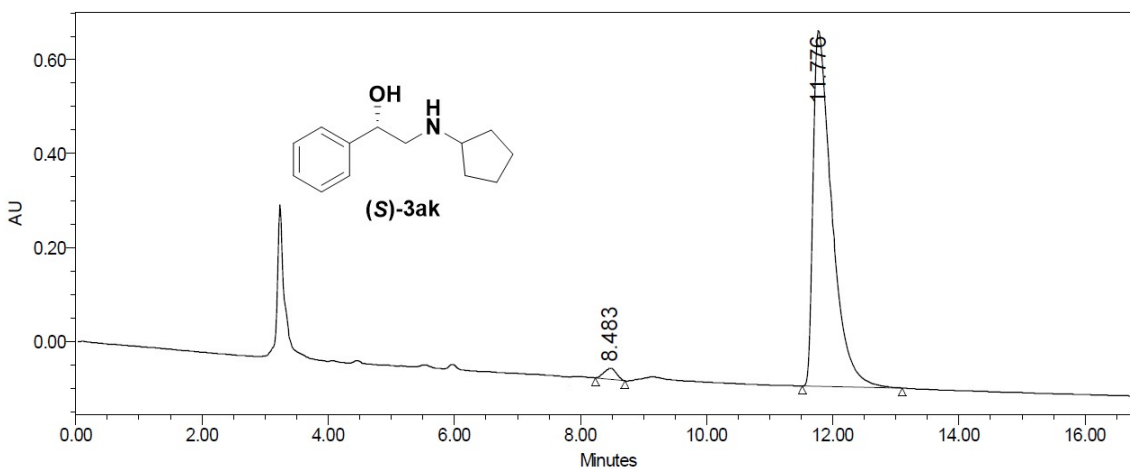

Channel: W2489 ChA; Processed Channel: W2489 ChA 210nm; Result Id: 3084; Processing Method: pent

| Peak# | Ret. Time | Area     | Height | Area % |
|-------|-----------|----------|--------|--------|
| 1     | 8.483     | 324114   | 23991  | 2.04   |
| 2     | 11.776    | 15585993 | 759857 | 97.96  |

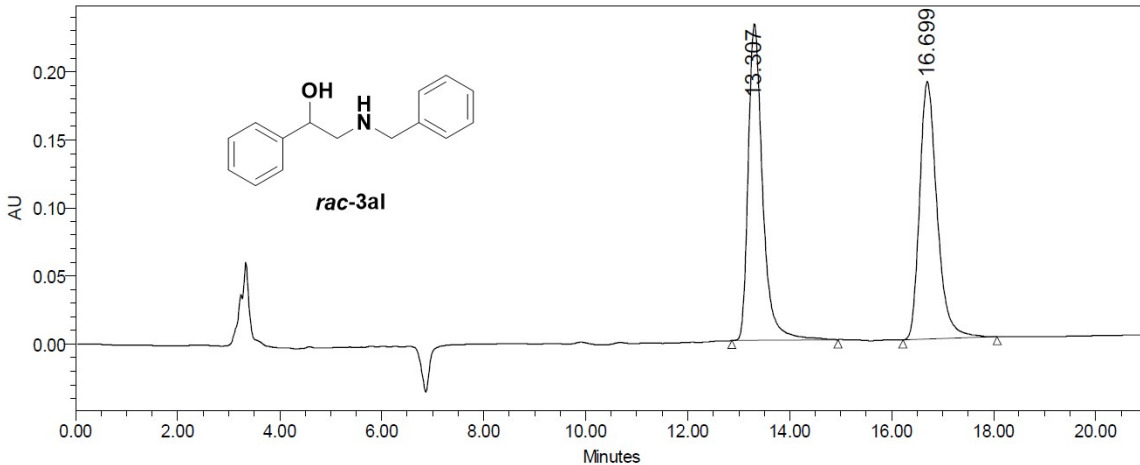

Channel: W2489 ChA; Processed Channel: W2489 ChA 210nm; Result Id: 3216; Processing Method: RAC

| Peak# | Ret. Time | Area    | Height | Area % |
|-------|-----------|---------|--------|--------|
| 1     | 13.307    | 4555751 | 232631 | 50.25  |
| 2     | 16.699    | 4509557 | 189124 | 49.75  |

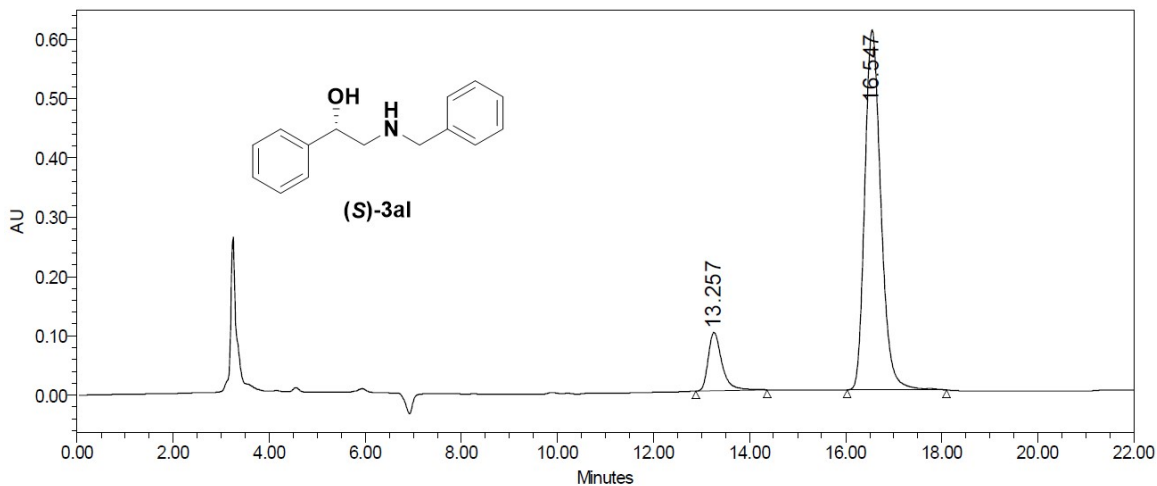

Channel: W2489 ChA; Processed Channel: W2489 ChA 210nm; Result Id: 3214; Processing Method: S

| Peak# | Ret. Time | Area     | Height | Area % |
|-------|-----------|----------|--------|--------|
| 1     | 13.257    | 1949819  | 98422  | 12.12  |
| 2     | 16.547    | 14143942 | 607802 | 87.88  |

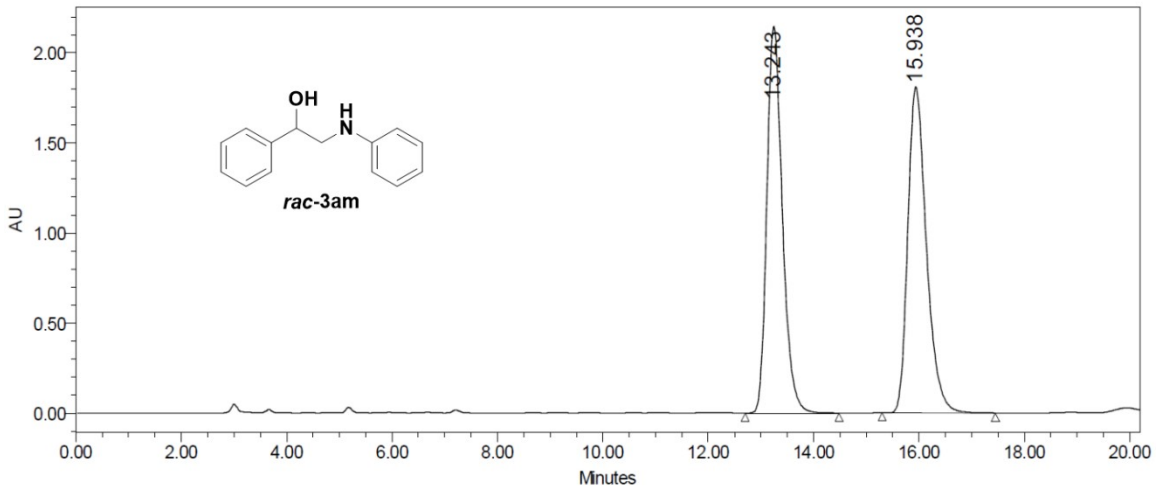

| Peak# | Ret. Time | Area     | Height  | Area % |
|-------|-----------|----------|---------|--------|
| 1     | 13.243    | 43889641 | 2149111 | 49.67  |
| 2     | 15.938    | 44471319 | 1812974 | 50.33  |

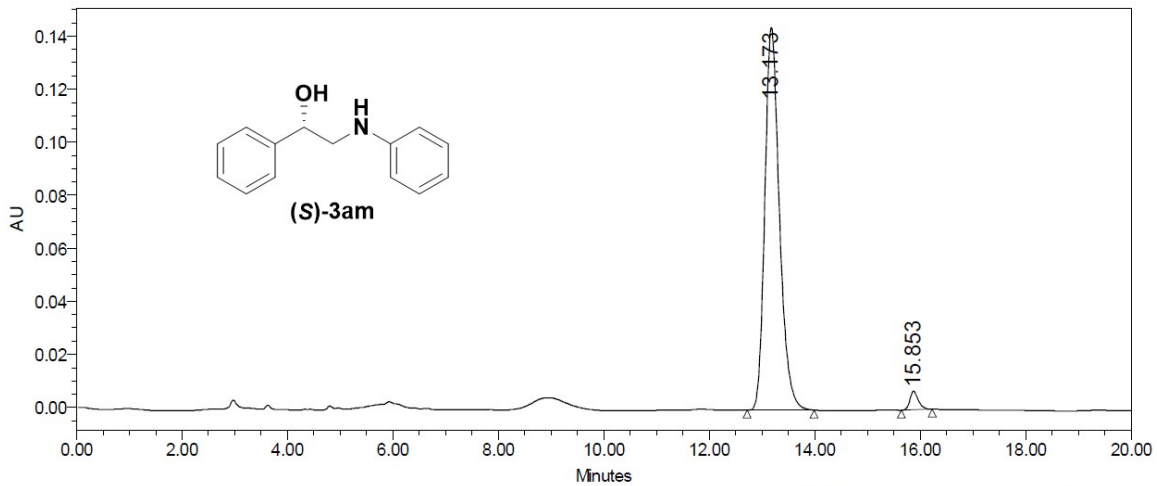

| Peak# | Ret. Time | Area    | Height | Area % |
|-------|-----------|---------|--------|--------|
| 1     | 13.173    | 2775256 | 144530 | 97.25  |
| 2     | 15.853    | 78347   | 7034   | 2.75   |

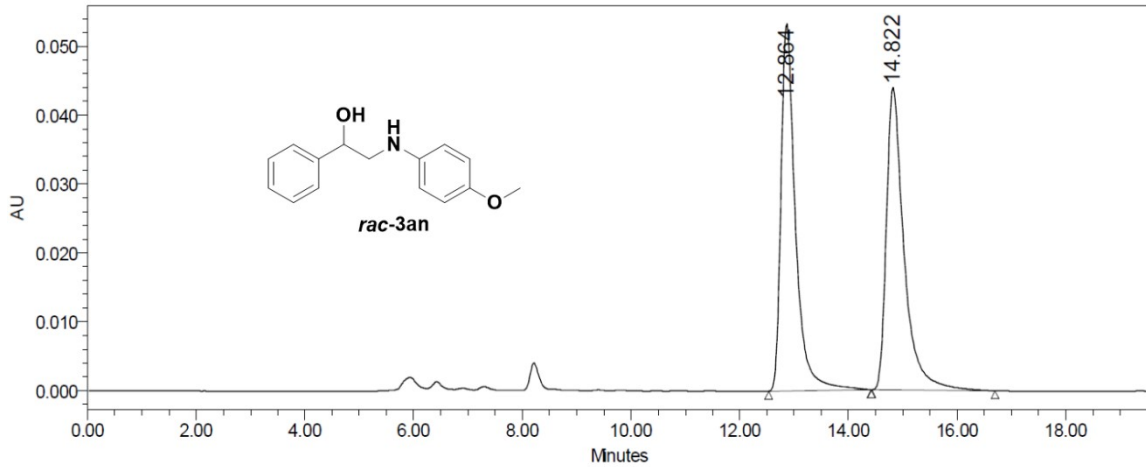

Channel: W2489 ChA; Processed Channel: W2489 ChA 254nm; Result Id: 2156; Processing Method: RAC

| Peak# | Ret. Time | Area   | Height | Area % |
|-------|-----------|--------|--------|--------|
| 1     | 12.864    | 988622 | 53293  | 50.02  |
| 2     | 14.822    | 987841 | 43949  | 49.98  |

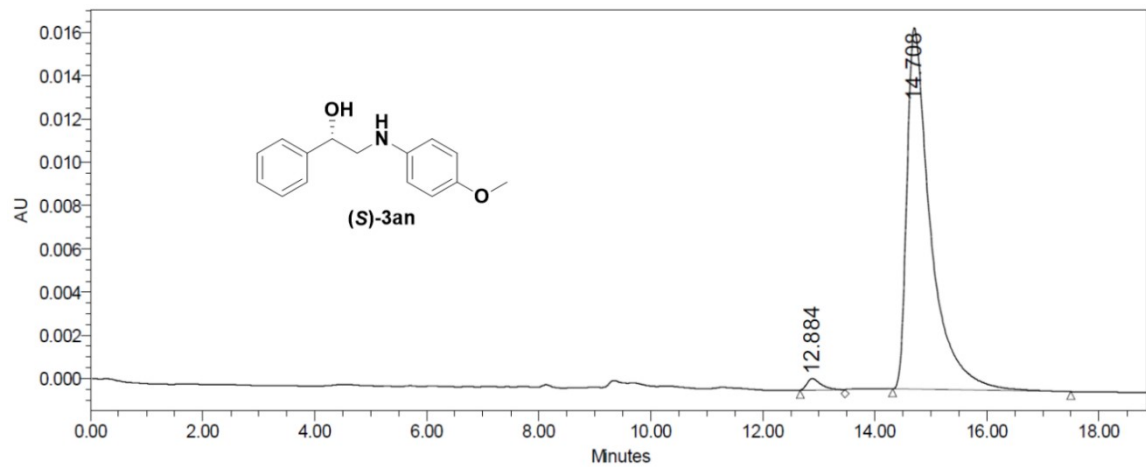

Channel: W2489 ChB; Processed Channel: W2489 ChB 254nm; Result Id: 2158; Processing Method:

| Peak# | Ret. Time | Area   | Height | Area % |
|-------|-----------|--------|--------|--------|
| 1     | 12.884    | 9249   | 537    | 1.85   |
| 2     | 14.708    | 490747 | 16718  | 98.15  |

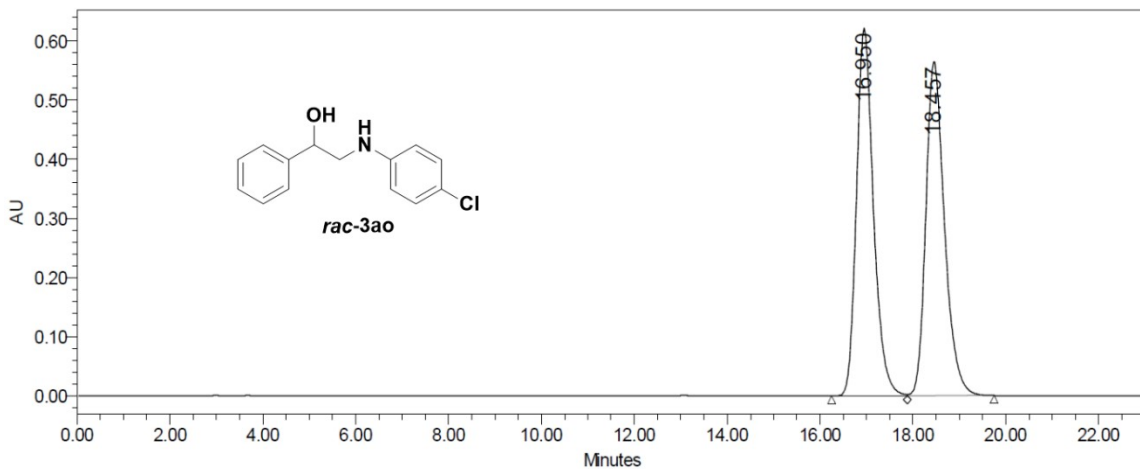

Channel: W2489 ChA; Processed Channel: W2489 ChA 254nm; Result Id: 2184; Processing Method: 1212

| Peak# | Ret. Time | Area     | Height | Area % |
|-------|-----------|----------|--------|--------|
| 1     | 16.950    | 15791178 | 621707 | 49.97  |
| 2     | 18.457    | 15809796 | 565225 | 50.03  |

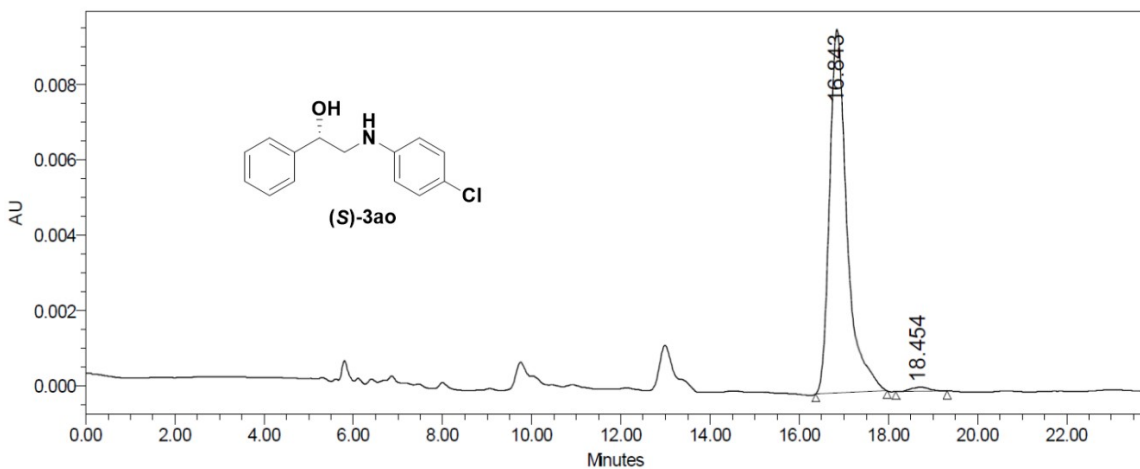

Channel: W2489 ChA; Processed Channel: W2489 ChA 254nm; Result Id: 2181; Processing Method: 1212

| Peak# | Ret. Time | Area   | Height | Area % |
|-------|-----------|--------|--------|--------|
| 1     | 16.843    | 261551 | 9653   | 98.80  |
| 2     | 18.454    | 3174   | 110    | 1.20   |



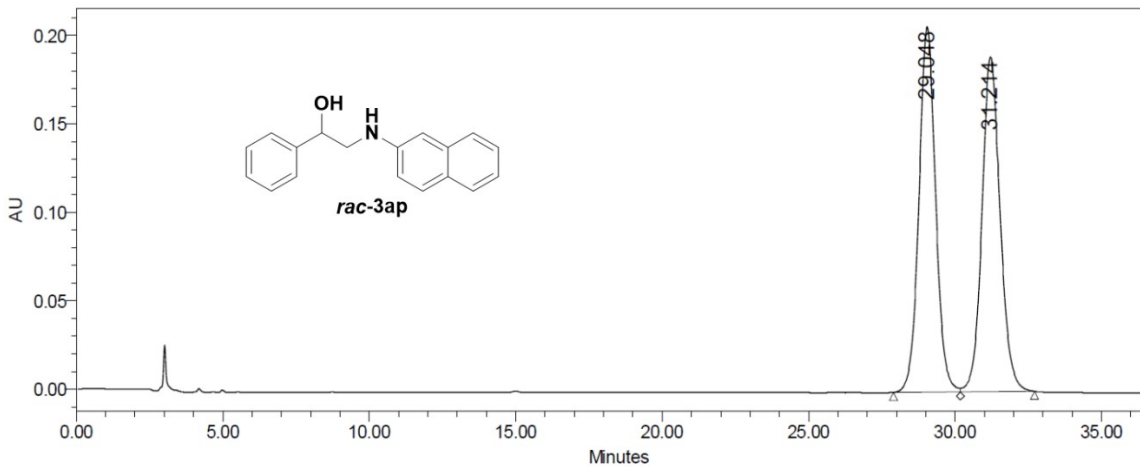

Channel: W2489 ChB; Processed Channel: W2489 ChB 254nm; Result Id: 1984; Processing Method: 33

| Peak# | Ret. Time | Area    | Height | Area % |
|-------|-----------|---------|--------|--------|
| 1     | 29.048    | 8194001 | 206796 | 49.98  |
| 2     | 31.214    | 8201197 | 189459 | 50.02  |

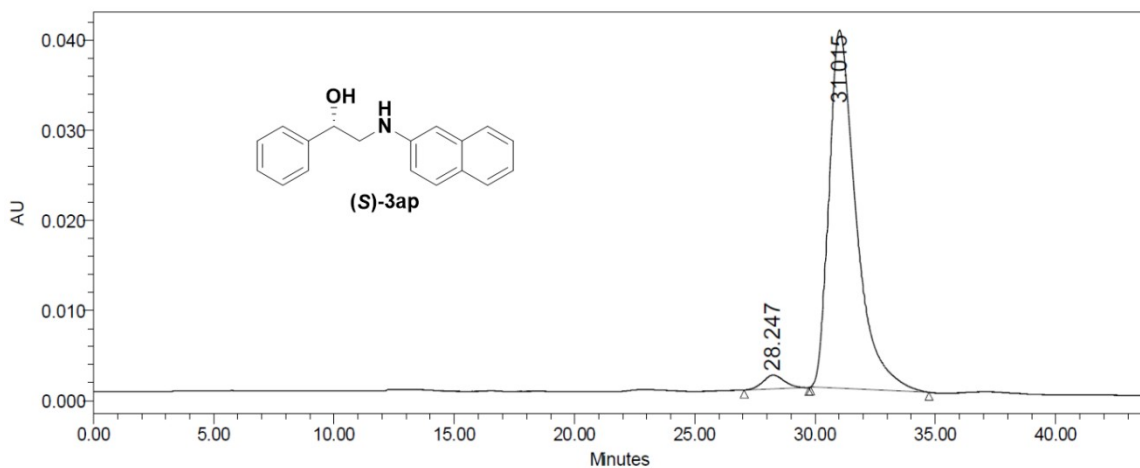

Channel: W2489 ChA; Processed Channel: W2489 ChA 254nm; Result Id: 1986; Processing Method: 33

| Peak# | Ret. Time | Area    | Height | Area % |
|-------|-----------|---------|--------|--------|
| 1     | 28.247    | 96087   | 1541   | 2.99   |
| 2     | 31.015    | 3116389 | 39731  | 97.01  |

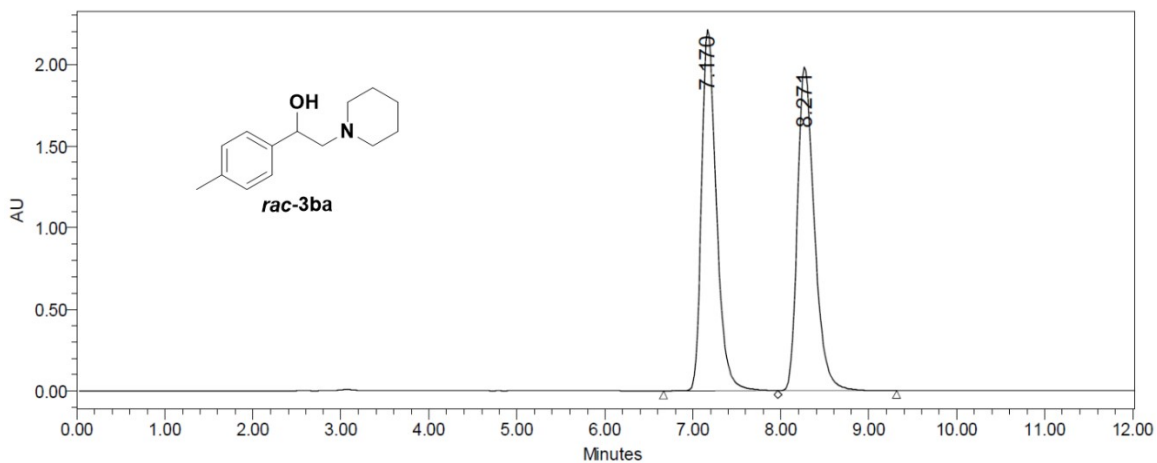

Channel: W2489 ChB; Processed Channel: W2489 ChB 225nm; Result Id: 1902; Processing Method: 13

| Peak# | Ret. Time | Area     | Height  | Area % |
|-------|-----------|----------|---------|--------|
| 1     | 7.170     | 26099302 | 2211637 | 49.60  |
| 2     | 8.271     | 26523886 | 1982857 | 50.40  |

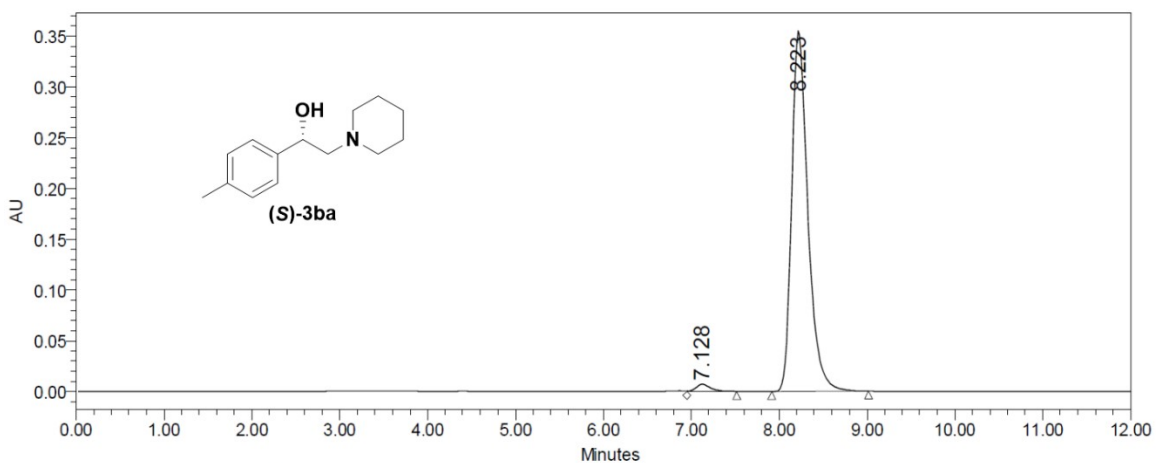

Channel: W2489 ChB; Processed Channel: W2489 ChB 225nm; Result Id: 1900; Processing Method: 13

| Peak# | Ret. Time | Area    | Height | Area % |
|-------|-----------|---------|--------|--------|
| 1     | 7.128     | 80596   | 7091   | 1.75   |
| 2     | 8.223     | 4536564 | 355663 | 98.25  |

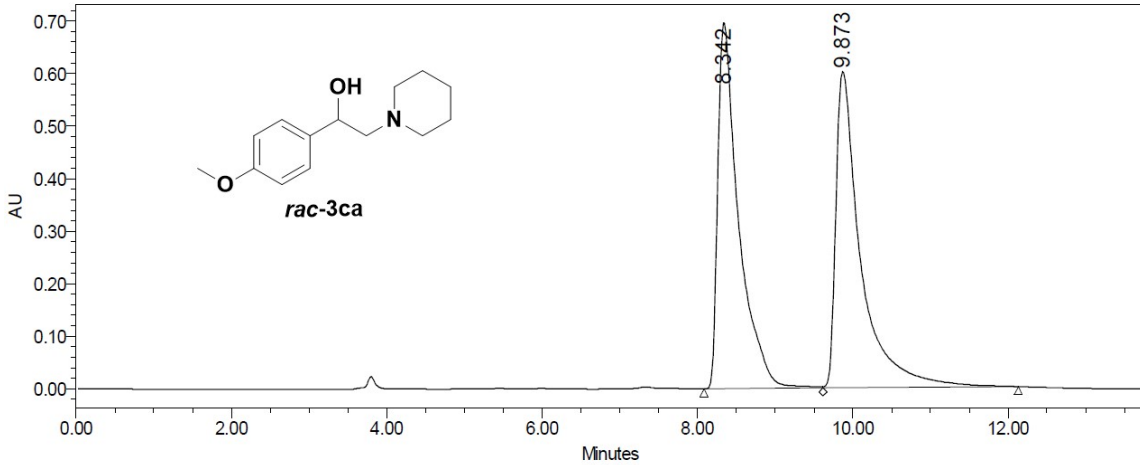

Channel: W2489 ChB; Processed Channel: W2489 ChB 230nm; Result Id: 2435; Processing Method: RAC

| Peak# | Ret. Time | Area     | Height | Area % |
|-------|-----------|----------|--------|--------|
| 1     | 8.342     | 13008327 | 699925 | 49.32  |
| 2     | 9.873     | 13367405 | 603971 | 50.68  |

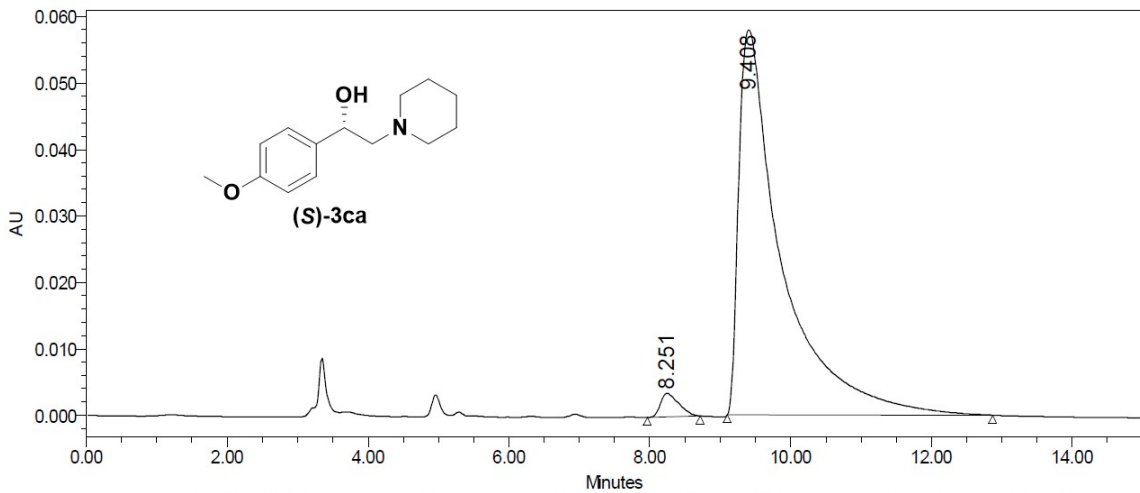

Channel: W2489 ChB; Processed Channel: W2489 ChB 230nm; Result Id: 2399; Processing Method: S

| Peak# | Ret. Time | Area    | Height | Area % |
|-------|-----------|---------|--------|--------|
| 1     | 8.251     | 63752   | 3534   | 2.53   |
| 2     | 9.408     | 2452402 | 57984  | 97.47  |

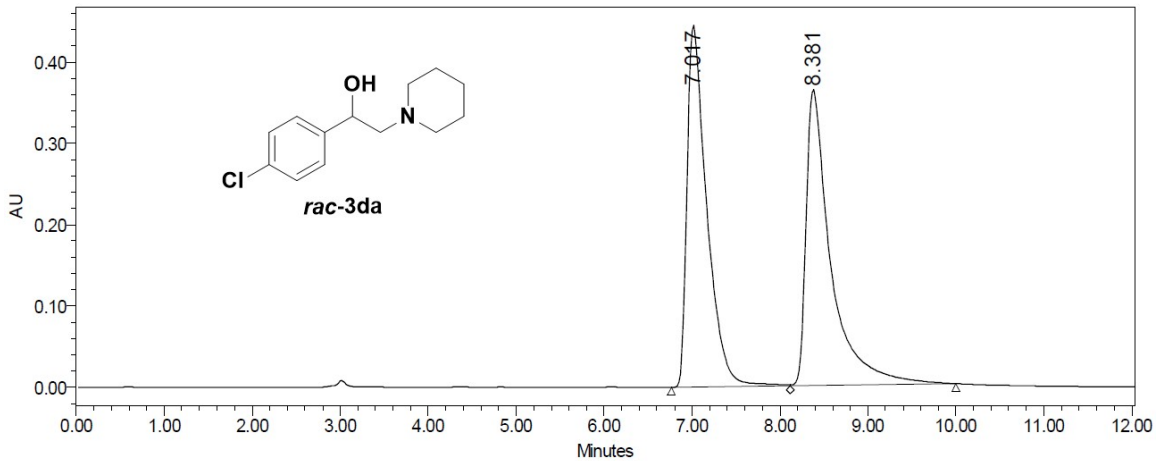

Channel: W2489 ChB; Processed Channel: W2489 ChB 230nm; Result Id: 2223; Processing Method: p

| Peak# | Ret. Time | Area    | Height | Area % |
|-------|-----------|---------|--------|--------|
| 1     | 7.017     | 6955716 | 444737 | 49.51  |
| 2     | 8.381     | 7094371 | 363801 | 50.49  |

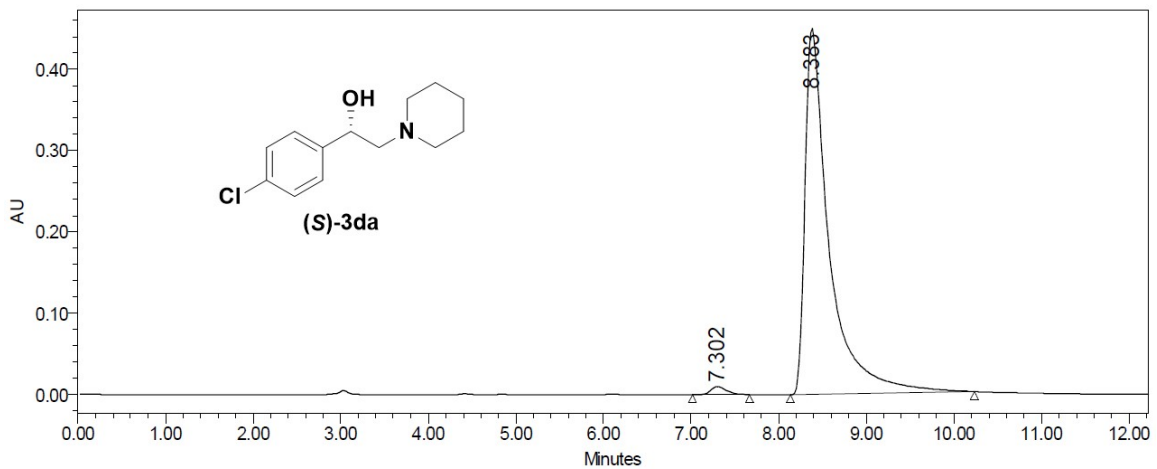

Channel: W2489 ChB; Processed Channel: W2489 ChB 230nm; Result Id: 2221; Processing Method: p

| Peak# | Ret. Time | Area    | Height | Area % |
|-------|-----------|---------|--------|--------|
| 1     | 7.302     | 121210  | 10030  | 1.38   |
| 2     | 8.383     | 8649496 | 449863 | 98.62  |

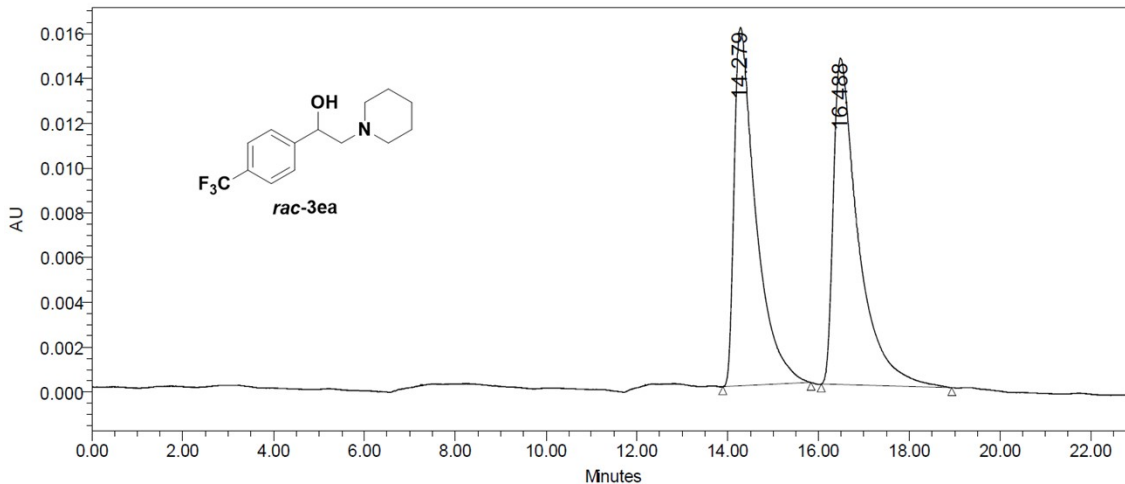

Channel: W2489 ChA; Processed Channel: W2489 ChA 225nm; Result Id: 1570; Processing Method: 5

| Peak# | Ret. Time | Area   | Height | Area % |
|-------|-----------|--------|--------|--------|
| 1     | 14.279    | 534520 | 16020  | 49.02  |
| 2     | 16.488    | 555887 | 14580  | 50.98  |

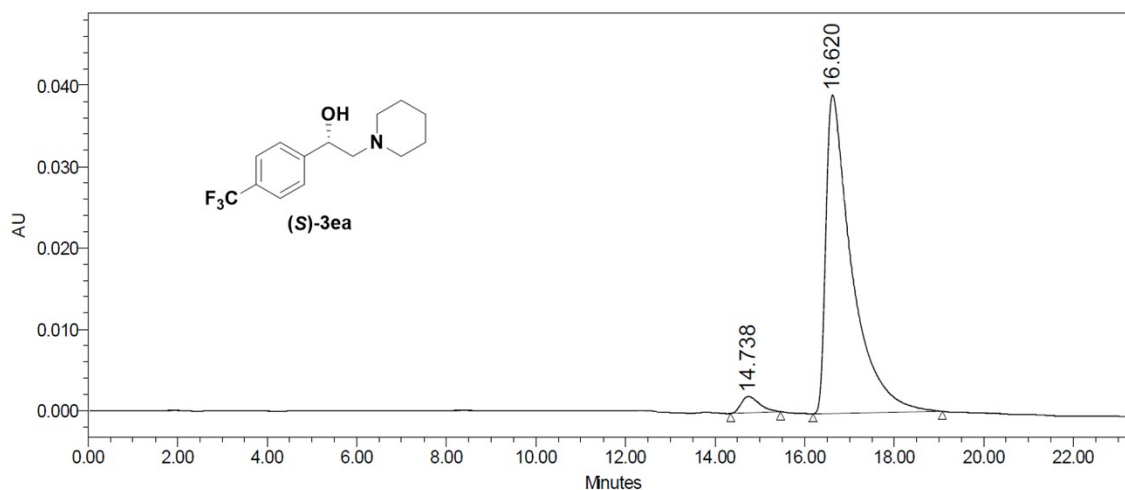

Channel: W2489 ChA; Processed Channel: W2489 ChA 225nm; Result Id: 1579; Processing Method: 6

| Peak# | Ret. Time | Area    | Height | Area % |
|-------|-----------|---------|--------|--------|
| 1     | 14.738    | 58089   | 2012   | 3.55   |
| 2     | 16.620    | 1578808 | 39152  | 96.45  |

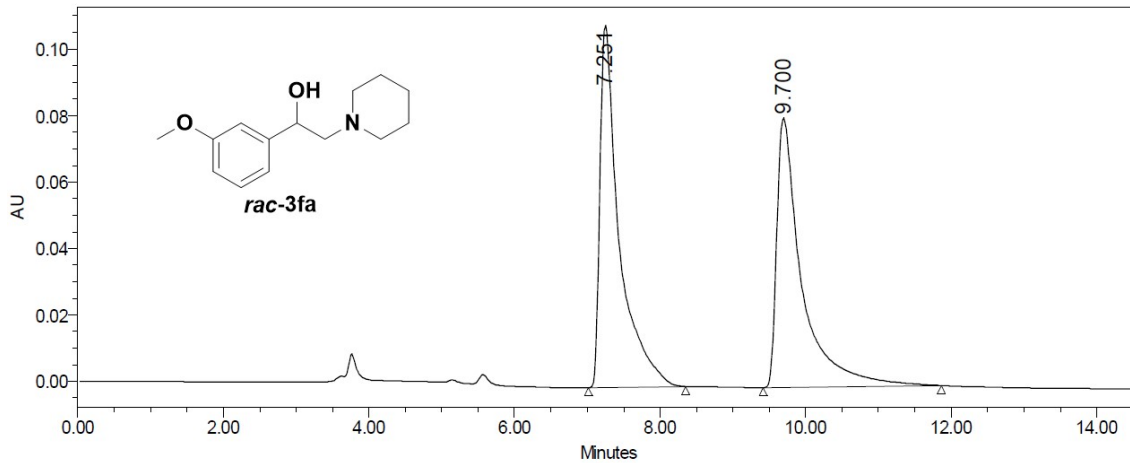

Channel: W2489 ChB; Processed Channel: W2489 ChB 230nm; Result Id: 2340; Processing Method: mOMe

| Peak# | Ret. Time | Area    | Height | Area % |
|-------|-----------|---------|--------|--------|
| 1     | 7.251     | 2002810 | 108961 | 50.85  |
| 2     | 9.700     | 1935530 | 81159  | 49.15  |

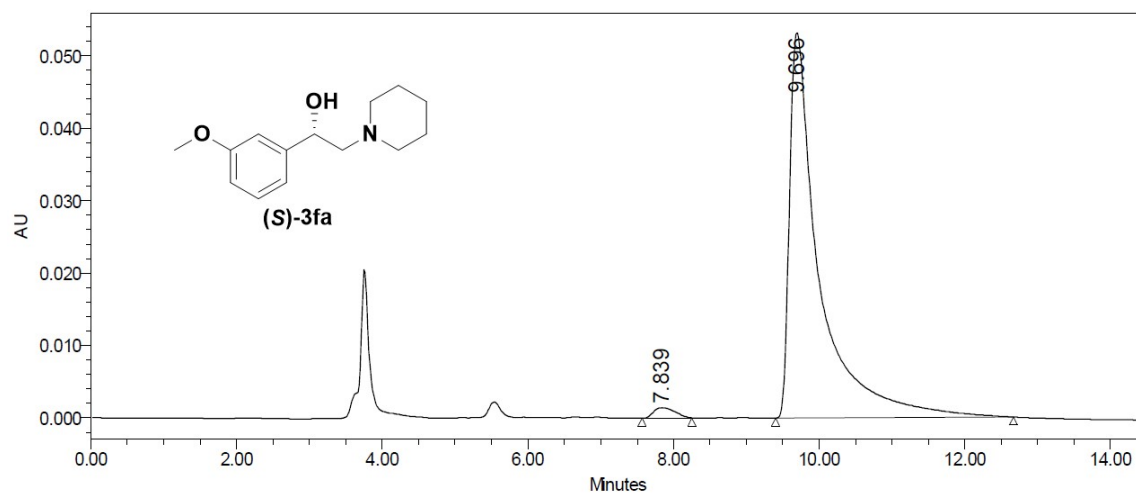

Channel: W2489 ChB; Processed Channel: W2489 ChB 230nm; Result Id: 2342; Processing Method: S

| Peak# | Ret. Time | Area    | Height | Area % |
|-------|-----------|---------|--------|--------|
| 1     | 7.839     | 28831   | 1432   | 1.87   |
| 2     | 9.696     | 1512761 | 53290  | 98.13  |

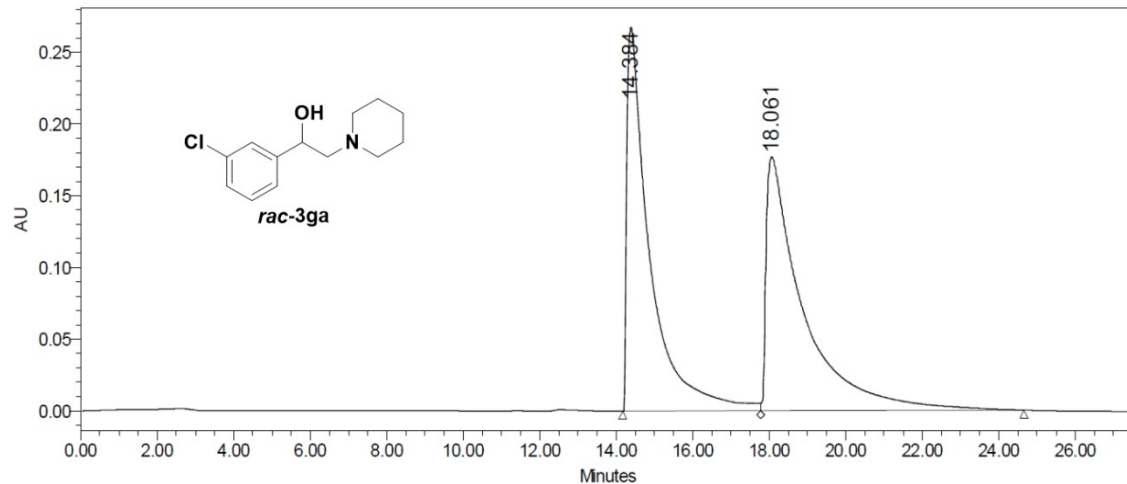

Channel: W2489 ChA; Processed Channel: W2489 ChA 225nm; Result Id: 1526; Processing Method: 3

| Peak# | Ret. Time | Area     | Height | Area % |
|-------|-----------|----------|--------|--------|
| 1     | 14.384    | 11334190 | 267615 | 49.02  |
| 2     | 18.061    | 11789244 | 177001 | 50.98  |

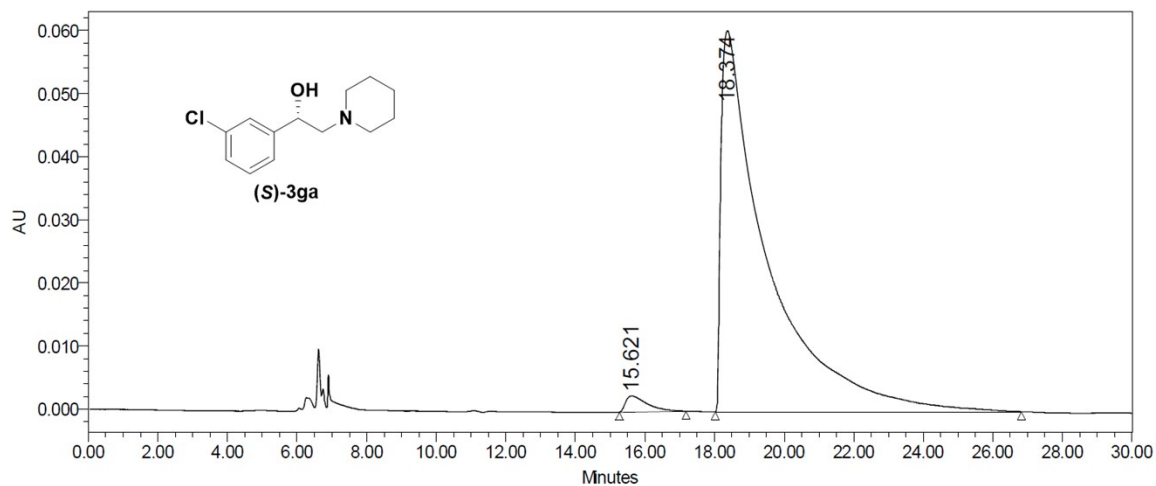

Channel: W2489 ChA; Processed Channel: W2489 ChA 225nm; Result Id: 1528; Processing Method: 4

| Peak# | Ret. Time | Area    | Height | Area % |
|-------|-----------|---------|--------|--------|
| 1     | 15.621    | 109311  | 2537   | 1.93   |
| 2     | 18.374    | 5558894 | 60411  | 98.07  |

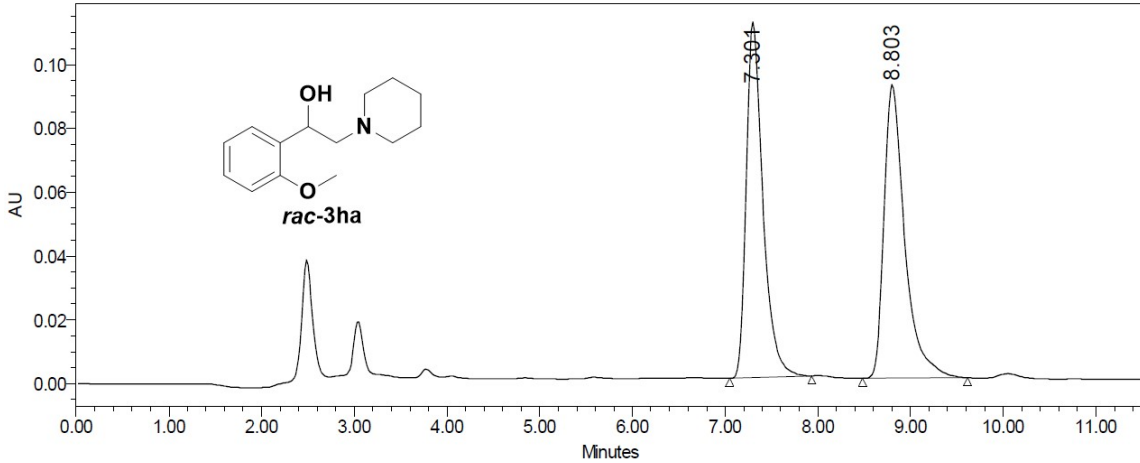

Channel: W2489 ChA; Processed Channel: W2489 ChA 225nm; Result Id: 2596; Processing Method: oOMe

| Peak# | Ret. Time | Area    | Height | Area % |
|-------|-----------|---------|--------|--------|
| 1     | 7.301     | 1395487 | 111291 | 49.31  |
| 2     | 8.803     | 1434297 | 92033  | 50.69  |

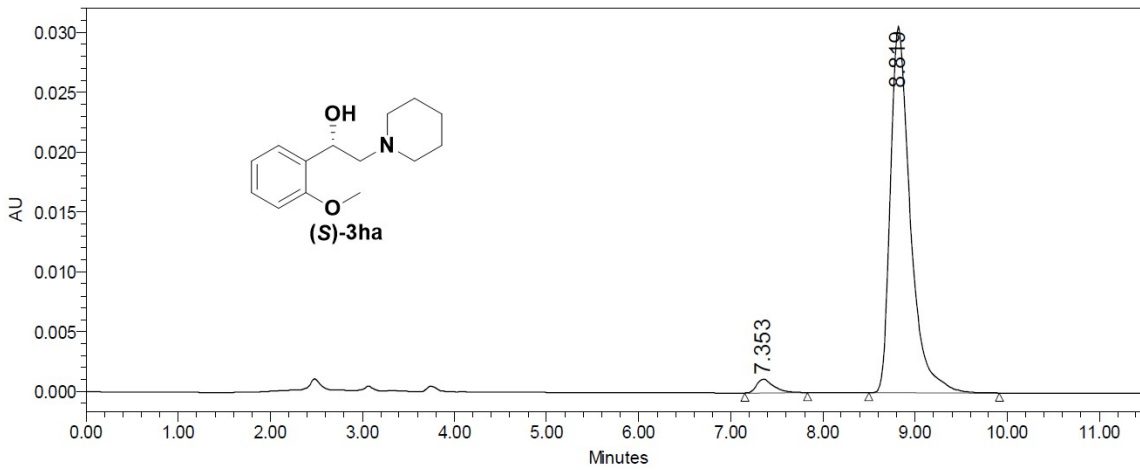

Channel: W2489 ChB; Processed Channel: W2489 ChB 225nm; Result Id: 2598; Processing Method: oOMe

| Peak# | Ret. Time | Area   | Height | Area % |
|-------|-----------|--------|--------|--------|
| 1     | 7.353     | 14798  | 1157   | 3.12   |
| 2     | 8.819     | 459321 | 30614  | 96.88  |



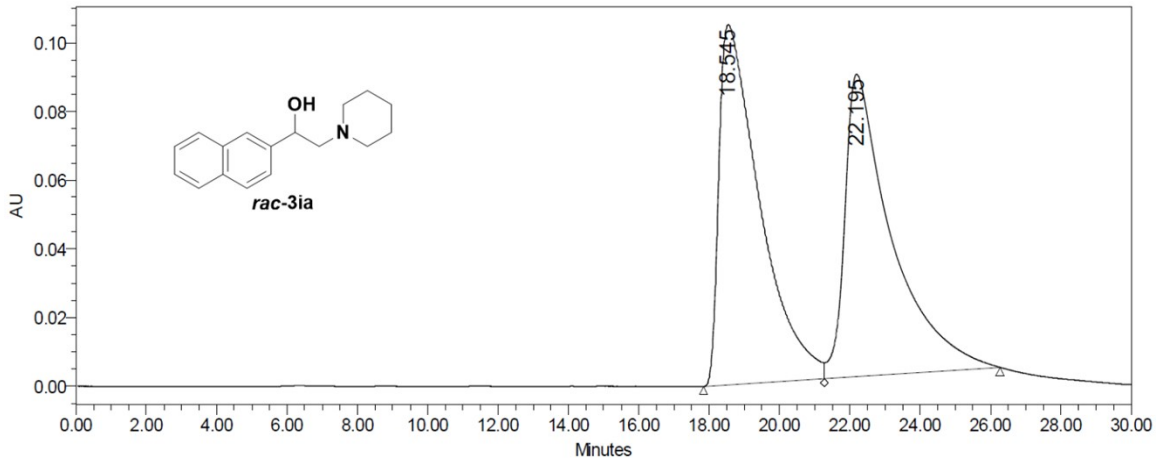

Channel: W2489 ChA; Processed Channel: W2489 ChA 254nm; Result Id: 1395; Processing Method: Default

| Peak# | Ret. Time | Area    | Height | Area % |
|-------|-----------|---------|--------|--------|
| 1     | 18.545    | 8422235 | 104832 | 50.91  |
| 2     | 22.195    | 8122607 | 88026  | 49.09  |

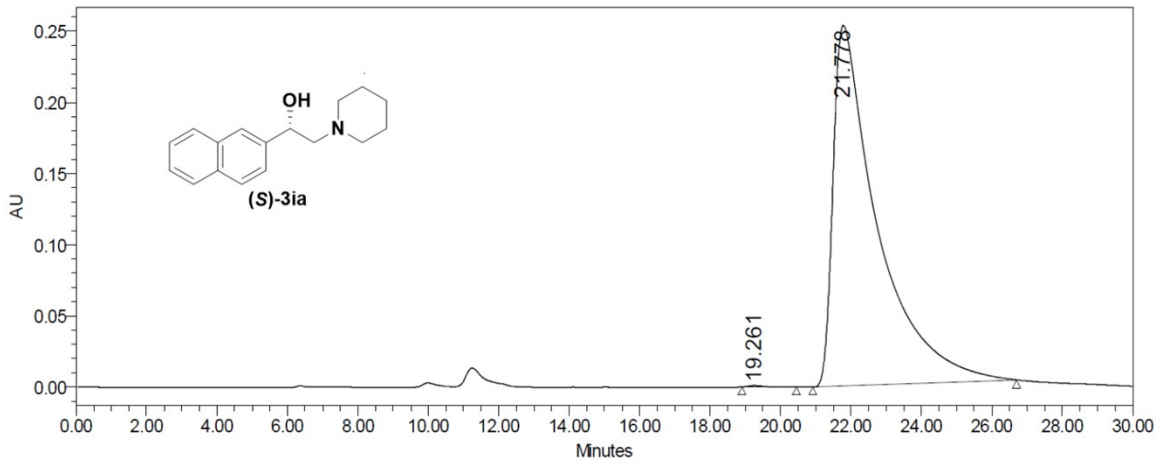

Channel: W2489 ChA; Processed Channel: W2489 ChA 254nm; Result Id: 1397; Processing Method: Default

| Peak# | Ret. Time | Area     | Height | Area % |
|-------|-----------|----------|--------|--------|
| 1     | 19.261    | 30121    | 966    | 0.14   |
| 2     | 21.778    | 22057560 | 253394 | 99.86  |

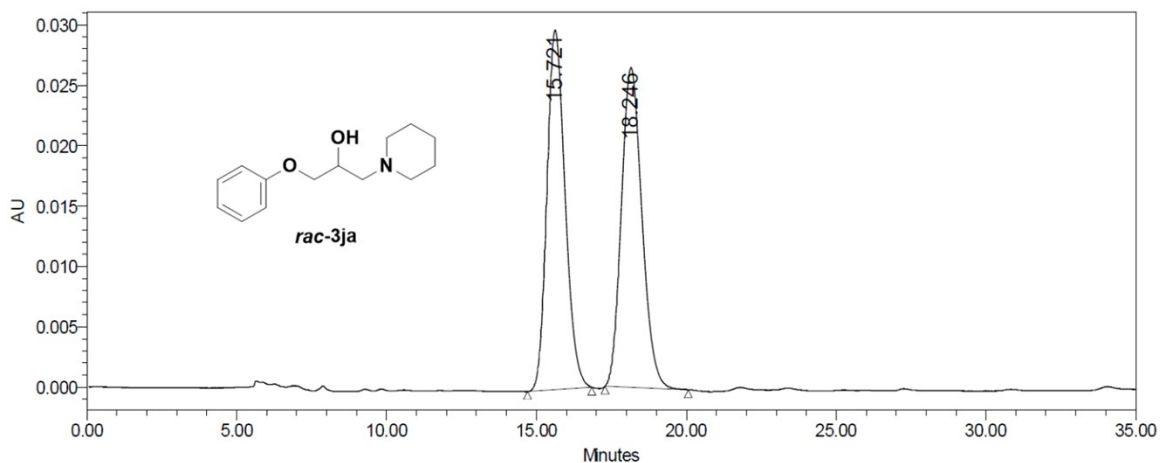

Channel: W2489 ChA; Processed Channel: W2489 ChA 254nm; Result Id: 4514; Processing Method: RAC

| Peak# | Ret. Time | Area    | Height | Area % |
|-------|-----------|---------|--------|--------|
| 1     | 15.721    | 1263437 | 29794  | 50.07  |
| 2     | 18.246    | 1259821 | 26480  | 49.93  |

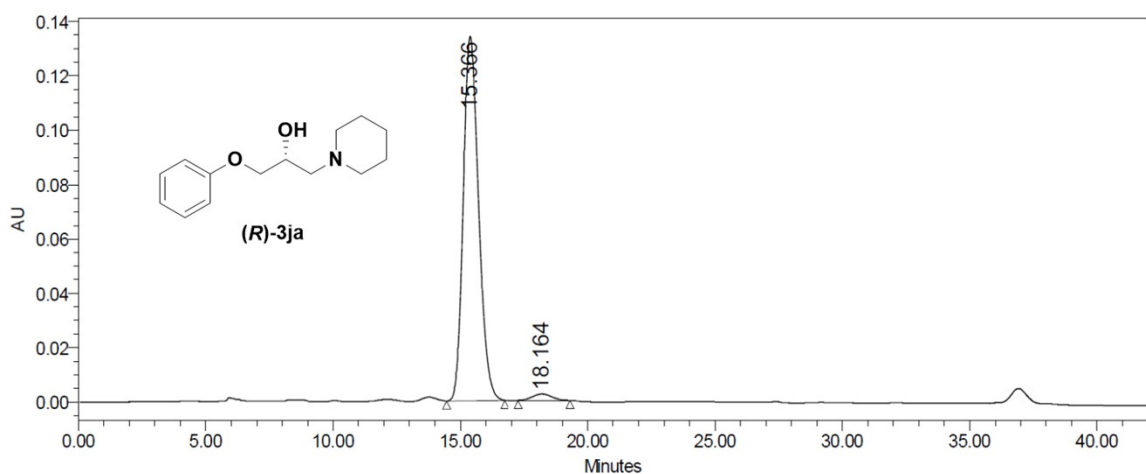

Channel: W2489 ChA; Processed Channel: W2489 ChA 254nm; Result Id: 4528; Processing Method:

| Peak# | Ret. Time | Area    | Height | Area % |
|-------|-----------|---------|--------|--------|
| 1     | 15.366    | 5608020 | 134089 | 97.79  |
| 2     | 18.164    | 126979  | 2402   | 2.21   |

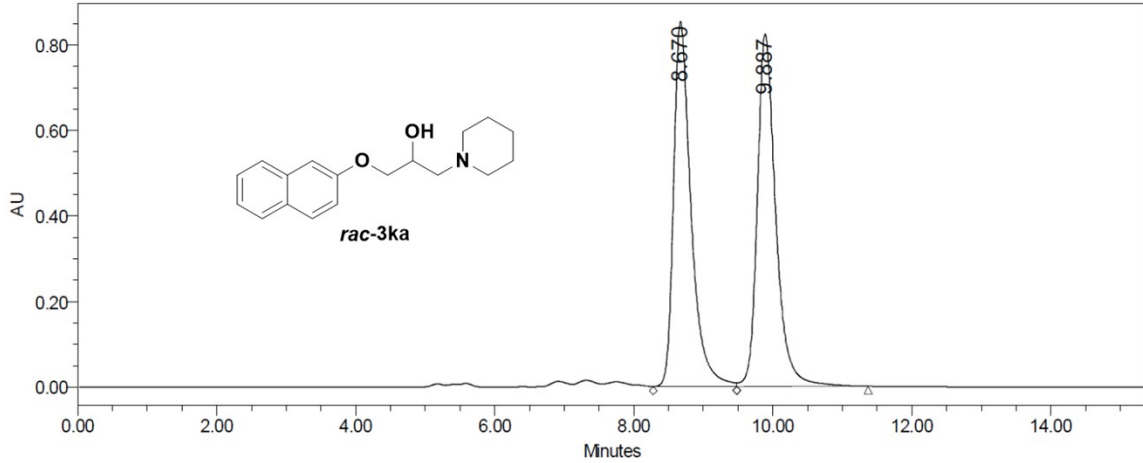

Channel: W2489 ChA; Processed Channel: W2489 ChA 254nm; Result Id: 4504; Processing Method: NeO

| Peak# | Ret. Time | Area     | Height | Area % |
|-------|-----------|----------|--------|--------|
| 1     | 8.670     | 14862713 | 853755 | 49.47  |
| 2     | 9.887     | 15178537 | 824254 | 50.53  |

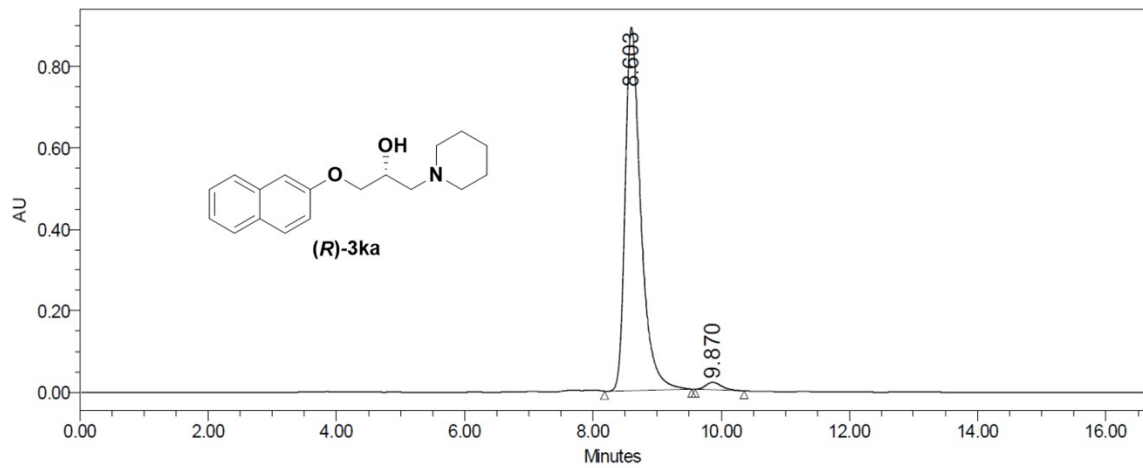

Channel: W2489 ChA; Processed Channel: W2489 ChA 254nm; Result Id: 4502; Processing Method:

| Peak# | Ret. Time | Area     | Height | Area % |
|-------|-----------|----------|--------|--------|
| 1     | 8.603     | 15131180 | 891127 | 97.96  |
| 2     | 9.870     | 315225   | 18117  | 2.04   |

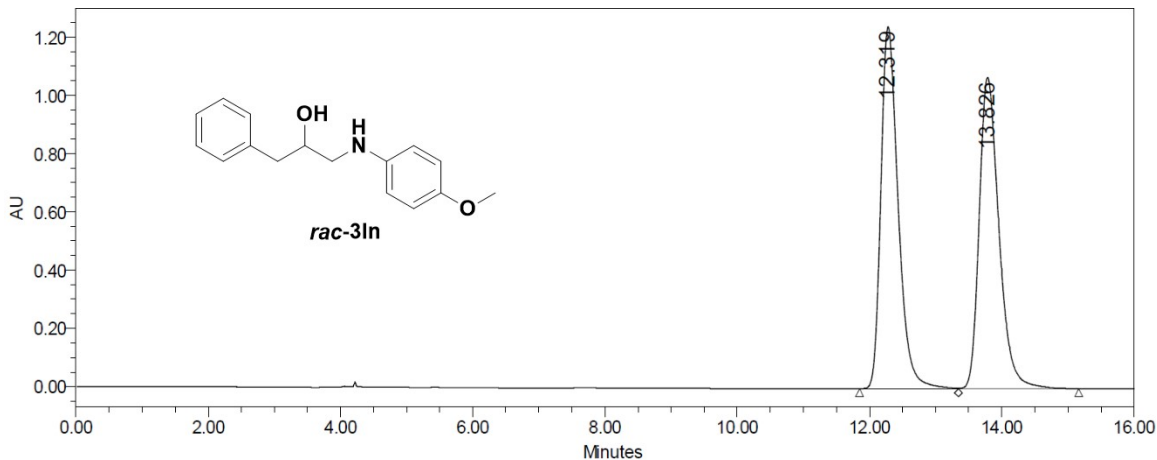

Channel: W2489 ChA; Processed Channel: W2489 ChA 230nm; Result Id: 1528; Processing Method: rac

| Peak# | Ret. Time | Area     | Height  | Area % |
|-------|-----------|----------|---------|--------|
| 1     | 12.319    | 22559634 | 1242041 | 50.48  |
| 2     | 13.826    | 22128797 | 1067949 | 49.52  |

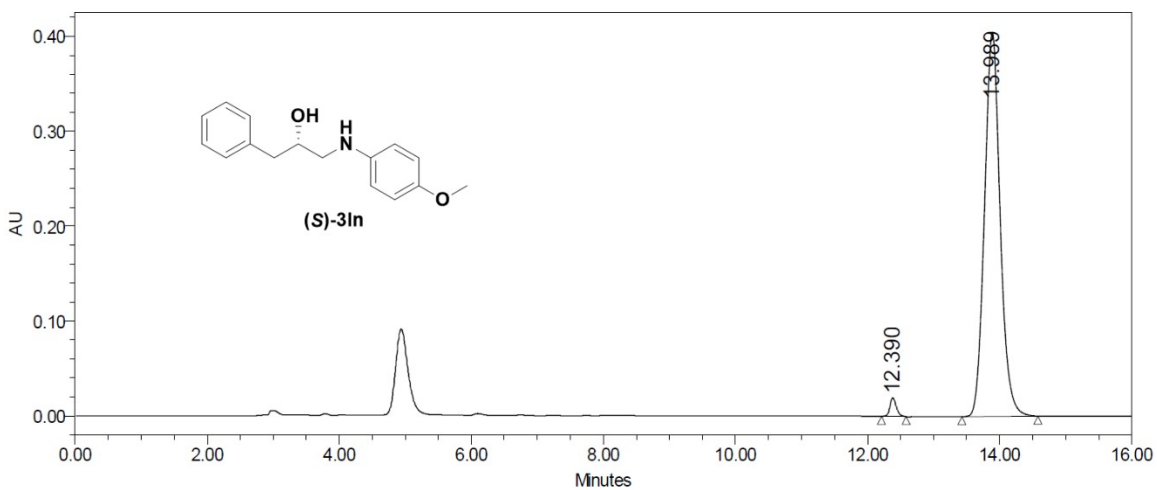

Channel: W2489 ChA; Processed Channel: W2489 ChA 230nm; Result Id: 1533; Processing Method: S

| Peak# | Ret. Time | Area    | Height | Area % |
|-------|-----------|---------|--------|--------|
| 1     | 12.390    | 132598  | 19556  | 1.95   |
| 2     | 13.989    | 6653439 | 404421 | 98.05  |

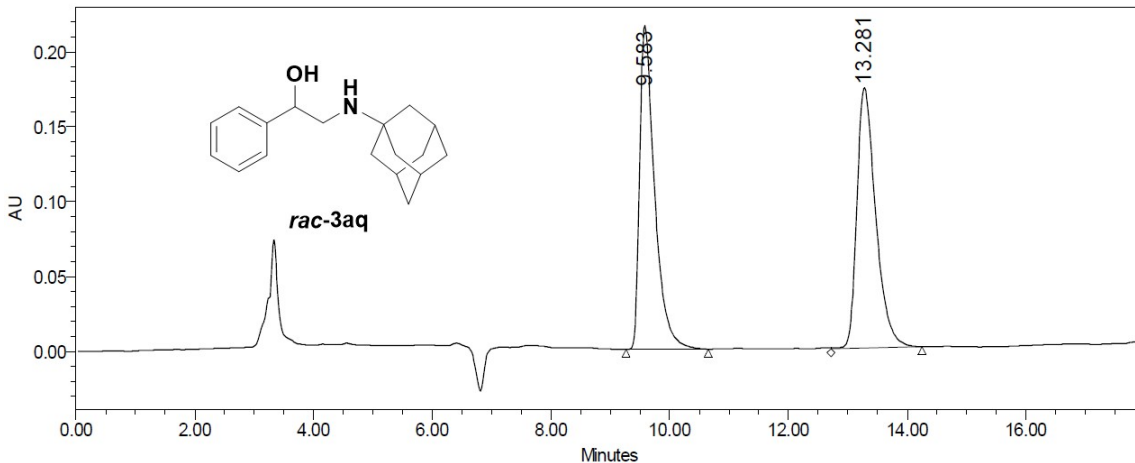

Channel: W2489 ChA; Processed Channel: W2489 ChA 210nm; Result Id: 3244; Processing Method: RAC

| Peak# | Ret. Time | Area    | Height | Area % |
|-------|-----------|---------|--------|--------|
| 1     | 9.583     | 3784345 | 216176 | 49.75  |
| 2     | 13.281    | 3822330 | 173665 | 50.25  |

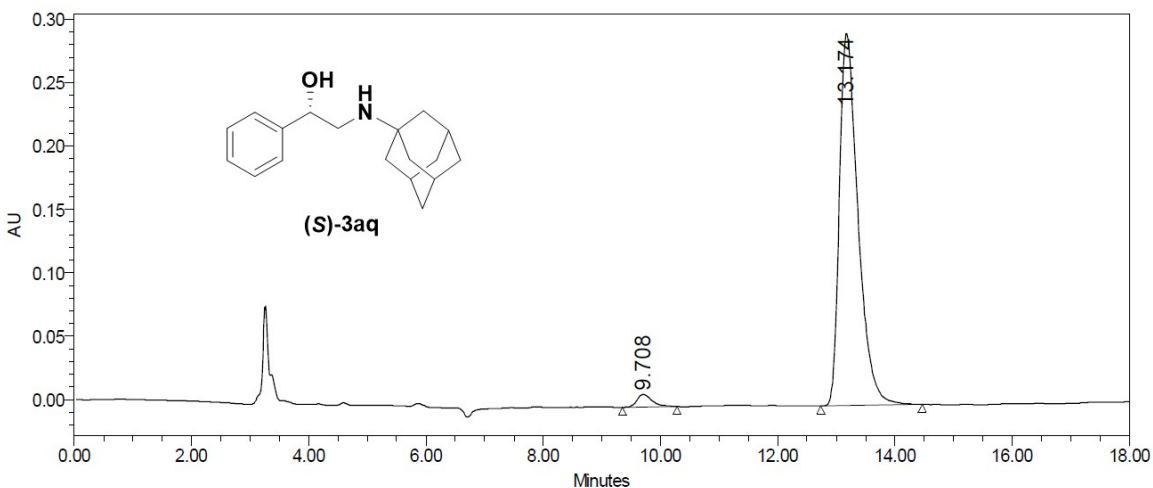

Channel: W2489 ChA; Processed Channel: W2489 ChA 210nm; Result Id: 3246; Processing Method: S

| Peak# | Ret. Time | Area    | Height | Area % |
|-------|-----------|---------|--------|--------|
| 1     | 9.708     | 180844  | 10078  | 2.71   |
| 2     | 13.174    | 6489498 | 294124 | 97.29  |

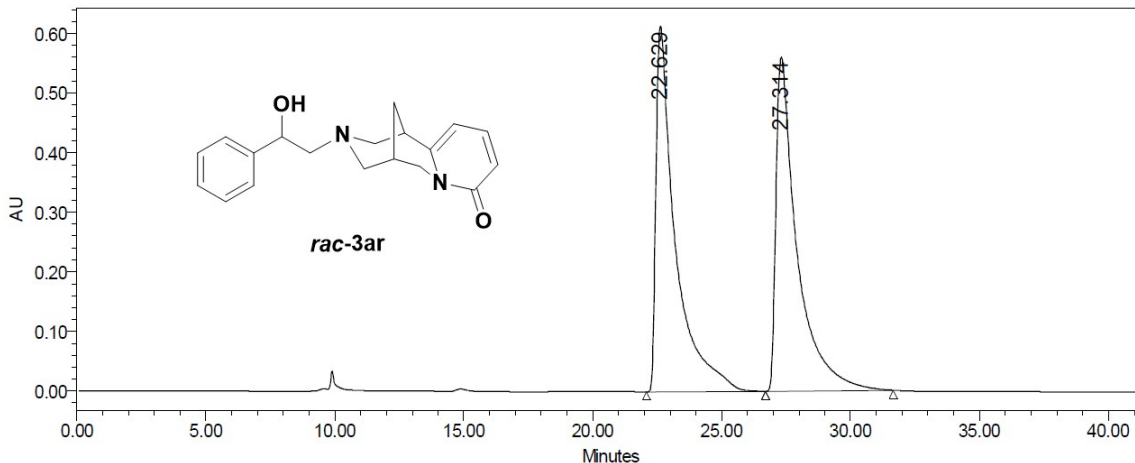

Channel: W2489 ChB; Processed Channel: W2489 ChB 230nm; Result Id: 2867; Processing Method: LYS

| Peak# | Ret. Time | Area     | Height | Area % |
|-------|-----------|----------|--------|--------|
| 1     | 22.629    | 31919457 | 612776 | 50.13  |
| 2     | 27.314    | 31755926 | 560076 | 49.87  |

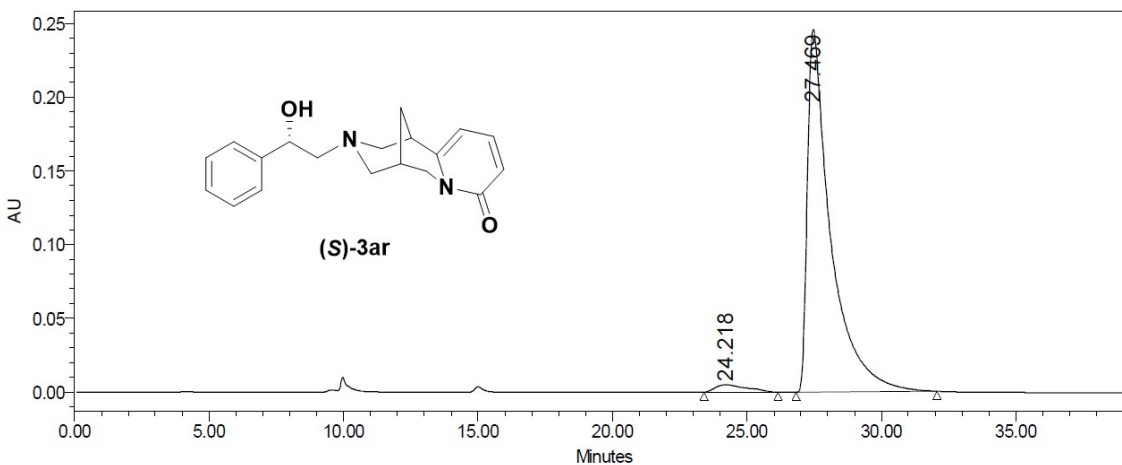

Channel: W2489 ChB; Processed Channel: W2489 ChB 230nm; Result Id: 2869; Processing Method: LYS

| Peak# | Ret. Time | Area     | Height | Area % |
|-------|-----------|----------|--------|--------|
| 1     | 24.218    | 418674   | 5093   | 2.74   |
| 2     | 27.469    | 14841521 | 246152 | 97.26  |

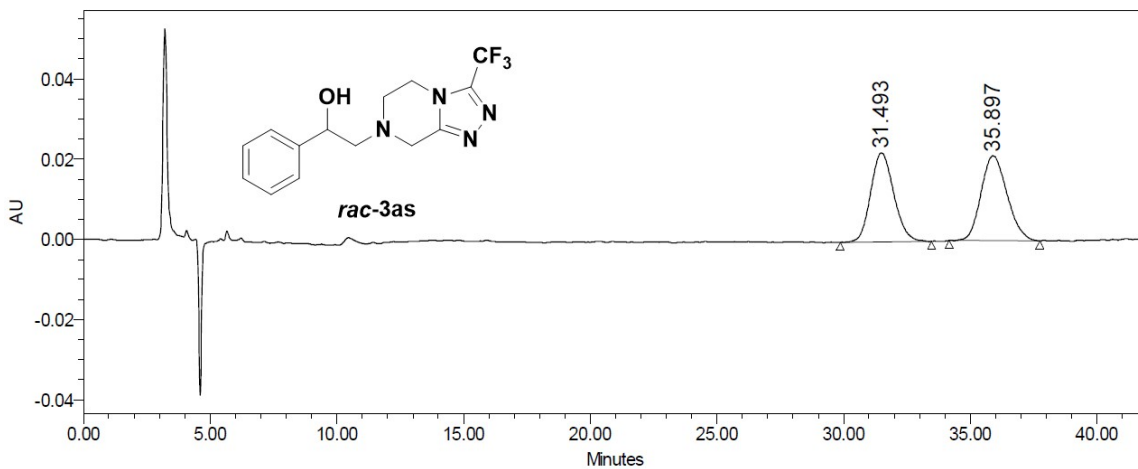

Channel: W2489 ChA; Processed Channel: W2489 ChA 220nm; Result Id: 3299; Processing Method: RAC

| Peak# | Ret. Time | Area    | Height | Area % |
|-------|-----------|---------|--------|--------|
| 1     | 31.493    | 1409802 | 22206  | 48.14  |
| 2     | 35.897    | 1518622 | 21167  | 51.86  |

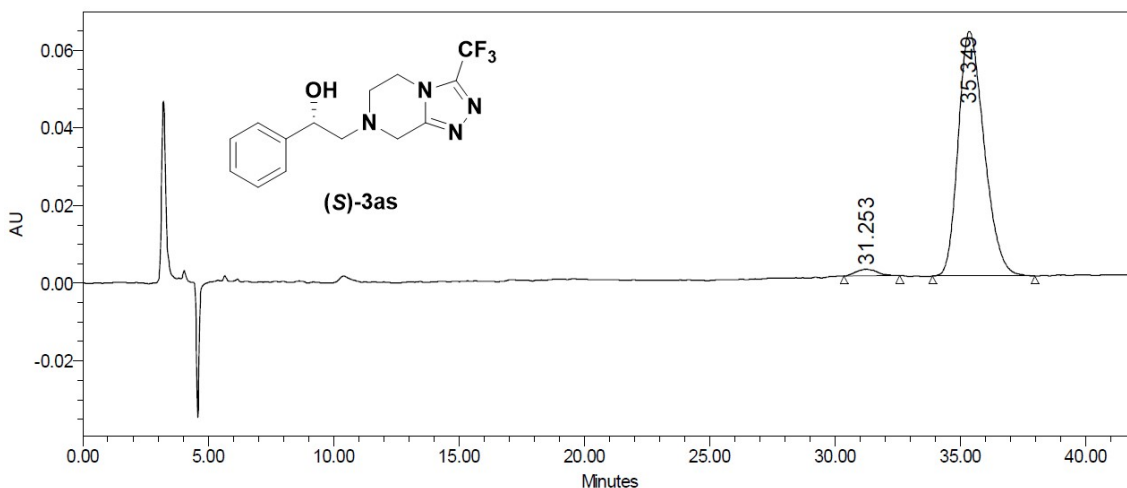

Channel: W2489 ChA; Processed Channel: W2489 ChA 220nm; Result Id: 3297; Processing Method: S

| Peak# | Ret. Time | Area    | Height | Area % |
|-------|-----------|---------|--------|--------|
| 1     | 31.253    | 103546  | 1714   | 2.24   |
| 2     | 35.349    | 4526713 | 62995  | 97.76  |

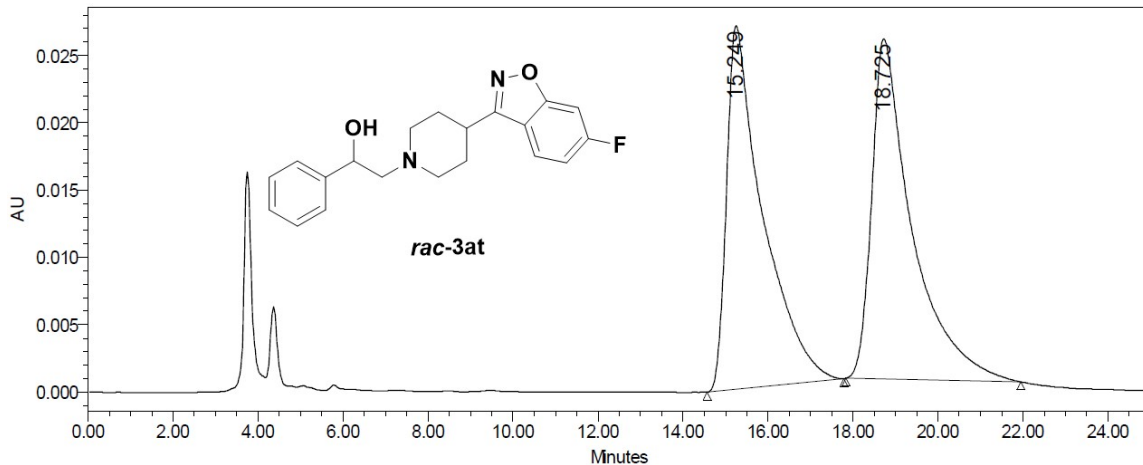

Channel: W2489 ChB; Processed Channel: W2489 ChB 225nm; Result Id: 2650; Processing Method: LPT

| Peak# | Ret. Time | Area    | Height | Area % |
|-------|-----------|---------|--------|--------|
| 1     | 15.249    | 1597226 | 26996  | 49.06  |
| 2     | 18.725    | 1658719 | 25279  | 50.94  |

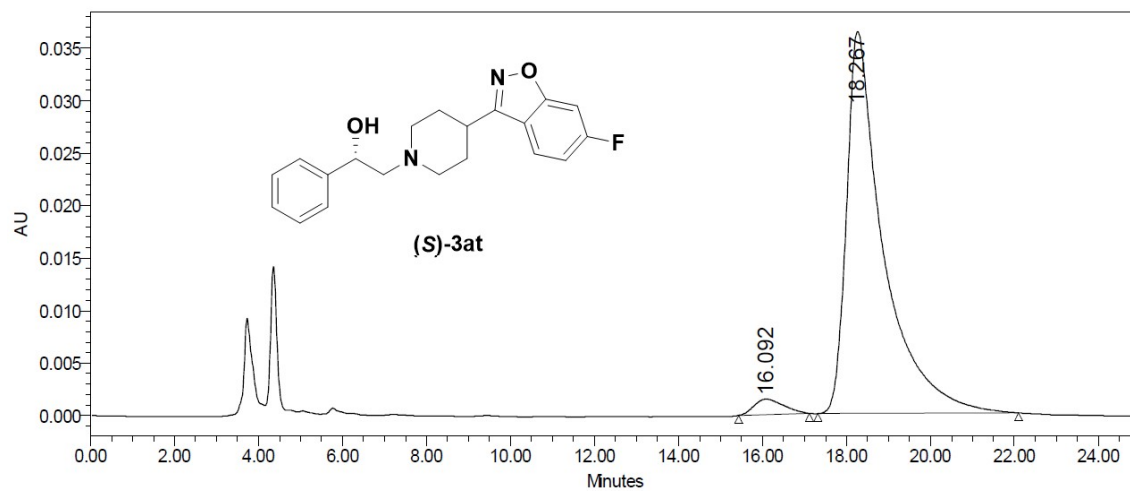

Channel: W2489 ChB; Processed Channel: W2489 ChB 225nm; Result Id: 2662; Processing Method: S

| Peak# | Ret. Time | Area    | Height | Area % |
|-------|-----------|---------|--------|--------|
| 1     | 16.092    | 71779   | 1472   | 3.15   |
| 2     | 18.267    | 2210084 | 36392  | 96.85  |



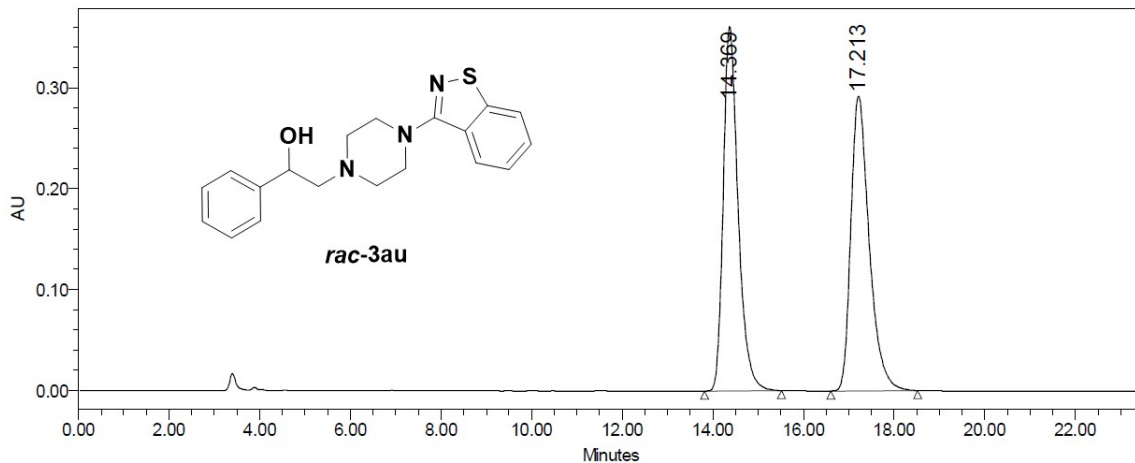

Channel: W2489 ChA; Processed Channel: W2489 ChA 225nm; Result Id: 2676; Processing Method: PLBL

| Peak# | Ret. Time | Area    | Height | Area % |
|-------|-----------|---------|--------|--------|
| 1     | 14.369    | 8210161 | 360719 | 50.02  |
| 2     | 17.213    | 8202298 | 291957 | 49.98  |

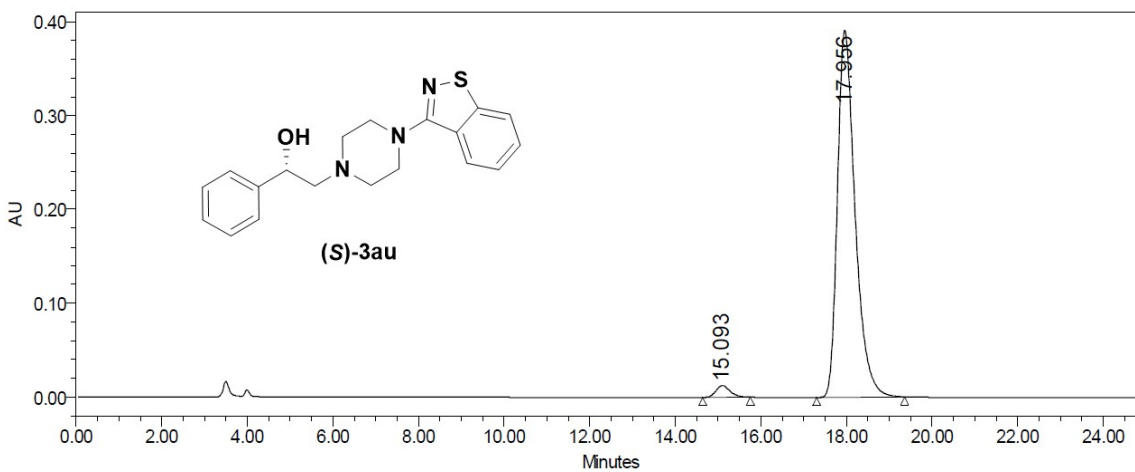

Channel: W2489 ChA; Processed Channel: W2489 ChA 225nm; Result Id: 2696; Processing Method: PLBL

| Peak# | Ret. Time | Area     | Height | Area % |
|-------|-----------|----------|--------|--------|
| 1     | 15.093    | 288216   | 12538  | 2.51   |
| 2     | 17.956    | 11200389 | 390856 | 97.49  |

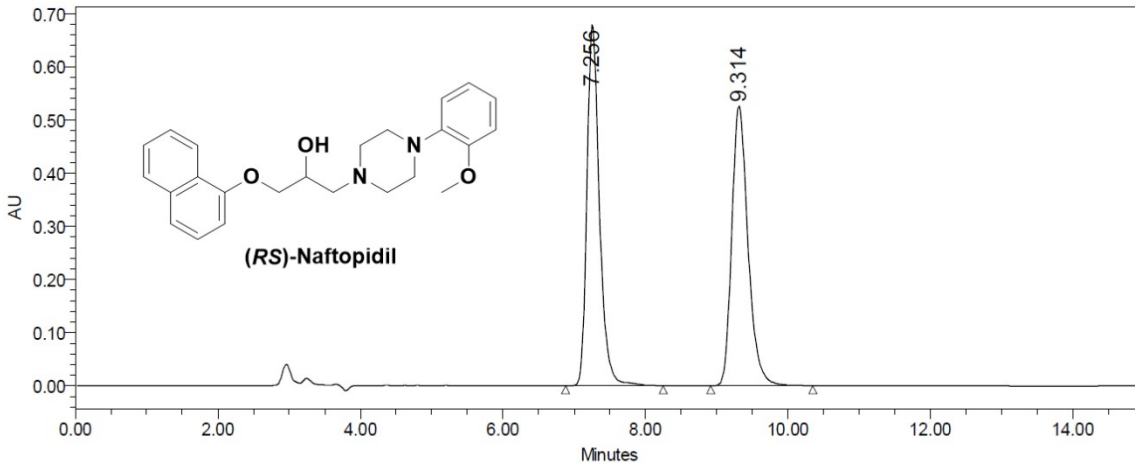

Channel: W2489 ChB; Processed Channel: W2489 ChB 230nm; Result Id: 3341; Processing Method: RAC

|   | Ret. Time | Area    | Height | Area % |
|---|-----------|---------|--------|--------|
| 1 | 7.256     | 8341007 | 680775 | 50.12  |
| 2 | 9.314     | 8302349 | 526633 | 49.88  |

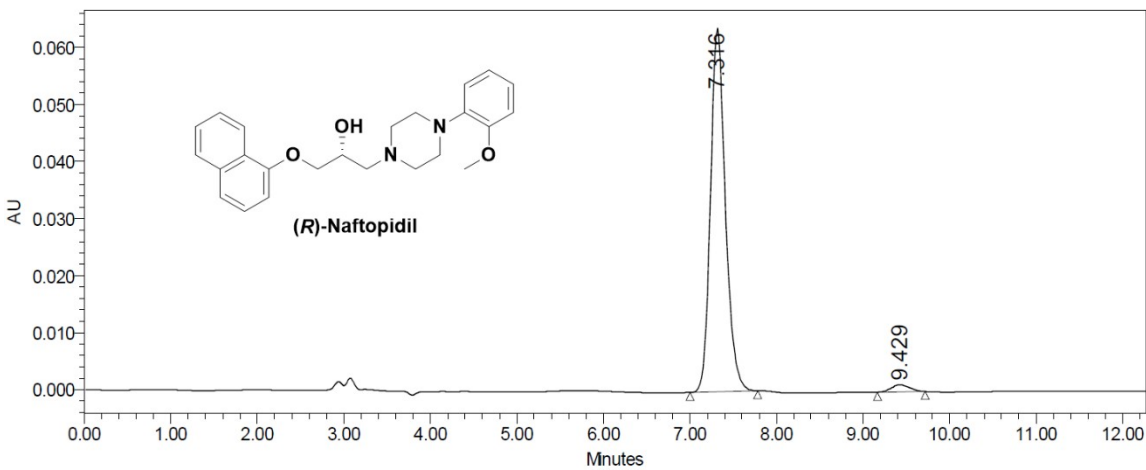

Channel: W2489 ChB; Processed Channel: W2489 ChB 230nm; Result Id: 3381; Processing Method:

| Peak# | Ret. Time | Area   | Height | Area % |
|-------|-----------|--------|--------|--------|
| 1     | 7.316     | 767526 | 63676  | 97.69  |
| 2     | 9.429     | 18185  | 1253   | 2.31   |
